# Supplementary material
Source: publisher figshare collection journal article supplement (https://springernature.figshare.com/ndownloader/files/13564316)
Supplement: Supplementary file 1 [file 13564316]

mnemonic	year	X1_1_1_1_1	X1_1_1_2_1	X1_1_1_2_2	X1_1_1_3_1	X1_1_1_4_1	X1_1_1_4_2	X1_1_1_5_1	X1_1_2_1_1	X1_1_2_2_1	X1_1_2_3_1	X1_1_2_4_1	X1_1_2_5_1	X1_1_2_5_2	X1_1_2_5_3	X1_1_2_6_1	X1_1_2_7_1	X1_1_3_1_1	X1_1_3_2_1	X1_1_3_3_1	X1_1_3_4_1	X1_1_4_1_1	X1_1_4_2_1	X1_1_4_3_1	X1_1_4_4_1	X1_1_4_5_1	X1_1_4_6_1	X1_1_4_7_1	X1_1_5_1_1	X1_1_5_2_1	X1_1_5_3_1	X1_1_5_4_1	X1_1_5_5_1	X1_1_6_1_1	X1_1_6_2_1	X1_1_6_3_1	X1_1_6_4_1	X1_1_6_5_1	X1_1_6_6_1	X1_1_6_7_1	X1_1_6_8_1	X1_1_6_9_1	X1_1_7_1_1	X1_1_7_2_1	X1_1_7_3_1	X1_1_7_4_1	X1_1_7_5_1	X1_1_7_6_1	X1_1_7_7_1
E06000001	2016	0.14625119	1.041559645	0.971876579	0.181039349	0.613049475	0.362419807	0.970604314	0.857961844	0.254478588	0.216240278	0.902104838	0.36714015	0.404424897	0.037678735	2.32547167	0.011397573	0.311316195	0.115019765	0.123585648	0.493403781	0.162820322	0.653673607	0.072242519	0.476709212	0.838218368	0.420270809	0.282979798	0.178462425	0.209283978	0.047424792	0.066066668	0.008735715	0.237518531	0.192651925	0.236045071	0.063439169	0.196240117	0.612835323	0.174259671	0.314015229	0.061448782	0.360902503	0.153515513	0.554899297	0.557854021	0.016103138	0.629948412	0.368965977
E06000002	2016	0.157096187	0.964659411	0.909614785	0.175582522	0.576523282	0.332052247	0.922578488	0.770921593	0.2340699	0.231040632	0.865413862	0.327844433	0.35116287	0.037053492	2.074337066	0.010217844	0.315240877	0.109886766	0.111759499	0.451793338	0.166734994	0.593562745	0.086925089	0.452075239	0.763438	0.392868336	0.269817694	0.164247385	0.191381439	0.051390832	0.066831028	0.007325583	0.232556468	0.187954493	0.222331275	0.059267936	0.193264667	0.563860887	0.175594456	0.311250167	0.056645861	0.344883815	0.142725682	0.534927498	0.532049177	0.026276475	0.578619454	0.330816041
E06000003	2016	0.14516109	1.071208788	0.999517594	0.181175347	0.640818506	0.36256315	0.995504234	0.883027016	0.261071539	0.224338588	0.926066824	0.378043256	0.420908973	0.039636687	2.383039461	0.011418162	0.332177882	0.120852222	0.129592683	0.516032428	0.161177899	0.682000495	0.068432518	0.491204781	0.865241045	0.430107773	0.292702841	0.187378119	0.219332668	0.048429178	0.066875653	0.009398345	0.245169709	0.19837185	0.246850117	0.066799801	0.202323372	0.634981242	0.1756291	0.332968928	0.065302546	0.371772359	0.162902401	0.573383446	0.575605101	0.016922074	0.651117876	0.386511073
E06000004	2016	0.155614953	1.016044814	0.954563712	0.177309954	0.601255607	0.35319167	0.971344563	0.821672912	0.240508387	0.229378033	0.913418764	0.35325354	0.3818353	0.037847992	2.205273915	0.010898937	0.327557079	0.120040375	0.124625908	0.48382319	0.15672998	0.633885747	0.084441778	0.476352638	0.828843117	0.411756827	0.284365509	0.175677873	0.200633235	0.051686627	0.064479744	0.007940781	0.240368102	0.191768691	0.240503604	0.062345695	0.206796272	0.61394817	0.178564677	0.328280034	0.060857904	0.37797089	0.153539718	0.571942857	0.559734543	0.022109736	0.629689124	0.350525456
E06000005	2016	0.154918938	1.031204655	0.967247556	0.181151076	0.615165043	0.356820116	0.977653338	0.856167981	0.254346608	0.225123684	0.924431139	0.36917905	0.392225079	0.038963361	2.261622267	0.010699069	0.334030223	0.122806684	0.128628964	0.501135424	0.156707569	0.648170839	0.079072276	0.487114434	0.851337222	0.423095233	0.288855562	0.180560718	0.206788639	0.052394318	0.06547801	0.008701151	0.245144585	0.195158703	0.244253577	0.064665518	0.209850303	0.628039372	0.179882369	0.336613127	0.062982112	0.383048843	0.157335428	0.583541	0.572311715	0.020368541	0.642997679	0.361406112
E06000006	2016	0.147349983	1.035282958	0.969898621	0.179638907	0.603773287	0.363325257	0.97507815	0.854718819	0.247830941	0.213386268	0.919510048	0.369738596	0.402502183	0.03663713	2.288616839	0.011250952	0.312406751	0.117110623	0.125092363	0.490590952	0.151494999	0.646368865	0.076546461	0.473935814	0.857164742	0.418851322	0.283463852	0.176138369	0.205888603	0.049405806	0.063750533	0.008207961	0.237090863	0.191436618	0.242985364	0.062720544	0.200691605	0.624327854	0.173582323	0.326007458	0.060623164	0.376613634	0.156069976	0.572029868	0.563921861	0.016839118	0.655704956	0.365270429
E06000007	2016	0.159127188	1.036712343	0.974413301	0.183162215	0.613397628	0.362593101	0.992087465	0.862582606	0.248258582	0.234409817	0.948425842	0.371848995	0.389172526	0.038998838	2.254324777	0.010862674	0.340570153	0.127161203	0.132952618	0.50041916	0.156519264	0.643832345	0.085733585	0.491727952	0.869378265	0.42641756	0.293635447	0.182447229	0.205687235	0.056169003	0.064838435	0.008464587	0.249956142	0.195925963	0.247344256	0.064353198	0.218095875	0.642049856	0.185510975	0.349101557	0.062930154	0.397237168	0.158309561	0.596850678	0.579262211	0.021218171	0.659153152	0.356424105
E06000008	2016	0.184081781	0.899061617	0.874117363	0.173833151	0.539350257	0.292339159	0.90138735	0.668922983	0.222732821	0.287839322	0.853714109	0.282783311	0.295335334	0.038334275	1.78543668	0.009581693	0.357341099	0.112082171	0.099695232	0.409780913	0.197885065	0.534402638	0.117895746	0.435992853	0.680985413	0.375161549	0.273359399	0.154312789	0.174487237	0.063385398	0.072037242	0.006221379	0.240728462	0.191003982	0.220598323	0.056195343	0.200805956	0.52805366	0.195883829	0.321749495	0.051055979	0.339130518	0.137858401	0.548493396	0.526798087	0.051563784	0.540576706	0.296088925
E06000009	2016	0.14401915	1.046500792	0.972015009	0.185957638	0.626619309	0.360055047	0.968154112	0.860512709	0.253423283	0.214342406	0.895440175	0.368757802	0.403247125	0.038368266	2.33116131	0.009972382	0.316176934	0.112401678	0.122073498	0.500570091	0.164970981	0.662112036	0.068910558	0.47783262	0.834812626	0.415888582	0.282477392	0.181137437	0.212603876	0.048335602	0.066361269	0.009186406	0.238409306	0.194345075	0.237289881	0.064462481	0.197243514	0.606926834	0.170122442	0.324802708	0.063288039	0.353243958	0.156923742	0.549474452	0.556735933	0.017333933	0.629537385	0.375253553
E06000010	2016	0.147733832	0.95056974	0.877754456	0.173942638	0.552661117	0.335622813	0.899131772	0.757779711	0.226326642	0.197073901	0.835770356	0.330754411	0.352348247	0.033883912	2.070817759	0.009292265	0.285521412	0.102065786	0.106681663	0.447734055	0.151762439	0.584656144	0.078404771	0.432231102	0.755652068	0.380481671	0.259212438	0.156416574	0.188606711	0.046493988	0.062512516	0.006999755	0.218976364	0.177133923	0.218818754	0.056080491	0.184040593	0.543809173	0.162276004	0.293912004	0.05375263	0.338660705	0.138605465	0.513987129	0.512117942	0.020157213	0.57844149	0.323589527
E06000011	2016	0.151337797	1.097833352	1.030064643	0.177118115	0.663982513	0.366660195	1.023907601	0.921808877	0.266844399	0.247734006	0.972840527	0.390873296	0.431973203	0.04264943	2.427453867	0.011868049	0.363172279	0.133501868	0.145071124	0.544792707	0.154599881	0.707027743	0.071199667	0.516143878	0.912840996	0.446067407	0.309436547	0.199526033	0.22357262	0.054668929	0.066175364	0.009709088	0.25890773	0.206073738	0.261695415	0.071421479	0.225045667	0.685079116	0.184859698	0.366581398	0.070825823	0.404448992	0.175490557	0.620151764	0.609556138	0.019109286	0.694514668	0.397093149
E06000012	2016	0.143025908	1.023304773	0.950626836	0.174687672	0.60961935	0.354254599	0.956524228	0.834309665	0.244680099	0.214351763	0.890630121	0.35802331	0.396971979	0.037674674	2.274912021	0.010615884	0.312614741	0.114316663	0.122867333	0.493838844	0.15452429	0.645084008	0.072995591	0.470011398	0.824598822	0.409985356	0.278749977	0.175861402	0.205860364	0.048066714	0.063520689	0.008499331	0.234144049	0.188588773	0.234999508	0.062832565	0.198001031	0.603265939	0.169127373	0.318532482	0.061749486	0.359103311	0.15387858	0.548862746	0.551044552	0.017335333	0.624282788	0.360586379
E06000013	2016	0.151838127	1.039855015	0.973605751	0.176301953	0.621417643	0.354355555	0.977902043	0.851935149	0.249224453	0.235466807	0.922625878	0.363819624	0.400391268	0.039594464	2.282670626	0.011787536	0.335822248	0.122645836	0.129259432	0.502227534	0.159456085	0.656545215	0.080582131	0.485215557	0.846137005	0.421105422	0.291421951	0.18260962	0.209394703	0.052317988	0.066154416	0.008589193	0.244701588	0.195950115	0.24438074	0.065361175	0.207835744	0.626898463	0.177958552	0.336734228	0.063885163	0.37681055	0.159970192	0.577530053	0.57180386	0.020690492	0.646161054	0.367115008
E06000014	2016	0.154760968	1.012196234	0.942211987	0.179687251	0.603749475	0.34835151	0.961396062	0.832734013	0.240979997	0.227480124	0.924971327	0.365667932	0.379681508	0.038412936	2.202163145	0.010320189	0.337590155	0.121918753	0.128720186	0.49342144	0.150150414	0.62838065	0.079900247	0.479983947	0.841100573	0.417653709	0.289816383	0.178147527	0.203957154	0.055577875	0.062813878	0.008222292	0.243064811	0.192748828	0.241125689	0.063430096	0.218166377	0.622551986	0.179977741	0.340485279	0.062001948	0.387231719	0.15653343	0.58087865	0.566603751	0.021124651	0.645463083	0.347015544
E06000015	2016	0.170709253	0.955903801	0.910513918	0.175699479	0.576274246	0.323933499	0.932924448	0.751798307	0.225927556	0.249256854	0.89015667	0.323668691	0.338167212	0.038967606	2.011667509	0.011178903	0.342545022	0.121523603	0.117877216	0.459061977	0.170457402	0.580978806	0.105958577	0.463250839	0.76782233	0.399101691	0.282411742	0.166434755	0.190157578	0.059680092	0.068124966	0.00706463	0.244883984	0.191978133	0.229211104	0.060233731	0.212857148	0.581530112	0.185492956	0.332087235	0.058227446	0.368896757	0.145491634	0.565422942	0.548359167	0.03196645	0.598247587	0.316680835
E06000016	2016	0.223793168	0.817778008	0.799878213	0.168909758	0.498970235	0.2498305	0.851707891	0.559785236	0.196887851	0.347591772	0.841463277	0.233797233	0.227422166	0.040445312	1.466761173	0.009305983	0.403486067	0.114801716	0.090347168	0.372856984	0.212365347	0.472287805	0.144761488	0.407093432	0.587021493	0.34478818	0.275773299	0.144736878	0.156730732	0.073411475	0.078487503	0.004457386	0.249042096	0.194307233	0.209812756	0.052322006	0.212580626	0.482181	0.211323321	0.334350512	0.046109809	0.337531655	0.131127142	0.561906935	0.523502506	0.075923944	0.504734636	0.250435565
E06000017	2016	0.151715904	1.135036724	1.063527326	0.184731605	0.690688477	0.37809748	1.053003087	0.962381699	0.27613804	0.255044939	0.99313511	0.408653345	0.445486787	0.043970967	2.499338314	0.012866704	0.374656198	0.136005636	0.149606497	0.556924194	0.171606304	0.727835353	0.077262396	0.529925168	0.943147623	0.467489524	0.320126931	0.2065019	0.233678267	0.055770454	0.069072475	0.010345881	0.265018002	0.21491231	0.266727416	0.074609491	0.229336709	0.703691856	0.189183844	0.375828944	0.073654657	0.402965601	0.180743518	0.627225305	0.624317307	0.018155427	0.705598216	0.413391379
E06000018	2016	0.183284013	0.895758776	0.808785803	0.170620871	0.518140185	0.295774635	0.856116823	0.676900788	0.204166857	0.24031923	0.829062392	0.295608524	0.292680435	0.038877974	1.813222272	0.0108171	0.306891737	0.103894155	0.099269939	0.420393033	0.171839647	0.533582993	0.114148334	0.408561346	0.675960038	0.356323166	0.264644443	0.148502761	0.176697803	0.059686137	0.075141962	0.006006846	0.224378816	0.185819377	0.205489541	0.053862446	0.194008142	0.513720074	0.173384453	0.298118773	0.049759315	0.332362133	0.127842257	0.513411921	0.505696012	0.033274489	0.535458328	0.285162192
E06000019	2016	0.149122929	1.087617736	1.014752834	0.179406746	0.653762355	0.363658549	1.008565792	0.914386427	0.265270158	0.242420089	0.95290366	0.38812626	0.421974088	0.041374061	2.391854007	0.011224638	0.352527111	0.125786903	0.138093706	0.529379205	0.163475618	0.696738566	0.07283683	0.505716284	0.893235739	0.441713814	0.303661809	0.19714156	0.221954521	0.053357536	0.067181787	0.009822252	0.250527317	0.205293637	0.25240641	0.069745845	0.215557651	0.662987844	0.179976124	0.357738438	0.068746016	0.385090167	0.171636658	0.597537306	0.594817254	0.018930503	0.673678492	0.393761548
E06000020	2016	0.156058989	1.002957005	0.935834067	0.177747372	0.588405754	0.35179376	0.959678106	0.815290716	0.237294207	0.222328885	0.898240063	0.351013202	0.375089493	0.036757049	2.177446698	0.010770356	0.317419977	0.114990274	0.119541296	0.478574896	0.1553396	0.621711645	0.088082492	0.465875385	0.81542071	0.405922677	0.277741021	0.169641728	0.198029254	0.052204423	0.064875144	0.007636958	0.235243929	0.189340357	0.236518915	0.061301075	0.202547199	0.599282511	0.175192658	0.322543181	0.058152824	0.367888654	0.150672602	0.559759971	0.550177818	0.021828782	0.622844083	0.344294595
E06000021	2016	0.163080454	0.957386004	0.900260363	0.175505778	0.570190088	0.319493024	0.919890885	0.763326409	0.23504364	0.240170244	0.869289784	0.33155656	0.347149756	0.038103492	2.033792219	0.009894102	0.329330276	0.112354449	0.111821696	0.453832832	0.168466041	0.587892307	0.090332477	0.446773992	0.758921256	0.3907202	0.276214423	0.164997245	0.191573468	0.054935449	0.066314534	0.00741562	0.234164192	0.188846095	0.225966244	0.059043782	0.199393752	0.564905957	0.177938766	0.316475273	0.055967159	0.35275738	0.145707183	0.547842245	0.538338659	0.030942507	0.587941959	0.328679627
E06000022	2016	0.159369768	1.070166148	0.999735674	0.183049214	0.643425076	0.364839586	1.008727094	0.887294708	0.252813151	0.245956973	0.975967386	0.384234183	0.402056919	0.04192272	2.318272244	0.010948162	0.361075708	0.132149056	0.142832872	0.521530833	0.159284622	0.668440531	0.082686044	0.509492132	0.897924076	0.441156667	0.308275909	0.194062429	0.215001011	0.059068179	0.066588893	0.008963438	0.259073001	0.204347394	0.255825053	0.068166743	0.233238235	0.670218962	0.188119457	0.368342061	0.068236315	0.411409832	0.168164185	0.619241683	0.60122372	0.021177537	0.68383523	0.370100902
E06000023	2016	0.170946791	0.964092396	0.891288397	0.183097908	0.559488932	0.339283929	0.930957583	0.777603525	0.222520186	0.232483684	0.923259183	0.343836742	0.335708028	0.038742975	2.028885673	0.010466747	0.333474519	0.120734867	0.11990475	0.459815917	0.161527586	0.575956071	0.099274618	0.463063224	0.800302827	0.39637847	0.285599199	0.16458865	0.18873792	0.061270658	0.064476468	0.006979799	0.240067741	0.189802053	0.231026135	0.058346203	0.219807464	0.585259902	0.183092815	0.333309251	0.057188372	0.389764892	0.144532768	0.57260556	0.551656855	0.026299458	0.621081526	0.31107027
E06000024	2016	0.157986806	1.110190153	1.044088729	0.183683728	0.672154971	0.377860294	1.044059452	0.936933211	0.270094074	0.254086564	1.002586356	0.399052029	0.429034679	0.043682188	2.435828657	0.011556569	0.371923266	0.136601	0.150965712	0.551079991	0.161091805	0.711349007	0.083431986	0.526598172	0.933258547	0.456666711	0.316112565	0.204021451	0.223514465	0.05822063	0.068395218	0.00979273	0.264539744	0.209699792	0.264970832	0.072204269	0.236314259	0.705495679	0.190994686	0.377883135	0.071974044	0.418982754	0.176798908	0.63830247	0.623992788	0.020253666	0.707334953	0.395707444
E06000025	2016	0.163111658	1.077483743	1.009706636	0.187849403	0.640513881	0.37611647	1.030998632	0.893394915	0.257565003	0.240919083	0.971614298	0.383057409	0.405523509	0.040449996	2.363291949	0.011333747	0.351246481	0.12945478	0.137083876	0.523969753	0.159536693	0.674408228	0.089380049	0.511455002	0.893613204	0.442945788	0.302692435	0.187944906	0.21502682	0.056169948	0.065596882	0.008625079	0.257661184	0.20316097	0.255975264	0.067984	0.224340511	0.662094351	0.1913499	0.35463459	0.065841929	0.405282826	0.16434555	0.611237366	0.597695638	0.020771374	0.674369611	0.370244189
E06000026	2016	0.155489582	1.042603593	0.963915175	0.18425875	0.614234957	0.360888786	0.979502502	0.844645098	0.248376046	0.222652881	0.923257961	0.368594845	0.393117516	0.037986011	2.282962399	0.010614196	0.324864942	0.116030747	0.124164865	0.495906726	0.160087286	0.645874508	0.080685801	0.478047392	0.841591464	0.420773226	0.28967101	0.178073183	0.209058459	0.052217699	0.065585463	0.008296598	0.239509761	0.193822946	0.240226854	0.063251443	0.206993458	0.613511202	0.17772446	0.327321692	0.061361886	0.373997033	0.155521817	0.568919374	0.565244141	0.020134903	0.642779792	0.360787959
E06000027	2016	0.154162845	1.127720426	1.058443092	0.181324996	0.689042392	0.368409279	1.040055831	0.924213514	0.275854046	0.250299045	0.973634705	0.394294464	0.442004291	0.044560845	2.490937553	0.011182634	0.36681347	0.128150706	0.142407968	0.553503359	0.167252883	0.729187196	0.071568691	0.519958638	0.911476397	0.454591239	0.313710564	0.204842728	0.2314875	0.054141111	0.069137033	0.010202316	0.260929474	0.212170758	0.262754873	0.072854814	0.223479825	0.683099237	0.185995387	0.362203374	0.073251858	0.392220576	0.179601526	0.619265046	0.615384777	0.020566412	0.694350687	0.412483149
E06000028	2016	0.159630681	1.020789171	0.941914656	0.182221574	0.606017946	0.355993118	0.962286373	0.829030213	0.239852955	0.226838657	0.929817411	0.362889962	0.373413358	0.039286745	2.220398951	0.009945795	0.337265193	0.1195132	0.127223908	0.496945901	0.161468539	0.626520434	0.084697319	0.478044666	0.837585451	0.417460431	0.290850427	0.177760003	0.202987086	0.056627673	0.065706344	0.008301086	0.244772291	0.192893881	0.238318579	0.062983635	0.219415821	0.608260565	0.180295263	0.338065727	0.063215253	0.386558903	0.155547977	0.57936716	0.567946367	0.022573769	0.6450576	0.343239858
E06000029	2016	0.155969808	1.09445337	1.022293208	0.184167615	0.661107635	0.370315465	1.025298668	0.903452071	0.262290443	0.243340516	0.968127785	0.388525454	0.419142458	0.042635942	2.421924216	0.011461838	0.356562928	0.126642205	0.140635534	0.538473457	0.163585202	0.697277214	0.081988636	0.513408723	0.898238249	0.446233055	0.307976257	0.195405033	0.221969109	0.055245494	0.067438129	0.009435986	0.257557809	0.206460033	0.257243656	0.070495381	0.226026968	0.669178424	0.187483538	0.355580828	0.070002309	0.397099729	0.169766801	0.61021637	0.602584945	0.019749439	0.681265746	0.387252326
E06000030	2016	0.176314066	1.019697852	0.961681964	0.185622968	0.602180221	0.355738144	0.992600726	0.822653826	0.242350365	0.252947887	0.956650956	0.356336057	0.368000441	0.040201552	2.167914617	0.011149315	0.353104457	0.128801134	0.128283974	0.489687219	0.168423102	0.620736078	0.103890647	0.493031305	0.840723426	0.421570523	0.298857931	0.175470889	0.200822922	0.062690637	0.068063847	0.007291803	0.254150247	0.199490037	0.247618326	0.062344437	0.224291291	0.624339673	0.192060443	0.351239282	0.060821749	0.40524274	0.155707956	0.605189869	0.583464494	0.029429209	0.655944302	0.339980023
E06000031	2016	0.16517238	0.947154085	0.889242128	0.176241183	0.558786068	0.329870608	0.92245599	0.758760791	0.226866825	0.226690932	0.870687837	0.330505865	0.336741121	0.036726242	2.012483799	0.010155103	0.316552334	0.111286281	0.112549659	0.452225332	0.165412389	0.576593289	0.105943118	0.44833038	0.762286394	0.389949868	0.271356117	0.159227924	0.186286711	0.055151032	0.066271382	0.006853263	0.233097777	0.186374958	0.2261552	0.058502601	0.200340833	0.56367503	0.175667367	0.314635302	0.054764862	0.357111327	0.141227594	0.545672834	0.533714891	0.027759884	0.585814188	0.315268722
E06000032	2016	0.220841978	0.82895314	0.798588238	0.165012593	0.499778187	0.261179125	0.854146435	0.59076384	0.195897507	0.307883222	0.848889907	0.248168315	0.235124305	0.04374934	1.516179985	0.011777641	0.373439015	0.121138259	0.099883092	0.394139623	0.198382724	0.48843249	0.149889933	0.420343727	0.612011769	0.343892996	0.274452956	0.141756747	0.159958321	0.07427283	0.077821914	0.004719371	0.248925975	0.194370974	0.211473701	0.054573261	0.212697768	0.504297277	0.198780468	0.325286209	0.049278618	0.348671636	0.127478198	0.555004085	0.524300587	0.056622129	0.507948215	0.251641513
E06000033	2016	0.158003508	1.038630092	0.972940443	0.180768181	0.619556425	0.360698645	0.98659131	0.854769168	0.246774019	0.234818649	0.941091259	0.367097139	0.389325462	0.040583966	2.263909833	0.011314897	0.340956987	0.123134168	0.132985136	0.503189326	0.16557356	0.646842681	0.095042105	0.489625565	0.857779587	0.425520753	0.294382526	0.181666253	0.2076108	0.056183616	0.066379129	0.008612389	0.248569809	0.197893575	0.244554104	0.064742608	0.218355798	0.634433071	0.181958509	0.344280485	0.064265061	0.386416473	0.157714496	0.586112676	0.577653048	0.021167798	0.650268764	0.358006726
E06000034	2016	0.174261457	0.98062919	0.907132542	0.17475706	0.562498193	0.343967778	0.950504664	0.791396344	0.22802244	0.237554657	0.908802493	0.339911901	0.345794607	0.041165165	2.040756769	0.013706666	0.318466236	0.119476752	0.122658034	0.469602103	0.166906537	0.596590554	0.122514224	0.461726994	0.795306629	0.399050857	0.284241217	0.163366572	0.192596289	0.06032684	0.071181979	0.007080528	0.241397485	0.195852414	0.235557239	0.059985511	0.210512376	0.596159752	0.17850577	0.329114632	0.056898092	0.376684016	0.144769243	0.571122724	0.55309817	0.025202562	0.615608193	0.322491544
E06000035	2016	0.171201455	1.014488231	0.942650828	0.181024964	0.591024166	0.353243806	0.976059453	0.824478064	0.238469654	0.237688926	0.939746432	0.355050749	0.369325141	0.040307138	2.155430251	0.012666575	0.333959065	0.125786649	0.12877937	0.488821784	0.161498974	0.622939339	0.103577266	0.479637623	0.834474612	0.412314344	0.29278799	0.17362523	0.200476838	0.059573768	0.069705953	0.007610734	0.248793372	0.198353093	0.243570585	0.062441449	0.217967343	0.621699145	0.183017019	0.342087079	0.060313718	0.39301344	0.151883907	0.588388157	0.571861179	0.022788591	0.643692467	0.341022907
E06000036	2016	0.171495054	1.031719822	0.971392553	0.18816184	0.604367204	0.370932214	1.010353508	0.855495837	0.240749438	0.238460202	0.987163699	0.373373592	0.376728081	0.040345366	2.214659476	0.011825959	0.346671679	0.131883482	0.13786686	0.503115291	0.158619042	0.631687933	0.112746974	0.50511653	0.883043468	0.42854619	0.299600371	0.178567193	0.199370182	0.063088576	0.065990371	0.007595419	0.257549094	0.200049709	0.253726125	0.064199611	0.233699861	0.660428125	0.190814008	0.361916049	0.061823858	0.422113251	0.157684117	0.620909063	0.595084417	0.023268783	0.6814151	0.341688323
E06000037	2016	0.16385363	1.068436987	1.0099744	0.184670142	0.639834031	0.375317857	1.026146986	0.902444622	0.251134816	0.247193094	0.998960587	0.384962534	0.405353153	0.041448409	2.307494896	0.012612848	0.361575793	0.137497047	0.147261933	0.524508899	0.156242265	0.665882712	0.096524146	0.517782394	0.918276349	0.443701367	0.308083843	0.192492445	0.208826187	0.061284601	0.065901202	0.008680065	0.262110856	0.203762469	0.262444714	0.067981318	0.241465975	0.697393016	0.19253616	0.381939184	0.066967824	0.429473374	0.168768535	0.640834296	0.61505113	0.022334468	0.705183765	0.367237514
E06000038	2016	0.188864582	0.926034364	0.861065405	0.177790042	0.537960913	0.31801938	0.911937665	0.732506574	0.212698436	0.258156463	0.912611768	0.316467488	0.301184926	0.041090089	1.861295374	0.012940989	0.352737598	0.126825419	0.117807774	0.443109524	0.1766175	0.540768366	0.132142503	0.456925976	0.752551541	0.386024439	0.284376501	0.15522776	0.179293803	0.069062836	0.071000738	0.006112076	0.249724552	0.194291032	0.225023761	0.058011626	0.225157313	0.567740097	0.191020341	0.336681033	0.054510243	0.390642651	0.13978556	0.5821585	0.551722404	0.037266384	0.594942192	0.287229608
E06000039	2016	0.236050384	0.780705549	0.816035831	0.169716721	0.489826404	0.24557292	0.850613114	0.532336555	0.198045114	0.323325606	0.850179187	0.224487888	0.204123115	0.041003416	1.362389443	0.01297103	0.41732843	0.129131224	0.098119621	0.367202836	0.210154049	0.441297019	0.17337541	0.422593482	0.585449129	0.339966312	0.281494561	0.135118247	0.146898352	0.084840241	0.078073019	0.00366496	0.260884956	0.195502631	0.213118294	0.051741094	0.226349074	0.500385649	0.212421346	0.343018698	0.047796272	0.365808396	0.127158786	0.584044752	0.53596371	0.072837722	0.51098265	0.226443934
E06000040	2016	0.179034117	1.014861537	0.982261278	0.182407975	0.630279608	0.347217626	0.989697869	0.858887476	0.245069801	0.281167448	1.014367769	0.355939756	0.372027205	0.043776982	2.119073107	0.01461823	0.397936668	0.153263926	0.147630948	0.502278033	0.167921586	0.623531419	0.113727543	0.520571986	0.883336383	0.43363097	0.311824661	0.19027723	0.198444607	0.072045215	0.070539721	0.008482265	0.279733024	0.202633799	0.254898695	0.066537997	0.258597517	0.700574361	0.208622757	0.403719774	0.068348167	0.442512294	0.167555394	0.660541659	0.622873784	0.03237925	0.678533817	0.33745299
E06000041	2016	0.164460763	1.051314064	0.99296197	0.185076371	0.640143651	0.373368806	1.011631042	0.908174796	0.25108795	0.251447159	1.013074213	0.37941034	0.402925024	0.041275267	2.246828224	0.014816222	0.369052121	0.143589352	0.148369013	0.511808703	0.15699355	0.650977436	0.107859194	0.514761422	0.923030432	0.441850177	0.304089311	0.192545185	0.205095893	0.064153862	0.066746997	0.008909091	0.267463404	0.199884562	0.255230452	0.067262644	0.244474108	0.704957223	0.196562354	0.389313414	0.066473832	0.429478236	0.166419946	0.644563935	0.611271207	0.022417568	0.685661278	0.354482053
E06000042	2016	0.182837848	0.973444484	0.916005202	0.180314614	0.564750473	0.339307623	0.954710224	0.781257252	0.226221323	0.249064673	0.93472358	0.336790481	0.338365784	0.040170598	2.002901137	0.012968556	0.337300499	0.124802743	0.121085755	0.462664403	0.170606878	0.584887137	0.125433542	0.467129778	0.797320547	0.399609886	0.287269226	0.163655701	0.188679012	0.064310476	0.069553248	0.006730942	0.248300563	0.195543115	0.237479143	0.059858038	0.217255539	0.599928201	0.187303171	0.341929764	0.056108144	0.389121421	0.145676426	0.590066622	0.56484583	0.031944863	0.622083255	0.317545276
E06000043	2016	0.17204702	1.00543104	0.932588678	0.188063889	0.589925009	0.351011754	0.96097589	0.808907134	0.229540774	0.247256131	0.962199611	0.358579363	0.353804838	0.040264051	2.115755556	0.010344477	0.350223239	0.124215158	0.126662929	0.472603148	0.170634785	0.598413594	0.092069553	0.481048643	0.837607208	0.412137205	0.298786874	0.174644583	0.198315685	0.065118237	0.066286769	0.007602637	0.250021259	0.197285071	0.238942882	0.060105963	0.229936	0.610560648	0.190664776	0.356101245	0.060016344	0.403149579	0.151212811	0.594849079	0.573998939	0.029018225	0.64913462	0.326295384
E06000044	2016	0.160839916	0.975892081	0.895904378	0.180026344	0.564751006	0.342914971	0.930976592	0.777505262	0.22608955	0.212583034	0.893035171	0.344998378	0.351957438	0.03658518	2.090321859	0.010656245	0.305713756	0.110899257	0.116685794	0.461911049	0.156324138	0.593409582	0.091592255	0.451599522	0.788511946	0.394327364	0.275923189	0.162779244	0.193987745	0.054165313	0.063085192	0.007189117	0.230437775	0.186634535	0.228673115	0.058547561	0.203457196	0.577407516	0.17242649	0.312567175	0.05576818	0.366921661	0.142659036	0.547987096	0.536715415	0.021347948	0.60616916	0.322109666
E06000045	2016	0.171304901	0.947005571	0.871973567	0.177506631	0.551351761	0.327443615	0.908607968	0.745608181	0.220576745	0.226631719	0.88515854	0.329652134	0.330247311	0.036973691	2.004092216	0.010655054	0.319920759	0.111797337	0.111952762	0.452436079	0.161844637	0.567587854	0.099479146	0.441968065	0.756138312	0.385433068	0.275181745	0.158654475	0.186621932	0.056743497	0.065993233	0.006674161	0.232106367	0.18488847	0.221574282	0.056600212	0.205397656	0.554143511	0.176981037	0.313679234	0.054470204	0.362997507	0.139168271	0.544434379	0.533220647	0.027221018	0.592202962	0.306687308
E06000046	2016	0.153685054	1.146988207	1.082754124	0.183002759	0.699918279	0.374541563	1.057278981	0.956743886	0.281513672	0.260550473	1.002776158	0.404028784	0.454357502	0.045591458	2.524338254	0.012313722	0.382172026	0.134988198	0.149188614	0.564585411	0.171921239	0.742221491	0.071005311	0.532081839	0.941474955	0.464979811	0.322884908	0.21226045	0.236587767	0.055673638	0.072292723	0.010717176	0.267738052	0.218304877	0.267139665	0.07458671	0.230171741	0.70828996	0.189482571	0.382713246	0.075300086	0.403756017	0.18467187	0.635492233	0.632379342	0.020315248	0.715007851	0.423866412
E06000047	2016	0.150280509	1.070280287	0.997854238	0.182943954	0.634391799	0.368467019	0.99881354	0.887623001	0.260266135	0.224782758	0.936650393	0.380340956	0.419840758	0.039506138	2.37651737	0.011771159	0.331924256	0.12355556	0.132305251	0.516149675	0.156099695	0.678428984	0.07170831	0.495472232	0.877476533	0.432613401	0.295014756	0.185908075	0.217271779	0.050292685	0.065455957	0.008999999	0.248275326	0.198277502	0.248823707	0.066631589	0.209192896	0.64465899	0.178764103	0.336831489	0.064997734	0.384588124	0.16244522	0.586861897	0.583982259	0.016968192	0.665227199	0.381355444
E06000049	2016	0.152673351	1.083468224	1.01837498	0.181260559	0.650540146	0.368934699	1.017837522	0.901906927	0.258685709	0.24166568	0.966633189	0.386502495	0.419647967	0.041636115	2.382594192	0.011640267	0.353422148	0.129138364	0.140049138	0.527121722	0.160228111	0.68696095	0.079329711	0.507854768	0.900683404	0.442488875	0.30422981	0.19408372	0.219201395	0.055011712	0.065768096	0.009277167	0.25590422	0.204227958	0.256259434	0.068958309	0.221368035	0.671749341	0.185475339	0.359888676	0.068209804	0.39734112	0.168868254	0.60819199	0.597673679	0.019292764	0.681137084	0.384290544
E06000050	2016	0.152481926	1.063245589	0.99432241	0.179638372	0.63648318	0.365890875	1.001951261	0.880145733	0.253208203	0.233281841	0.948974036	0.377716197	0.409527482	0.040438226	2.347566715	0.011297687	0.343434358	0.126475507	0.13737931	0.520458124	0.151000313	0.674150483	0.075824244	0.501563543	0.88258493	0.432371323	0.297640991	0.188560993	0.213645021	0.053428357	0.063945225	0.008810174	0.251000399	0.198380076	0.252064011	0.06735513	0.219532884	0.657743132	0.183007644	0.348583877	0.066341845	0.395771229	0.163992673	0.598755571	0.586618002	0.018513337	0.671348941	0.373189342
E06000051	2016	0.152280073	1.091884614	1.018159538	0.179063163	0.656260357	0.365585886	1.016218087	0.921555174	0.263852847	0.246643712	0.966558932	0.390872255	0.421517658	0.042090697	2.3966211	0.011372238	0.35798969	0.130902199	0.142858221	0.536000907	0.159450923	0.69797144	0.075695732	0.511134461	0.905153899	0.445633955	0.306959072	0.199052882	0.221237324	0.054978624	0.066717759	0.009677947	0.25454916	0.20572052	0.25709214	0.069689215	0.224034046	0.673950795	0.183943261	0.364897577	0.069490869	0.399100374	0.171976591	0.611157521	0.60202256	0.018942587	0.685757799	0.390507896
E06000052	2016	0.154552897	1.134307364	1.060656227	0.184341629	0.680704762	0.376876676	1.051568088	0.952185206	0.276432443	0.254296021	1.000282982	0.405825563	0.440292448	0.043534969	2.488870186	0.011335989	0.370267543	0.132632478	0.146558516	0.555083218	0.165818962	0.728936398	0.074501901	0.526287345	0.938041302	0.45946658	0.318316534	0.207569797	0.230958314	0.056336201	0.070314434	0.010203156	0.260229763	0.213886589	0.265417278	0.072515927	0.229132292	0.697221352	0.186592128	0.378630751	0.072266112	0.407211512	0.181292161	0.629958808	0.622639548	0.01976378	0.716100564	0.41286893
E06000053	2016	0.162716147	1.096064183	1.047822933	0.185353065	0.687909383	0.391459012	1.077792733	0.926609279	0.273998864	0.282198921	0.988023502	0.389839683	0.392961911	0.052766548	2.400011014	0.019468841	0.434918598	0.143000362	0.12466383	0.550012133	0.138825358	0.727939733	0.079819669	0.549693423	0.988865443	0.451742287	0.336319045	0.183088635	0.219317267	0.06437967	0.058787874	0.007563282	0.267009032	0.225258493	0.276215728	0.07550472	0.261668192	0.680258182	0.219822413	0.438147576	0.071484182	0.415153671	0.179548445	0.656495152	0.637910844	0.020132697	0.70428346	0.388083749
E06000054	2016	0.162695258	1.096919131	1.030071741	0.184566036	0.65761987	0.371984388	1.042475094	0.914453751	0.264084406	0.251087657	0.986484496	0.393587119	0.414560502	0.042653911	2.394824318	0.011124495	0.36147243	0.131732882	0.143141937	0.537615659	0.161824441	0.695621583	0.086434858	0.518677565	0.912066821	0.450818513	0.310039988	0.196627491	0.219730888	0.057361344	0.067886278	0.009103292	0.259782506	0.209024127	0.263375702	0.069907908	0.22927643	0.683915426	0.19130542	0.366371486	0.0685177	0.411376464	0.171125171	0.626802408	0.610130923	0.021491309	0.694525956	0.384962535
E06000055	2016	0.169140136	1.00055121	0.947957009	0.179299353	0.60143995	0.341509763	0.974981766	0.814772267	0.238243226	0.251649703	0.943671345	0.353147344	0.362594163	0.040016523	2.115817088	0.011276864	0.362845895	0.129550728	0.131498979	0.485345224	0.165963682	0.612386118	0.107251734	0.484340945	0.834164388	0.418438812	0.295354605	0.177473248	0.197248006	0.063446478	0.070062894	0.007654929	0.255755336	0.198230661	0.244734204	0.062603552	0.2255087	0.624879666	0.189730845	0.358299877	0.062787115	0.398182017	0.156905483	0.601199909	0.578203109	0.0288489	0.646520927	0.337097673
E06000056	2016	0.164427979	1.046160413	0.979055395	0.180685494	0.618517476	0.366705837	1.003656863	0.874097798	0.247710042	0.240866646	0.969486022	0.373470804	0.39334513	0.041079912	2.258805979	0.012469516	0.346338376	0.132138843	0.140577632	0.511899737	0.154554435	0.65279627	0.096553998	0.49846951	0.882517015	0.429318659	0.299720957	0.183504931	0.206686882	0.059355656	0.066775842	0.008198048	0.255500384	0.199865354	0.253459233	0.065811764	0.226838502	0.66191177	0.185956639	0.359739036	0.064197463	0.410789523	0.161648252	0.61455193	0.594421309	0.021179971	0.675371559	0.357318462
E06000057	2016	0.151806461	1.105222371	1.036310855	0.181243813	0.662625976	0.371607852	1.027026008	0.917197549	0.270151815	0.243048224	0.970772794	0.391396147	0.434132122	0.041817098	2.447502653	0.011795509	0.353202322	0.128973415	0.139912468	0.539934067	0.158502967	0.709273511	0.069059488	0.513178556	0.90816594	0.445317622	0.306323078	0.197004712	0.224671028	0.05240362	0.067622356	0.009657172	0.256186434	0.2061647	0.259816093	0.070517679	0.217299094	0.675378436	0.18444697	0.357251713	0.069549166	0.397340846	0.173626074	0.61099983	0.605039017	0.018518645	0.690708918	0.400013719
E07000004	2016	0.1630713	1.062033563	0.999887226	0.185705509	0.625786124	0.373926787	1.02369669	0.883437336	0.249820535	0.244612615	0.979272757	0.380511846	0.396215396	0.040584371	2.29698052	0.011461603	0.351337249	0.130749843	0.138108046	0.513963512	0.162111429	0.658313817	0.096339026	0.507885982	0.898860188	0.438627129	0.301344696	0.185838538	0.209515753	0.058621957	0.065744094	0.008288116	0.256070388	0.202435469	0.25696842	0.066448184	0.226861084	0.667775693	0.189823468	0.362873744	0.064696687	0.413495802	0.163516328	0.615613613	0.595494491	0.022059683	0.684480195	0.362353402
E07000005	2016	0.173893313	1.070403779	1.022564975	0.182018203	0.654224384	0.359416452	1.034865399	0.906277773	0.252234759	0.291339886	1.014400531	0.382070855	0.388844964	0.047159242	2.236167601	0.012568272	0.405377849	0.146572177	0.15559683	0.527867073	0.177656559	0.673118134	0.102447545	0.525616996	0.916038747	0.449074318	0.322237826	0.204353582	0.21474304	0.070464261	0.074665522	0.009284717	0.278565391	0.219620854	0.263776997	0.070899938	0.252127097	0.70885192	0.202123535	0.406553587	0.072362036	0.435116806	0.173587753	0.653684925	0.625850817	0.029119484	0.689522819	0.369564818
E07000006	2016	0.189070648	1.05115568	1.008718361	0.181432803	0.646066822	0.340631636	1.02301566	0.858979681	0.245198237	0.305231039	1.005923095	0.360630285	0.368222418	0.049155949	2.162690403	0.014113938	0.41726216	0.149954784	0.150179009	0.518358082	0.183288534	0.653355686	0.106745347	0.526404613	0.876150668	0.441098702	0.321595292	0.197763444	0.211109254	0.072474867	0.076828306	0.008611595	0.285884262	0.220438292	0.262360922	0.070146648	0.250953476	0.682909122	0.208957554	0.403270135	0.072588072	0.432994152	0.169662403	0.655212788	0.625056057	0.03548206	0.678263119	0.35486448
E07000007	2016	0.182974166	0.995768487	0.948658918	0.17819437	0.602184175	0.339387661	0.978457103	0.811398779	0.23539418	0.267454575	0.964089545	0.349807551	0.352690307	0.04310559	2.078409993	0.013388179	0.373771642	0.134630411	0.137408249	0.491462698	0.163214402	0.615933978	0.112460663	0.492581634	0.828455913	0.412810554	0.300682572	0.178329184	0.195249132	0.067451828	0.072863047	0.007506495	0.26362059	0.201273088	0.247901859	0.064171021	0.241220354	0.646895763	0.197205666	0.36794683	0.063635866	0.414376779	0.157828478	0.621382643	0.595339832	0.029959446	0.648724598	0.331754328
E07000008	2016	0.1685545	0.951470463	0.874645009	0.179877917	0.563758448	0.330794699	0.909493999	0.77696692	0.213268525	0.225481874	0.923961808	0.345144597	0.331951143	0.037286265	2.008335293	0.011475055	0.344299597	0.120956526	0.12245551	0.455416405	0.158121639	0.559882479	0.109359481	0.456693646	0.799179782	0.396004699	0.287471373	0.1628646	0.184925204	0.066149359	0.065334196	0.006811532	0.244251282	0.186721018	0.226039075	0.056871804	0.225924604	0.582559229	0.18364845	0.345105799	0.056704834	0.3926575	0.144297016	0.580998349	0.557004763	0.026928212	0.626779662	0.301482862
E07000009	2016	0.150035299	1.06093299	0.992832134	0.182061339	0.624924086	0.37073471	1.004813555	0.904887073	0.25779623	0.234217196	0.970408047	0.392142352	0.406573236	0.03960365	2.314385227	0.011028109	0.343751203	0.12850942	0.139673048	0.512716079	0.163387305	0.665610907	0.090661801	0.497220516	0.903847987	0.439832224	0.300579021	0.190326715	0.211875491	0.056044045	0.06551289	0.009263434	0.245534997	0.199899962	0.250043609	0.066436322	0.220163085	0.666866284	0.180606359	0.36117716	0.064618926	0.400478398	0.165019858	0.60316255	0.590613191	0.019175436	0.677990093	0.371564357
E07000010	2016	0.150195159	1.076733424	1.002751491	0.179689524	0.642797374	0.363548693	1.00528221	0.899110876	0.26469403	0.237625178	0.950869449	0.386757093	0.41899549	0.041044551	2.376535152	0.011699868	0.347361846	0.127285143	0.13848327	0.52815292	0.16273893	0.685806681	0.078200263	0.501769735	0.888057354	0.440059428	0.302916213	0.19251094	0.219425224	0.052859466	0.067532457	0.009678033	0.249937753	0.20287261	0.251058896	0.068501103	0.21731786	0.658425437	0.180454502	0.350651945	0.067500715	0.390634469	0.16764247	0.597897538	0.592363509	0.018240798	0.674211425	0.385325452
E07000011	2016	0.160536971	1.066966076	0.997478597	0.182617465	0.627989249	0.373939639	1.011884723	0.894351101	0.25468116	0.238919975	0.96774126	0.380042474	0.407851172	0.039736011	2.329537893	0.012461039	0.343445895	0.12931803	0.13818078	0.517306854	0.156122914	0.668524987	0.08794825	0.502207947	0.891852631	0.439132096	0.30133067	0.185218006	0.212003659	0.056180329	0.065103496	0.008377042	0.252902519	0.200320756	0.256530159	0.0661536	0.222052477	0.663515455	0.187132271	0.352571585	0.064265262	0.407129407	0.164090301	0.612857269	0.596654812	0.019707023	0.68279165	0.369512608
E07000012	2016	0.161725851	1.039123603	0.979706029	0.17969203	0.622768317	0.365304584	1.00298524	0.898400409	0.248781504	0.246227388	0.996201169	0.380995145	0.391213999	0.042186426	2.234117431	0.011904663	0.365134419	0.142524975	0.152593454	0.520785846	0.147598108	0.649236372	0.096861933	0.512158452	0.917537388	0.436832332	0.304553467	0.192750161	0.201824725	0.063037245	0.064585697	0.008434724	0.262594417	0.200453653	0.260055082	0.067079853	0.247211116	0.704502201	0.190892344	0.388933856	0.067868501	0.436481219	0.167494844	0.646598538	0.609284977	0.021171643	0.698276943	0.35514498
E07000026	2016	0.152904605	1.103231894	1.032525628	0.179484583	0.669460886	0.372045933	1.02809706	0.920301224	0.265137386	0.245695034	0.980161973	0.390591414	0.432587038	0.043133143	2.446114236	0.011794165	0.363824417	0.137676233	0.147912394	0.550513309	0.153700458	0.703042856	0.074275093	0.518514907	0.920857645	0.448816568	0.310972052	0.198430007	0.222009103	0.056241525	0.065397577	0.009512014	0.263918204	0.204795767	0.266726786	0.071278404	0.232471001	0.688907547	0.186961443	0.371285608	0.07182391	0.413652342	0.175045439	0.629563183	0.615082381	0.01916743	0.702184652	0.390963674
E07000027	2016	0.154110179	1.069527906	0.99211576	0.179979753	0.632789479	0.366172394	0.997270623	0.87537523	0.254100002	0.231578914	0.939121549	0.372858212	0.414489888	0.041150156	2.362513002	0.012215539	0.335419507	0.123503542	0.13293138	0.520650299	0.157958833	0.679814329	0.074388297	0.494788323	0.866345156	0.426102497	0.295698219	0.186213358	0.215555026	0.053754664	0.066462512	0.008976605	0.248110521	0.200340746	0.249710908	0.066834069	0.212763211	0.645087817	0.176283911	0.342071448	0.065395587	0.384044411	0.163529668	0.58473015	0.580510505	0.018051144	0.663502557	0.377842961
E07000028	2016	0.146928965	1.063825741	0.991634009	0.183668431	0.631598264	0.362349178	0.990489155	0.881160227	0.257508409	0.223277869	0.930666936	0.380898479	0.412385782	0.038912944	2.373986309	0.010722188	0.325960181	0.119022301	0.12808118	0.514224443	0.162115797	0.672590344	0.072407896	0.49129009	0.867382175	0.433742826	0.292946763	0.186936855	0.215975985	0.050254249	0.064239316	0.008953341	0.239542611	0.198042114	0.247042366	0.066567887	0.206019623	0.635558784	0.175777941	0.339113029	0.0639205	0.375024609	0.16329015	0.577750343	0.575397835	0.018381057	0.657755806	0.380210815
E07000029	2016	0.144632702	1.092108101	1.02079096	0.180071306	0.659107107	0.376598079	1.006205393	0.921312396	0.263334846	0.231575761	0.964162599	0.387087352	0.437228735	0.041721868	2.431936327	0.013067739	0.352246644	0.131863364	0.143069177	0.5277473	0.159628501	0.692703241	0.07283856	0.505789889	0.908381611	0.441821198	0.301751412	0.198160487	0.219802581	0.051938441	0.068305321	0.009764993	0.256750887	0.200601269	0.252335723	0.068591676	0.214490678	0.672938166	0.180067722	0.360176031	0.068873424	0.393713623	0.16811986	0.602739591	0.602225298	0.016040885	0.682624367	0.391643943
E07000030	2016	0.154822059	1.122278702	1.046395782	0.178725262	0.679114804	0.370809756	1.039661454	0.944730893	0.268484806	0.257482919	0.981560653	0.40382533	0.428054451	0.043019058	2.473636233	0.010284766	0.364907664	0.131002477	0.146513401	0.553514836	0.153530557	0.728633402	0.070354489	0.524604495	0.930107239	0.454329881	0.314924255	0.2049405	0.226877935	0.056326185	0.067030948	0.009525441	0.25822757	0.211676428	0.267903815	0.072854531	0.229673456	0.699386878	0.184220599	0.374416659	0.07233203	0.408973698	0.180163715	0.628810999	0.616151144	0.019457284	0.708122035	0.406787899
E07000031	2016	0.154012107	1.141015031	1.069973117	0.178874333	0.69985127	0.37240634	1.050812438	0.961384091	0.277881354	0.265350681	1.01722254	0.409015453	0.447876255	0.04621825	2.519255556	0.011966616	0.390809575	0.142686528	0.157619903	0.573591675	0.160136079	0.743599393	0.06813428	0.542621618	0.958575113	0.464146289	0.327221833	0.213993132	0.234653055	0.058486326	0.069403478	0.010437519	0.270514197	0.215993827	0.273254047	0.075818574	0.241644831	0.722325953	0.18900546	0.39455419	0.077019966	0.423432724	0.18660113	0.64836727	0.637777263	0.018760972	0.72962616	0.415544941
E07000032	2016	0.151467549	1.101405658	1.029267761	0.18220225	0.653931899	0.379621274	1.032752908	0.920662953	0.263832759	0.236811877	0.982705896	0.395150051	0.431835319	0.040706963	2.437901687	0.01115767	0.349833946	0.13117781	0.143154481	0.541779284	0.149975824	0.703290814	0.071629536	0.514305313	0.923316254	0.444468895	0.306870626	0.19578125	0.220759091	0.053809464	0.064143734	0.009290853	0.255802588	0.202899273	0.264528605	0.069548301	0.224986951	0.684172384	0.184520268	0.365265217	0.068476593	0.412837883	0.172458576	0.622200909	0.605180296	0.017814991	0.706385955	0.389681584
E07000033	2016	0.155068883	1.073638875	0.992010924	0.18356696	0.629621532	0.370911174	1.009411267	0.887581884	0.261599651	0.224816493	0.940155818	0.38065159	0.411748663	0.039488041	2.380719656	0.010235438	0.326425733	0.123616833	0.130169651	0.526786411	0.152282876	0.683175206	0.070820685	0.498282533	0.876153776	0.430072093	0.295295513	0.183859502	0.215105315	0.052153624	0.062868858	0.008556088	0.243511816	0.196530277	0.252388383	0.066158337	0.21124623	0.639013485	0.179567888	0.336939647	0.063327002	0.390383098	0.164032156	0.591981639	0.583854144	0.019075063	0.66721663	0.375724681
E07000034	2016	0.159604935	1.083980129	1.00880429	0.184457284	0.646438071	0.370793657	1.009036395	0.895209638	0.262578065	0.235008236	0.947466246	0.380609147	0.419495662	0.040938408	2.397372636	0.011394098	0.338085037	0.122994569	0.133339748	0.524215057	0.162372013	0.68490175	0.075529631	0.50035686	0.869577268	0.435206978	0.301326069	0.186217352	0.220555347	0.053496983	0.067417765	0.008875085	0.25184245	0.202164125	0.255864529	0.066975547	0.213200896	0.63957975	0.184118717	0.342571998	0.065292665	0.387148886	0.165729995	0.595581949	0.592571497	0.021041132	0.667348656	0.382318124
E07000035	2016	0.154550368	1.149183595	1.083696804	0.180131704	0.702507105	0.37927009	1.061872589	0.97416443	0.275886076	0.267187597	1.019526874	0.409076458	0.454185584	0.046182785	2.539226162	0.012916721	0.384144056	0.141151256	0.156612984	0.569001359	0.161242613	0.746313547	0.070634752	0.54111467	0.962737866	0.464887761	0.326338293	0.21336014	0.234917223	0.057691119	0.069035431	0.010172143	0.272426112	0.217075189	0.277092151	0.074959695	0.23984954	0.725486069	0.191951976	0.39751626	0.076183061	0.422500562	0.186116078	0.652840081	0.642966173	0.01899249	0.733143548	0.417955142
E07000036	2016	0.158505302	1.056051386	0.984088711	0.182592489	0.628700533	0.368386799	1.008543229	0.881974101	0.252775928	0.232989664	0.959029531	0.37963326	0.398417153	0.040652153	2.323044823	0.009800825	0.34147749	0.131418242	0.13939559	0.526824249	0.141841464	0.667078528	0.078329716	0.507599538	0.889364059	0.429754205	0.29769741	0.1863894	0.208615841	0.056032836	0.06324894	0.008231215	0.251529327	0.196925828	0.257909253	0.067048353	0.229233333	0.661111898	0.183177664	0.355300926	0.065889202	0.416472673	0.1652543	0.615538066	0.592968283	0.020120677	0.68206919	0.364752527
E07000037	2016	0.157020414	1.091100682	1.022486657	0.183921873	0.64637229	0.373321933	1.0211878	0.900411741	0.260248979	0.238687289	0.961280404	0.38722937	0.417336761	0.040138817	2.406014245	0.011224302	0.340346095	0.124374602	0.13580013	0.524176462	0.1552644	0.693352643	0.074060265	0.507879152	0.895063541	0.44079409	0.301482751	0.188275683	0.218871353	0.053994532	0.065523182	0.008631161	0.252018411	0.203801315	0.258717056	0.068255187	0.216544789	0.664541441	0.185406509	0.346839418	0.065930971	0.397229233	0.167746619	0.606512207	0.596692076	0.018984462	0.684886995	0.385296843
E07000038	2016	0.160679292	1.105210756	1.034418299	0.181896036	0.665739525	0.368343777	1.035070605	0.928151168	0.270448918	0.257278204	0.989330964	0.392742437	0.425357748	0.043957161	2.42288386	0.011263398	0.371694506	0.136765718	0.146000567	0.548903591	0.158637164	0.709545244	0.074224554	0.523710766	0.917281593	0.449106899	0.314149234	0.201173567	0.224415824	0.057664162	0.0686432	0.009735275	0.262150432	0.209410962	0.264465168	0.071477187	0.230869771	0.68735487	0.189550119	0.373940779	0.070479919	0.413661845	0.17690036	0.629043035	0.617741951	0.021484752	0.700207725	0.395219978
E07000039	2016	0.166129213	1.049418913	0.985892781	0.182744836	0.619685777	0.370831136	1.00710423	0.889982711	0.255543611	0.243113089	0.978294076	0.378568212	0.394226759	0.040022722	2.277628621	0.011769016	0.346490238	0.134291511	0.141799206	0.516182599	0.149398348	0.65725898	0.091451641	0.504646087	0.890920886	0.433597868	0.30188159	0.184665059	0.205358589	0.059495648	0.06553194	0.008086919	0.25640871	0.199819816	0.256080112	0.066041376	0.229614813	0.669001797	0.188927694	0.359985104	0.063732023	0.420304932	0.164108526	0.626853789	0.603425844	0.021986966	0.685747224	0.360406432
E07000040	2016	0.15718561	1.15170538	1.089323434	0.178814203	0.721212399	0.368607461	1.066198449	0.973581925	0.289159539	0.279467913	1.019936619	0.409251649	0.449255472	0.049490768	2.539547763	0.011394374	0.413758337	0.147788647	0.163490567	0.591276229	0.166007616	0.759401753	0.069031368	0.555005481	0.962491346	0.475519468	0.334809427	0.225447774	0.239355608	0.060278095	0.07204837	0.011429789	0.279749068	0.222813191	0.273864282	0.07951384	0.25096179	0.74099255	0.196666473	0.403664016	0.081925839	0.427721277	0.192302971	0.664784174	0.651560236	0.02136565	0.729200533	0.425066821
E07000041	2016	0.157705797	1.026172974	0.952284105	0.181107756	0.599808848	0.364649514	0.968444352	0.82683945	0.237014913	0.222019824	0.931453222	0.360190157	0.380378913	0.037679678	2.23108894	0.010591189	0.328334201	0.115180345	0.125668727	0.491713756	0.154828292	0.639856021	0.076635246	0.472526882	0.837889282	0.410164664	0.28739591	0.178750349	0.205852207	0.053016211	0.066044222	0.008191424	0.240963546	0.191882269	0.239757911	0.061672355	0.213480955	0.612546497	0.18003747	0.332912326	0.06190797	0.385036439	0.153248274	0.57135893	0.561702027	0.019482814	0.641790792	0.345747206
E07000042	2016	0.155567787	1.118810326	1.046130249	0.183851011	0.666939345	0.374778566	1.048862164	0.951587147	0.276562366	0.255981943	1.009858483	0.410855255	0.425759681	0.043259073	2.443931584	0.010436527	0.372261671	0.136714366	0.150869204	0.552800846	0.165278632	0.715150997	0.079479355	0.529429844	0.948538376	0.463510014	0.320690442	0.20847552	0.225518925	0.058944795	0.069011481	0.009937953	0.258894457	0.212957229	0.266454676	0.072229978	0.235257523	0.708972405	0.188961705	0.383749156	0.0717355	0.42093799	0.180163945	0.641582469	0.622324066	0.020409364	0.723529884	0.40243507
E07000043	2016	0.160287247	1.120696791	1.051925689	0.183032219	0.679930188	0.367735802	1.039003651	0.942895852	0.275968219	0.264319211	0.978322054	0.397459143	0.426925882	0.044703677	2.455444383	0.010885205	0.372095504	0.129867391	0.14288095	0.550805311	0.172151023	0.72228323	0.076899009	0.522204103	0.909771891	0.454010834	0.314435189	0.204379561	0.229349113	0.056312359	0.072603733	0.010142466	0.260155445	0.215089017	0.262667506	0.072878442	0.225276471	0.682964428	0.188823321	0.369225943	0.072230251	0.397275514	0.178830866	0.619917112	0.617971068	0.022213659	0.690523809	0.406781375
E07000044	2016	0.15965088	1.178721284	1.102309969	0.183120275	0.718371545	0.379228087	1.084646698	0.976653207	0.287057933	0.274257061	1.029596767	0.413684666	0.464647209	0.046964402	2.589337696	0.012260106	0.396985347	0.140179555	0.157848504	0.584270342	0.16539167	0.767860281	0.069815377	0.547253684	0.965851192	0.475696412	0.334249419	0.21861603	0.240343568	0.059045531	0.070990906	0.010567757	0.274483979	0.222282462	0.276638539	0.076617573	0.239206483	0.733748575	0.196283628	0.390000188	0.077392033	0.423759396	0.191674781	0.663222791	0.650393595	0.022259664	0.744017668	0.434520261
E07000045	2016	0.157078854	1.151300719	1.080746714	0.185503431	0.704294645	0.377362939	1.070432712	0.956305925	0.28246525	0.260552349	1.004703876	0.405691306	0.451182038	0.045170578	2.541772093	0.011394858	0.381579741	0.135525887	0.149922448	0.571040332	0.16321269	0.748563207	0.070894212	0.539436218	0.944877557	0.466446851	0.324508657	0.212277339	0.236485955	0.056575782	0.069864183	0.010334899	0.269052932	0.217238542	0.272879556	0.076003513	0.234067723	0.715142031	0.191875328	0.378144106	0.075332709	0.414386196	0.186723717	0.647967253	0.635798528	0.021180372	0.722041096	0.423296404
E07000046	2016	0.153512388	1.147875305	1.072420949	0.182059839	0.694245808	0.371632595	1.053049206	0.968117394	0.284190419	0.264205137	1.000689063	0.41037215	0.444855105	0.044958261	2.517434804	0.010927556	0.382368915	0.135637243	0.151312477	0.565720986	0.164908703	0.745601222	0.070529012	0.533990708	0.945082877	0.464442632	0.322431399	0.214411469	0.233466837	0.056349895	0.071155784	0.010523518	0.265018569	0.216851938	0.268961022	0.075733913	0.232264443	0.711724711	0.190491599	0.382448379	0.074924328	0.410591956	0.186569935	0.639833418	0.632299283	0.020300013	0.7192335	0.423216387
E07000047	2016	0.164651678	1.160297321	1.083160414	0.184680378	0.710058486	0.370719447	1.080943221	0.96090398	0.279464465	0.257488156	1.015213221	0.414291834	0.453294856	0.044326449	2.544190205	0.012197493	0.396605672	0.13637488	0.149657986	0.573017851	0.16367597	0.748557736	0.089829225	0.534216748	0.956704812	0.472575808	0.331071026	0.215399797	0.24105218	0.062274675	0.07615569	0.010473482	0.274080361	0.221534114	0.276628405	0.074711071	0.232344558	0.709247147	0.190876375	0.387635079	0.07612852	0.409128211	0.188042953	0.647243978	0.640211237	0.021210354	0.736327499	0.425250559
E07000048	2016	0.151041768	1.148096286	1.084171944	0.17720141	0.733144372	0.367811616	1.063062719	0.960400381	0.286077337	0.264376219	0.981586302	0.404544776	0.45158898	0.047918371	2.582532143	0.01179253	0.397573968	0.138235377	0.159574732	0.594723147	0.164438997	0.763358013	0.067368833	0.548051767	0.939519536	0.47503863	0.327193983	0.221940558	0.241513533	0.056364277	0.06854454	0.011531617	0.276159477	0.218467235	0.269393102	0.079747849	0.245152117	0.729240775	0.192683645	0.377914438	0.082088908	0.407872543	0.190469859	0.648825824	0.637046421	0.019316744	0.70462436	0.427360954
E07000049	2016	0.154658481	1.167959678	1.099310542	0.17768516	0.735862339	0.374244419	1.078723415	0.987736399	0.291344005	0.275608748	1.018871136	0.413772379	0.460780118	0.048668151	2.606910947	0.012662358	0.408589423	0.146092428	0.164866232	0.60261234	0.160798796	0.773975378	0.06691882	0.559940618	0.96678113	0.480411425	0.332818454	0.223337866	0.243573386	0.056929111	0.07056295	0.011241414	0.282302075	0.221832845	0.279478778	0.081912828	0.248717566	0.746732122	0.19731812	0.391416444	0.083221086	0.426075178	0.194102716	0.666496842	0.656402831	0.019056028	0.728230284	0.434303426
E07000050	2016	0.156224758	1.14111372	1.066768134	0.182389793	0.690571904	0.374987094	1.056324846	0.961372347	0.276473609	0.266857464	1.016228577	0.410742262	0.44119875	0.04449766	2.489736228	0.011570794	0.386323215	0.136693253	0.15236962	0.562517421	0.168814327	0.734863673	0.079064123	0.537125826	0.950853417	0.466202414	0.326210043	0.212450952	0.234085773	0.059971018	0.071933658	0.010401206	0.265889761	0.218266912	0.269419171	0.074952423	0.237278312	0.716605085	0.190676904	0.389218413	0.074727576	0.417896764	0.184308511	0.644932778	0.633228851	0.020931211	0.722294861	0.414597609
E07000051	2016	0.157782989	1.150940894	1.076783105	0.178946074	0.708807229	0.373048833	1.057098583	0.948401522	0.280814546	0.264523484	0.985448441	0.398498571	0.452871593	0.046340085	2.569755349	0.012303153	0.378661525	0.134775397	0.147884515	0.581158438	0.163187056	0.752503566	0.06892011	0.537503245	0.925113866	0.462549605	0.32111025	0.209708609	0.23687949	0.054394368	0.069335272	0.010301712	0.268578683	0.213322098	0.272432478	0.076719162	0.232277916	0.699000649	0.19179617	0.365270296	0.076589722	0.404849566	0.184472299	0.635973401	0.632193844	0.021363301	0.706206722	0.41817964
E07000052	2016	0.162133165	1.167846319	1.10377865	0.179385634	0.729508442	0.371693722	1.073243536	0.98122102	0.289640271	0.279934075	1.023333797	0.410301171	0.456275743	0.049038278	2.575726724	0.011831735	0.406998732	0.14373418	0.160107485	0.591449337	0.166943325	0.767803771	0.06780844	0.552311039	0.959451123	0.475838295	0.33505304	0.222964167	0.242814801	0.059619326	0.073152361	0.011049463	0.279243759	0.224431209	0.280420133	0.079588496	0.244714034	0.734065032	0.197443403	0.400374723	0.080957001	0.425947011	0.194644373	0.665033566	0.657189433	0.022726392	0.731755391	0.431030417
E07000053	2016	0.157275623	1.131659174	1.057800982	0.183784388	0.680568729	0.370399647	1.038925951	0.924525654	0.278129965	0.253687017	0.986083644	0.39520328	0.441942781	0.044397879	2.475876783	0.012575025	0.366648147	0.129321961	0.141301224	0.546187437	0.177568972	0.717163452	0.077400966	0.515425323	0.911916256	0.454721586	0.316118195	0.200933699	0.232472152	0.055682514	0.073086526	0.010062387	0.263281151	0.213870776	0.257750828	0.071690603	0.217171025	0.679073269	0.187841895	0.361827931	0.071648994	0.390872524	0.17733127	0.614408635	0.619125469	0.021117186	0.695472181	0.41195737
E07000061	2016	0.154678718	1.08458576	1.018392547	0.183242352	0.661890462	0.36322219	1.012181154	0.887433913	0.26253104	0.246480319	0.961390525	0.381080784	0.417114002	0.043446102	2.384954256	0.011198258	0.35915529	0.128478763	0.140262211	0.535014559	0.169932005	0.691847784	0.081715635	0.510612409	0.888116876	0.444461649	0.310219007	0.195645286	0.222272156	0.056495415	0.068907144	0.00965249	0.258127064	0.208370947	0.256283894	0.070330845	0.227527576	0.667351073	0.184543206	0.357249068	0.070756681	0.392385822	0.170086027	0.606124702	0.601390355	0.020308458	0.677276678	0.387493358
E07000062	2016	0.160535962	1.074457645	0.998741696	0.186809979	0.632324513	0.361998518	0.998613571	0.867734148	0.254738629	0.230349854	0.944730934	0.375627894	0.409693538	0.042007534	2.328175227	0.011298447	0.328834284	0.119173256	0.125909158	0.507416506	0.173092315	0.668710373	0.088596813	0.487610993	0.863315699	0.429882053	0.297756628	0.185035947	0.216399414	0.055247664	0.071368253	0.008829589	0.247851633	0.206013416	0.24641575	0.065980592	0.208280111	0.63982769	0.178001456	0.341919515	0.064308343	0.373046241	0.161825697	0.583635665	0.582309613	0.02020204	0.6659873	0.383739167
E07000063	2016	0.158274108	1.114810843	1.045303849	0.177391593	0.680049283	0.366300983	1.039266656	0.927139296	0.268556621	0.265260857	0.990292136	0.396380349	0.425527079	0.045877944	2.432476353	0.011137523	0.377910329	0.134410566	0.151194441	0.553488707	0.166958155	0.719268663	0.079836714	0.524197901	0.920924168	0.456001317	0.318730705	0.209152201	0.225911848	0.058290638	0.070081584	0.010024526	0.26284572	0.213478517	0.264647438	0.07231867	0.237800002	0.698393907	0.190844327	0.378056132	0.073941128	0.410897093	0.179299393	0.632833818	0.619675332	0.022124243	0.7002105	0.399086255
E07000064	2016	0.157799017	1.157349466	1.095874198	0.173611424	0.727886363	0.359821262	1.05882646	0.959643414	0.285668477	0.28560602	1.007015906	0.401220937	0.455660523	0.050006372	2.546417353	0.012130788	0.411062217	0.142457602	0.160992076	0.589417363	0.17040011	0.766401471	0.06879055	0.542721162	0.943795478	0.470688318	0.333640771	0.223948931	0.242273122	0.058652752	0.073670742	0.011283806	0.279528198	0.224275589	0.271690797	0.078804163	0.244723109	0.731309917	0.196938227	0.395789639	0.082560902	0.413364517	0.193011545	0.65720027	0.65053265	0.023328926	0.72110438	0.432125246
E07000065	2016	0.158539512	1.135606181	1.073588011	0.180078574	0.695270823	0.374856846	1.061696535	0.968063878	0.276901085	0.271558477	1.028998896	0.410930778	0.438129165	0.046506579	2.471196708	0.011648967	0.395532829	0.145099788	0.1601679	0.569721638	0.167070044	0.732557825	0.079653271	0.540398274	0.963092093	0.469455828	0.328092378	0.21687816	0.230317595	0.061355086	0.070964071	0.010551969	0.272197454	0.218831756	0.272723147	0.075391292	0.246763012	0.733933162	0.194215215	0.40231394	0.076454526	0.432140982	0.185971136	0.65988373	0.641791939	0.021671748	0.728382666	0.409187809
E07000066	2016	0.172280423	1.002172083	0.938176647	0.176045634	0.59598575	0.346667267	0.971338071	0.826349608	0.240147701	0.244743711	0.946923089	0.355865604	0.36323797	0.0421345	2.125274909	0.011674976	0.346693001	0.129617566	0.134980305	0.493549014	0.156498723	0.622550243	0.101086943	0.48316867	0.836880611	0.409682756	0.2933169	0.176910784	0.198409817	0.061418051	0.068385771	0.007860043	0.251258808	0.199107089	0.243518865	0.064249689	0.225528064	0.63455983	0.18449491	0.350791109	0.062750746	0.400521183	0.154817169	0.597413701	0.576583837	0.024250393	0.64122912	0.339069377
E07000067	2016	0.156661429	1.062087336	0.998225265	0.181250836	0.629360442	0.367297738	1.010614869	0.885370358	0.251087205	0.243008772	0.973148727	0.381484233	0.403279954	0.040747253	2.299143457	0.011360578	0.349171601	0.129147045	0.13896876	0.51274026	0.157537616	0.663817758	0.091289229	0.500772444	0.897147026	0.437182847	0.301705093	0.188442538	0.2102926	0.057654284	0.065493393	0.008528613	0.253600655	0.202811702	0.256160752	0.06656409	0.224330384	0.670372839	0.186029662	0.364128909	0.06565925	0.405838173	0.165647179	0.613371993	0.593424392	0.020764417	0.682884501	0.369397417
E07000068	2016	0.15703358	1.054524244	1.003032729	0.177121705	0.644740151	0.367278232	1.001993785	0.891921794	0.250416888	0.253985495	0.986591266	0.373982782	0.398561774	0.043268394	2.276988696	0.012676213	0.374304905	0.140295144	0.149707994	0.520591991	0.159477665	0.66769528	0.082114152	0.506699601	0.906515438	0.434839032	0.304725151	0.198284812	0.210841793	0.060259846	0.069073894	0.009564547	0.265419811	0.201036286	0.253547636	0.068261014	0.237491446	0.686305819	0.189441902	0.38732927	0.070282343	0.418750521	0.167656149	0.626476062	0.60696324	0.021489763	0.673162263	0.361872123
E07000069	2016	0.152044871	1.106022774	1.040100625	0.179114296	0.666272716	0.368887028	1.027912473	0.930079498	0.267570571	0.252125546	0.976203433	0.393564599	0.432093934	0.043475881	2.435315814	0.011878265	0.369145994	0.133687738	0.146074683	0.543673287	0.161400472	0.710151381	0.072591739	0.516250854	0.917032977	0.450227448	0.3110843	0.202243949	0.226054061	0.055021102	0.068023972	0.010024381	0.259680173	0.207797031	0.258465898	0.071736737	0.225998406	0.685650912	0.186700407	0.368206221	0.071269272	0.399849809	0.175809224	0.617745817	0.610650259	0.019195347	0.692562653	0.399279917
E07000070	2016	0.168284486	1.03545705	0.975394973	0.179589295	0.618691495	0.355126004	0.996632218	0.869139097	0.245242962	0.256927471	0.981262925	0.372027763	0.378645517	0.042695085	2.192811608	0.011613213	0.367521627	0.135668101	0.142224407	0.507693825	0.158691273	0.642751593	0.096844428	0.500136452	0.878951339	0.429017708	0.305338431	0.187457878	0.204432132	0.064581122	0.069274817	0.00826346	0.260288687	0.203979506	0.253464238	0.065523009	0.236310132	0.663676035	0.191795091	0.376813372	0.066020921	0.418609028	0.16456966	0.62409303	0.599315775	0.025455789	0.674716277	0.352131734
E07000071	2016	0.166128872	1.019367239	0.950267032	0.177831662	0.602417014	0.34929914	0.974633103	0.828958903	0.238647525	0.241688646	0.937645629	0.358665868	0.372903122	0.041118182	2.17597645	0.011861504	0.341746585	0.123858607	0.12934047	0.492758671	0.160388954	0.629902886	0.094325478	0.480133492	0.835490786	0.414708512	0.292742005	0.177143169	0.202287059	0.058670284	0.067718974	0.008024709	0.247716057	0.19781107	0.243798961	0.063701241	0.219187283	0.624375399	0.183780145	0.341727904	0.06242573	0.387314969	0.155833716	0.584359235	0.570145613	0.023334776	0.642910947	0.345665835
E07000072	2016	0.175374449	1.029911714	0.987151391	0.179411218	0.630639525	0.344765003	0.995809045	0.852218739	0.246912847	0.283358404	0.990198847	0.361524889	0.372742217	0.04449879	2.148852301	0.012288425	0.393506903	0.140905781	0.145538757	0.502199061	0.173898174	0.639455538	0.096300614	0.503905519	0.867108547	0.428231929	0.312376814	0.192588956	0.204697734	0.068355541	0.072016977	0.008712703	0.269728388	0.207706547	0.252797993	0.066723363	0.240454863	0.669400135	0.200774294	0.390166178	0.068130515	0.423739619	0.166294186	0.635896838	0.611940244	0.03238002	0.667520172	0.351702488
E07000073	2016	0.179220214	0.95950071	0.897158966	0.175029646	0.573771132	0.326118817	0.951552197	0.770584985	0.229964767	0.240994486	0.915365052	0.340535083	0.332914695	0.044626874	2.033788849	0.010602417	0.343289597	0.126674433	0.12779006	0.48671286	0.157020967	0.586904592	0.108921646	0.476133105	0.791444221	0.39830221	0.28384239	0.16543645	0.187543593	0.063023244	0.068925458	0.006693047	0.249023147	0.196497722	0.237459571	0.062619647	0.22270688	0.5996124	0.182350556	0.335153019	0.059653352	0.392228409	0.148528483	0.581081432	0.559964759	0.026963684	0.622175165	0.313471814
E07000074	2016	0.149937598	1.129473166	1.067958171	0.182090715	0.680606622	0.386018166	1.044692488	0.966274863	0.272947538	0.254474057	1.019536727	0.405960507	0.452039801	0.043356456	2.487875423	0.014026152	0.376685055	0.142848998	0.15598077	0.552171359	0.160750565	0.724068572	0.074568199	0.523586592	0.959548158	0.460720943	0.319309815	0.210006612	0.228870463	0.05679307	0.069179237	0.010332495	0.268404957	0.210229316	0.26685945	0.072200591	0.231475964	0.725884069	0.189533869	0.388060372	0.073366228	0.42047508	0.180506282	0.642296246	0.63414688	0.01721663	0.722584611	0.408616031
E07000075	2016	0.151643732	1.103688886	1.036560284	0.177494751	0.669299012	0.381391015	1.035662264	0.94746512	0.266949443	0.25111594	1.000578817	0.399295304	0.429988727	0.042917894	2.439640383	0.01173542	0.366159281	0.139717252	0.154927692	0.55444897	0.150561882	0.70910171	0.078539651	0.523986991	0.943049802	0.455831098	0.312237022	0.204781779	0.219475104	0.056709438	0.065128619	0.009713561	0.262505454	0.205330159	0.264557469	0.071614879	0.241656812	0.713664081	0.18907049	0.381908338	0.072766905	0.426268956	0.176932667	0.63924968	0.622584381	0.01788319	0.710742165	0.389018254
E07000076	2016	0.14845456	1.111850629	1.045025483	0.1698763	0.691969689	0.358518574	1.016841766	0.919267458	0.27615194	0.25789384	0.952803519	0.381746836	0.441589633	0.046190839	2.470697923	0.011962662	0.374956124	0.130872404	0.147917694	0.55781084	0.163065958	0.733162518	0.066099098	0.516859373	0.89686256	0.449286738	0.312257752	0.20809581	0.231369261	0.051797137	0.069121382	0.01068826	0.262508339	0.209038164	0.257939302	0.073939823	0.223521033	0.68136764	0.184068104	0.360604634	0.076116965	0.386065318	0.180478206	0.610154289	0.614593684	0.019031378	0.676500335	0.411613368
E07000077	2016	0.162943162	1.058700686	1.006988851	0.182260705	0.635537049	0.367893798	1.017583702	0.912458925	0.25559742	0.257953251	0.998149783	0.389231605	0.397637986	0.042167652	2.268157962	0.012366541	0.369499231	0.140734677	0.151472308	0.52304983	0.158634294	0.667026638	0.094973415	0.511663043	0.919077269	0.443396675	0.309135779	0.197157362	0.210805998	0.063261431	0.06773231	0.008895586	0.263889171	0.206109465	0.258967241	0.068573989	0.23866609	0.701957058	0.191303469	0.387083394	0.067379481	0.427962761	0.168714754	0.640803352	0.614898948	0.023128587	0.694576365	0.366741616
E07000078	2016	0.164108933	1.047883708	0.972859827	0.186624658	0.621819419	0.365539968	0.98877904	0.867872019	0.248056628	0.233432117	0.959950357	0.374330226	0.38986354	0.040329545	2.28616215	0.011537203	0.343580855	0.125896152	0.134203659	0.509987545	0.158809537	0.646048537	0.08568186	0.497620535	0.870939784	0.430743187	0.299307103	0.182443967	0.210043098	0.057029062	0.065174364	0.008267257	0.252438434	0.198617209	0.2461128	0.06469817	0.224607783	0.63691591	0.186819249	0.349503066	0.064527032	0.403016316	0.158972117	0.601354333	0.588844402	0.021037074	0.66743023	0.356003621
E07000079	2016	0.156850709	1.156373782	1.09024852	0.18818392	0.70142093	0.384334696	1.085095068	0.988297085	0.282942636	0.267789011	1.050101936	0.424191939	0.45031073	0.04560734	2.539889099	0.010751241	0.398263786	0.147931512	0.162690458	0.580466647	0.161307275	0.74642949	0.073990036	0.555932007	0.995181082	0.481885414	0.334145231	0.221431164	0.234880886	0.061874631	0.069347281	0.010592578	0.274501316	0.22253182	0.279995311	0.076736031	0.253189978	0.755529184	0.196026173	0.417438346	0.076901262	0.446055956	0.190401163	0.677303202	0.651472082	0.020439204	0.756966985	0.419688533
E07000080	2016	0.161192022	1.145591187	1.075441465	0.186902267	0.694454138	0.379960856	1.067947413	0.964232573	0.277098019	0.268468044	1.019858387	0.405394241	0.445875086	0.045164399	2.507379398	0.012656059	0.385827513	0.139729121	0.150853491	0.564826928	0.170924951	0.731625115	0.083482066	0.536014633	0.947909234	0.468961351	0.325261368	0.210045312	0.232388462	0.06027511	0.071386801	0.009940955	0.271470272	0.218422927	0.271113421	0.074520339	0.236428095	0.713214199	0.19465588	0.390341094	0.073777351	0.419054853	0.18360329	0.650229449	0.637948363	0.023021195	0.723757034	0.414966857
E07000081	2016	0.170044607	1.02405114	0.952863358	0.184903545	0.600937027	0.358456037	0.989443034	0.828407563	0.2460851	0.221100976	0.923362333	0.360991981	0.376438539	0.039360853	2.226076565	0.011189204	0.321952277	0.120037728	0.123679744	0.499439303	0.154022981	0.633571521	0.097389067	0.483303623	0.831449663	0.417094092	0.287300584	0.16926521	0.203900502	0.054333863	0.064721472	0.007213506	0.244826411	0.194191785	0.244230019	0.063211384	0.211190974	0.613860197	0.182329563	0.322377995	0.059356414	0.386311847	0.152246903	0.582629439	0.568450603	0.021490029	0.641755298	0.345920453
E07000082	2016	0.158569144	1.128710865	1.055552869	0.187138095	0.6754419	0.384577415	1.065519028	0.95875143	0.272825782	0.256174141	1.016670264	0.410795479	0.436177479	0.043457153	2.480415013	0.010913557	0.374646033	0.141216238	0.153924123	0.560584032	0.157947038	0.72113978	0.079364551	0.537153932	0.960439438	0.466461109	0.321657225	0.207314847	0.226359054	0.059155803	0.066182	0.009665435	0.265915376	0.212723125	0.273071101	0.07301184	0.242380152	0.720298823	0.193837356	0.385982022	0.071985512	0.43420151	0.180310579	0.655194142	0.629892253	0.020221543	0.732151584	0.40068166
E07000083	2016	0.170892882	1.092508234	1.028994956	0.18339431	0.66399546	0.364530175	1.041409762	0.908084445	0.26531394	0.266424323	0.995715433	0.383635082	0.412776792	0.045697381	2.375231054	0.012093288	0.382911659	0.140249685	0.145782766	0.545106735	0.165975454	0.696148528	0.086814456	0.530851134	0.905924895	0.450012617	0.316485624	0.200011615	0.222042465	0.060875617	0.070775498	0.009345742	0.269912895	0.212503125	0.263870061	0.072104119	0.23723981	0.684810166	0.195336512	0.379960163	0.071762943	0.419246494	0.173910176	0.635599227	0.621810505	0.024837315	0.693626105	0.383724914
E07000084	2016	0.169698452	1.041682153	0.982184136	0.183204395	0.617629452	0.367774584	1.011753581	0.872819463	0.244430543	0.248505421	1.002175038	0.37598839	0.381253848	0.041334008	2.227332759	0.011153005	0.365211832	0.142155807	0.146479699	0.514170756	0.152870661	0.641444195	0.103514564	0.511717489	0.905536369	0.434148202	0.304908357	0.185858383	0.200564053	0.063945452	0.066060123	0.007844916	0.264225211	0.2023867	0.259635496	0.065755893	0.242063261	0.678438015	0.193803106	0.381301619	0.065375802	0.438488784	0.163655246	0.640978497	0.606503887	0.02336877	0.696541363	0.348433878
E07000085	2016	0.163838394	1.11400656	1.051983749	0.184466295	0.674913759	0.377007776	1.048306883	0.939915605	0.268852728	0.265676048	1.008741908	0.397150024	0.427506371	0.043987953	2.420783888	0.013442642	0.379500625	0.140246204	0.151725176	0.543306028	0.166398286	0.70793467	0.085925664	0.527615599	0.934648118	0.459638722	0.318903656	0.205849021	0.224281067	0.059585759	0.07001402	0.009650437	0.269316067	0.212486861	0.264828451	0.071897173	0.236270501	0.709733773	0.196874959	0.38214241	0.071688678	0.419444395	0.175530241	0.643936515	0.629455468	0.022017165	0.707454677	0.394553676
E07000086	2016	0.161903247	1.068649326	0.998963164	0.18313943	0.631449059	0.373809937	1.026170198	0.897077708	0.255068117	0.243946458	0.991328732	0.389074556	0.398885091	0.04088687	2.331132989	0.010095322	0.352803397	0.134243437	0.144867327	0.528308998	0.14863989	0.672099939	0.088922347	0.513153646	0.915017133	0.441520326	0.30719646	0.191715485	0.209021983	0.059987236	0.0644305	0.008309237	0.254409541	0.20299568	0.263643233	0.067402829	0.237075861	0.683478684	0.187955349	0.369204333	0.066283992	0.430112511	0.168672952	0.633732502	0.604116276	0.021085471	0.701725526	0.366146658
E07000087	2016	0.15678878	1.122308333	1.04983588	0.183489544	0.676474425	0.387222818	1.054620093	0.9587436	0.273030614	0.250419906	1.012678095	0.406900492	0.439744338	0.043059725	2.488663985	0.012007492	0.369274497	0.140226212	0.155430025	0.561342809	0.15308543	0.720985084	0.076972856	0.532681781	0.95290587	0.462430838	0.318238526	0.205381829	0.225945205	0.056811666	0.065286185	0.009854285	0.26458793	0.207939343	0.268005228	0.072248755	0.239645795	0.716094294	0.191320729	0.376376254	0.072323842	0.430478931	0.177417878	0.647128777	0.629003527	0.017946482	0.717844142	0.396912859
E07000088	2016	0.149008158	1.081455893	1.010350489	0.182910321	0.639817365	0.380071599	1.012893699	0.890873347	0.25274953	0.22580585	0.950098884	0.382724051	0.42302527	0.039433753	2.413118107	0.011696147	0.326402909	0.121724215	0.133476994	0.520522642	0.160386828	0.68235105	0.084186901	0.500717423	0.890777799	0.438298975	0.298185286	0.186311095	0.217741	0.051498467	0.06483969	0.008596491	0.245412566	0.19946676	0.253982584	0.066479166	0.213214695	0.65094558	0.178407018	0.340409873	0.065281984	0.389062625	0.163233846	0.589974178	0.585793023	0.015607811	0.678828467	0.379641346
E07000089	2016	0.161096946	1.084249706	1.021459413	0.184014719	0.650280414	0.381317585	1.038352811	0.924995216	0.255635721	0.251755279	1.005438422	0.391859566	0.413151326	0.041279933	2.346010748	0.012660306	0.369872561	0.138785108	0.149483315	0.530698273	0.155968928	0.681998182	0.093365788	0.518293962	0.931809411	0.449580003	0.309257889	0.195606698	0.214151071	0.061065833	0.065495867	0.00904773	0.264350819	0.206017311	0.265658953	0.069554251	0.238813016	0.701707303	0.192503415	0.382247538	0.067611451	0.430206974	0.170625324	0.639078934	0.616199094	0.021336746	0.700780157	0.372971533
E07000090	2016	0.159899417	1.083951466	1.014431863	0.17750869	0.664459851	0.361630129	1.023085968	0.892861064	0.264984134	0.245913164	0.962882826	0.380840639	0.422179372	0.043060536	2.385125772	0.01235416	0.364092019	0.135332203	0.144169504	0.541246171	0.154636981	0.695582312	0.077310959	0.510841341	0.892077578	0.44113892	0.307901512	0.19608489	0.220523941	0.055582884	0.067806945	0.009359004	0.260702222	0.204681983	0.258432016	0.070940645	0.229109638	0.674134531	0.186134492	0.357339411	0.070523224	0.404534389	0.171917975	0.621452872	0.608833374	0.021279458	0.681817697	0.385857013
E07000091	2016	0.156660018	1.141133598	1.073307347	0.179505924	0.708716747	0.371499862	1.061651883	0.956651515	0.279865221	0.263835983	1.015430744	0.405984415	0.448877492	0.046491974	2.515801825	0.012412424	0.396841171	0.142865332	0.159288882	0.577673024	0.161869096	0.744087787	0.076698806	0.541084338	0.953387913	0.468364636	0.328018372	0.216695013	0.234533262	0.05912684	0.071417118	0.010568337	0.274390445	0.217264703	0.272003041	0.076538855	0.244146673	0.727017528	0.191541643	0.393270776	0.078286269	0.423762842	0.186977336	0.654760948	0.641001242	0.020577526	0.724213776	0.416614679
E07000092	2016	0.165938548	1.016699424	0.948980426	0.186968696	0.587239852	0.372800415	0.992200509	0.844128792	0.240910079	0.217350224	0.953439036	0.36813595	0.370404959	0.036467977	2.204901725	0.010635497	0.320040974	0.125501315	0.130360874	0.493966771	0.148778028	0.619048371	0.105344095	0.486803042	0.865163601	0.42263765	0.286680689	0.170003754	0.194287932	0.057761034	0.061782367	0.007175125	0.244799376	0.190067503	0.248115645	0.061260415	0.222477601	0.637738553	0.184672587	0.338988834	0.058553585	0.411166737	0.152478045	0.602932821	0.577438039	0.020230316	0.664818309	0.333586776
E07000093	2016	0.160599742	1.104988781	1.037899068	0.183359339	0.65683168	0.380320423	1.040622885	0.937222693	0.265087258	0.260232179	1.016210474	0.399632241	0.423362446	0.042631476	2.40315922	0.011966921	0.371531856	0.139332279	0.150772517	0.543363182	0.164162133	0.699980458	0.086752723	0.523762521	0.938121123	0.455287027	0.316866697	0.202495972	0.220633207	0.06047156	0.068787692	0.009573531	0.262268707	0.209905684	0.264680344	0.070564928	0.23770592	0.704172328	0.191981548	0.385202733	0.069737428	0.426192643	0.175357165	0.637404266	0.622802159	0.02113716	0.715244135	0.387884633
E07000094	2016	0.160763555	1.082827626	1.016713007	0.182822925	0.655577506	0.374755224	1.026645396	0.923818057	0.261037032	0.254963333	1.01122506	0.392487495	0.416823161	0.04373283	2.343194463	0.012531067	0.380528064	0.141591332	0.15583257	0.537943958	0.160196126	0.682491013	0.089615515	0.522485469	0.933756523	0.449587627	0.315652327	0.202946507	0.21565714	0.061535477	0.068798415	0.009652494	0.26538469	0.207147831	0.260809226	0.069616454	0.243869352	0.714070445	0.192140917	0.388149163	0.070843321	0.429821113	0.172482532	0.644086012	0.621744889	0.02072765	0.706759036	0.378163691
E07000095	2016	0.164459201	1.032239044	0.959853163	0.181050855	0.609802792	0.360870424	0.992306354	0.867451291	0.245421353	0.23883743	0.956521664	0.373119763	0.383251632	0.041950936	2.218746932	0.011982812	0.342977308	0.130727012	0.139185177	0.507848077	0.159409457	0.641074971	0.102653146	0.49571848	0.872234331	0.42618058	0.296978113	0.182195057	0.204218643	0.059462561	0.06798908	0.008554916	0.253874703	0.201093533	0.248931757	0.06622523	0.228812806	0.655175397	0.182950941	0.352666922	0.063836405	0.404794044	0.156878375	0.604334486	0.586091957	0.01976313	0.655419234	0.349463534
E07000096	2016	0.155948865	1.042775823	0.975361948	0.180305426	0.619807664	0.373001662	1.000719432	0.88232977	0.243954097	0.232607526	0.972654732	0.380082113	0.39176375	0.04070997	2.267439254	0.01123968	0.34346743	0.132651034	0.144353011	0.513893605	0.152960555	0.648170421	0.098380154	0.505108976	0.904146346	0.434716838	0.298159582	0.186852385	0.203555891	0.057525581	0.063107456	0.008540846	0.251423154	0.197813562	0.254273016	0.065911464	0.234437662	0.673518334	0.183534629	0.362962159	0.065335986	0.418214543	0.161410597	0.614636891	0.591582417	0.018010517	0.682163586	0.354069408
E07000098	2016	0.174737828	0.993626927	0.955347207	0.178467099	0.601988444	0.340434163	0.979126351	0.816125791	0.237974286	0.263281016	0.95666352	0.350972144	0.353406443	0.042100288	2.086328948	0.011547242	0.368892345	0.132234602	0.138134696	0.484790753	0.163913974	0.61471365	0.108079434	0.491580393	0.836042869	0.416373249	0.300718044	0.179947451	0.195214779	0.066880521	0.069982427	0.007515276	0.260185597	0.201631091	0.248012294	0.063374292	0.236002713	0.649600407	0.194064128	0.365550679	0.063544217	0.413700999	0.159518975	0.621927073	0.591540769	0.029645654	0.651463742	0.335007416
E07000099	2016	0.170694744	1.037139295	0.97397823	0.179624022	0.621989495	0.358872688	0.999547488	0.864321792	0.240787734	0.254066235	0.982294277	0.370411591	0.379102821	0.045138585	2.201099531	0.012864305	0.359893647	0.135761766	0.144874267	0.515036088	0.159642349	0.645500609	0.103786999	0.505123954	0.880336376	0.42688562	0.303220394	0.185270002	0.205056523	0.064625682	0.0683319	0.00839611	0.262668963	0.206290572	0.254601723	0.067283434	0.242134133	0.673138235	0.18849324	0.375709901	0.066155233	0.418001769	0.162797028	0.625236712	0.598484053	0.023927288	0.672017097	0.349003078
E07000102	2016	0.182500789	1.01555911	0.970608417	0.17966671	0.617064796	0.341656657	0.992000074	0.820306234	0.236168283	0.283102549	0.969344914	0.348779898	0.354731831	0.045040231	2.091800958	0.01325322	0.383144354	0.138122499	0.139033844	0.492753051	0.174447252	0.62411565	0.110452264	0.498977014	0.839488331	0.421788365	0.30571164	0.182875586	0.2010717	0.069706433	0.074743054	0.007753373	0.26941037	0.208849829	0.250344663	0.065265266	0.240224852	0.647163126	0.201048313	0.378937812	0.066059205	0.413079615	0.159941569	0.625349635	0.59794756	0.033060385	0.648711707	0.336850611
E07000103	2016	0.186194362	0.913058397	0.869276421	0.175527975	0.539141852	0.319401693	0.919597016	0.716176607	0.210988502	0.25548561	0.920746205	0.310104973	0.297938277	0.038839611	1.832438369	0.011243038	0.37063226	0.132189197	0.12146806	0.433333192	0.164664115	0.537383397	0.121402678	0.454906346	0.751228371	0.379357703	0.282606584	0.155989976	0.17364636	0.07244111	0.071366333	0.006014986	0.25813176	0.190442501	0.226592613	0.055410189	0.223605249	0.575114147	0.190233136	0.346309398	0.056582378	0.397912417	0.141881205	0.592132459	0.556266515	0.035262717	0.590646437	0.284216675
E07000105	2016	0.164819389	1.050949654	0.991624639	0.181622715	0.62162908	0.361778354	1.010170638	0.875465448	0.253786178	0.252178187	0.970402551	0.375205455	0.389686707	0.041582202	2.257587416	0.010739141	0.355267893	0.130723735	0.13911802	0.5121027	0.162554166	0.658664691	0.094190317	0.503297909	0.888238313	0.435291753	0.304056572	0.1886642	0.208979058	0.059395304	0.067629371	0.008491721	0.254357641	0.204090948	0.25527925	0.066939873	0.227590855	0.665816367	0.18883809	0.360502501	0.065523912	0.408381206	0.164681739	0.614493841	0.593943516	0.022674594	0.677998827	0.366243769
E07000106	2016	0.16500063	1.054033299	0.990891616	0.18097104	0.637173424	0.34338576	0.988681215	0.859612382	0.250069243	0.266323416	0.960932093	0.368589642	0.392016925	0.043390143	2.233355743	0.012167629	0.372199259	0.128811506	0.137041695	0.505489224	0.175758889	0.658982678	0.088811828	0.493242832	0.860092855	0.43205742	0.310180105	0.193647287	0.216385603	0.060758957	0.072819952	0.009185482	0.258502082	0.209070075	0.246638527	0.067479969	0.226468327	0.652118018	0.190674801	0.365313696	0.067215956	0.390704731	0.165231901	0.602025951	0.594377524	0.025663504	0.659946917	0.369100368
E07000107	2016	0.167624062	1.00233188	0.927743191	0.177853686	0.577228166	0.358155276	0.973927673	0.82586765	0.230655988	0.236428529	0.948874988	0.358153208	0.356500622	0.040250579	2.146179863	0.012048707	0.330882909	0.127563023	0.133545988	0.491785515	0.154541895	0.614675542	0.103369006	0.486960786	0.850146262	0.410627897	0.290700495	0.173713999	0.194615969	0.058325038	0.064320854	0.007539093	0.246130956	0.194030134	0.243720107	0.061475155	0.225942817	0.62406108	0.183797414	0.342666462	0.061581429	0.40608214	0.149112544	0.589009613	0.567548827	0.019367498	0.649185654	0.327532809
E07000108	2016	0.15783218	1.100967397	1.030941291	0.180779024	0.658401346	0.374320038	1.029458109	0.917891336	0.268702196	0.247384337	0.974500109	0.390542921	0.428678639	0.042598896	2.435970115	0.011330221	0.354575923	0.13244636	0.143305594	0.540265985	0.158682332	0.709854712	0.07711946	0.518260197	0.914183758	0.447607031	0.31046017	0.197954494	0.222627794	0.053667301	0.066980832	0.00929441	0.257476307	0.206526526	0.262864621	0.070753204	0.224863831	0.680699442	0.18538322	0.360988045	0.06973321	0.4082704	0.172835009	0.621224825	0.611837904	0.018709613	0.699418219	0.395718142
E07000109	2016	0.197372166	0.992189591	0.921301311	0.175417982	0.586854782	0.321684529	0.956387007	0.778337851	0.232719058	0.279208665	0.920350268	0.326672902	0.336706483	0.045823407	2.003539906	0.013818635	0.357224131	0.124274575	0.123768424	0.476094789	0.185293858	0.615396315	0.126168545	0.468672766	0.769746953	0.398598293	0.297396989	0.173196303	0.198367016	0.068457527	0.081341845	0.007524762	0.256335332	0.208575757	0.235611352	0.063335223	0.216548536	0.596021126	0.191709913	0.349256355	0.061059162	0.372883145	0.147406052	0.581940913	0.574441964	0.034682004	0.597876612	0.329517432
E07000110	2016	0.165418451	1.052842191	0.98345368	0.181290858	0.6234794	0.363551509	1.006922936	0.876865846	0.253367689	0.248105318	0.970399076	0.376525004	0.393452133	0.041006829	2.262272607	0.011441883	0.356696806	0.130256264	0.139040208	0.510027082	0.158218776	0.660105045	0.091116194	0.498360534	0.881077019	0.430630445	0.303376416	0.187673103	0.209686857	0.059434192	0.067570837	0.008471791	0.255564917	0.201787308	0.252932954	0.066502165	0.226009214	0.659005882	0.187275531	0.359604733	0.065443305	0.408207766	0.163930673	0.61370356	0.595088338	0.022845636	0.671851959	0.36329466
E07000111	2016	0.152483932	1.098640803	1.034173592	0.183357031	0.657360622	0.379040288	1.032035855	0.922768034	0.261875624	0.246745051	0.981851322	0.391929458	0.426516237	0.041736508	2.407956499	0.012744192	0.357291151	0.129089937	0.144014656	0.528865362	0.169438356	0.696049388	0.088206878	0.512825015	0.919060998	0.450456062	0.308441538	0.197780595	0.221744041	0.056061291	0.067065878	0.009653756	0.257276919	0.207333366	0.259132715	0.069481167	0.225751548	0.686171938	0.187224179	0.367294497	0.068594147	0.402066569	0.170934142	0.614163602	0.607822617	0.018863342	0.687965357	0.389533278
E07000112	2016	0.159775475	1.083310979	1.021294243	0.180014021	0.653941488	0.364329909	1.023177554	0.893089466	0.260499963	0.253000882	0.980119658	0.381404301	0.411635091	0.043860113	2.386400213	0.010314718	0.362995673	0.137011259	0.144092836	0.543782334	0.156246757	0.697127518	0.074524526	0.518235874	0.906268001	0.439841741	0.310642258	0.198588234	0.216927976	0.058096397	0.067394722	0.009101545	0.259665586	0.206447842	0.265311663	0.071227686	0.235115595	0.680671224	0.186544769	0.366358623	0.070881388	0.415639707	0.176772389	0.630041307	0.608191361	0.022151007	0.701595279	0.384468537
E07000113	2016	0.154180699	1.067276093	0.994594183	0.180857192	0.627563718	0.36987925	1.011979174	0.877982289	0.253725085	0.232469243	0.960638472	0.379864741	0.408303862	0.039460098	2.341020714	0.01094423	0.339083418	0.126396863	0.136240575	0.519442764	0.156656914	0.671588502	0.088900222	0.498257145	0.891897956	0.434029094	0.298494991	0.187506311	0.211343074	0.053652749	0.065690576	0.008496949	0.247265155	0.19857056	0.253951691	0.065911773	0.218353904	0.656041919	0.180044197	0.349460888	0.06508675	0.397955274	0.163638342	0.59806685	0.585241715	0.017844104	0.679553226	0.373012164
E07000114	2016	0.164493092	1.074249555	1.013583576	0.180735798	0.652555911	0.350754354	1.012057901	0.878087692	0.261494861	0.265200805	0.96626789	0.373466871	0.406204982	0.045232876	2.310503089	0.011203794	0.370327294	0.12817565	0.137170759	0.528033165	0.17773444	0.684603465	0.088691897	0.506149314	0.871753789	0.437430229	0.30993561	0.194706823	0.219785193	0.059502399	0.073292302	0.009191875	0.258049616	0.212661346	0.25488849	0.069093119	0.22461124	0.656732981	0.185432159	0.36591766	0.068986127	0.39090692	0.171370696	0.607500633	0.604160246	0.026955911	0.668850234	0.386177669
E07000115	2016	0.160569128	1.059540205	1.001921743	0.181532343	0.637342633	0.373528123	1.018876771	0.89619726	0.251760172	0.246825909	0.984086979	0.379970387	0.40008878	0.041614762	2.29131281	0.011740116	0.362582167	0.137151199	0.147410241	0.522262307	0.153485493	0.668196055	0.091391813	0.511945732	0.908670419	0.437883785	0.303399493	0.192721888	0.208741479	0.059402088	0.065952117	0.008861164	0.261997788	0.201720602	0.259657323	0.068030434	0.235412144	0.686015444	0.189073938	0.374282104	0.067891613	0.423186133	0.166954954	0.629146503	0.606331212	0.020751473	0.685028665	0.363660975
E07000116	2016	0.15918722	1.052023007	0.99123614	0.18238105	0.623009356	0.36901353	1.009810317	0.896478424	0.250552066	0.244449172	0.99050494	0.389369767	0.386443239	0.041009679	2.257531677	0.010062673	0.355560112	0.133822401	0.147250562	0.51680601	0.153683154	0.656030528	0.087787153	0.507472882	0.916698494	0.438598809	0.304713006	0.194245787	0.205176584	0.061556102	0.064275849	0.008719063	0.254460296	0.201528149	0.257292779	0.06663959	0.240332762	0.68881671	0.188338177	0.381339832	0.06659759	0.427288049	0.167572544	0.635371453	0.600039271	0.021584664	0.697956285	0.359774106
E07000117	2016	0.149867761	1.001407931	0.938296206	0.178156766	0.590511789	0.349802864	0.956977276	0.826516096	0.243179684	0.215192593	0.913203814	0.363655921	0.379482486	0.037526143	2.190104122	0.009181808	0.316367097	0.119620447	0.12652632	0.487088228	0.144898645	0.628978874	0.08105063	0.471853107	0.847201067	0.408530006	0.282984523	0.175592984	0.197426144	0.052722835	0.061132894	0.00815769	0.234682013	0.188491796	0.242880799	0.062627691	0.209432562	0.620901763	0.172495956	0.331785023	0.060762554	0.384827464	0.157086555	0.579922784	0.558369133	0.019888095	0.651205646	0.351967322
E07000118	2016	0.15516428	1.064045404	0.986277095	0.179588408	0.618668498	0.367973836	1.002332451	0.883405366	0.250620231	0.232240639	0.953447585	0.379648186	0.406846116	0.040784517	2.328184085	0.01206631	0.334037912	0.125296623	0.134674564	0.513955669	0.153281208	0.670191846	0.081963908	0.493169155	0.884237993	0.427058767	0.296198807	0.185422172	0.211819217	0.054786785	0.065050913	0.008837755	0.24745324	0.200162027	0.251496863	0.066849788	0.215481992	0.655772239	0.179769804	0.347824789	0.064253178	0.392569133	0.162454981	0.593519304	0.581793927	0.017496981	0.67409798	0.372094347
E07000119	2016	0.151563282	1.111019478	1.045112704	0.177487945	0.684557744	0.363513083	1.023510094	0.916904716	0.267418104	0.25458065	0.970985097	0.388135447	0.435736878	0.045233065	2.462152392	0.01185824	0.373341995	0.133484599	0.146608494	0.553318876	0.162709453	0.720854502	0.068571237	0.522141415	0.909064393	0.449246072	0.313929983	0.20599896	0.22958367	0.05519681	0.067974795	0.010200285	0.263692935	0.210021921	0.261198803	0.073040907	0.227946005	0.686475676	0.187134433	0.370494348	0.074627621	0.39583754	0.178004361	0.617341518	0.612792821	0.019664453	0.690353229	0.403663767
E07000120	2016	0.160334924	0.998519456	0.936067104	0.178406709	0.589106661	0.34302472	0.955998829	0.806010205	0.241221512	0.227678835	0.896923998	0.348959492	0.369617581	0.038378734	2.153525543	0.010317029	0.321903421	0.115837374	0.119642923	0.482960149	0.162029481	0.619450348	0.087601667	0.466471543	0.80736634	0.404695364	0.2814017	0.168991416	0.198128929	0.054049516	0.067067927	0.007575287	0.236129708	0.191894071	0.238835807	0.062351397	0.203769829	0.598862286	0.174394605	0.322675091	0.058513531	0.366421943	0.153585843	0.564596856	0.554567978	0.024976328	0.626890519	0.345979992
E07000121	2016	0.15782468	1.03777448	0.96559365	0.179317529	0.625445652	0.349391429	0.978896111	0.852218451	0.24848582	0.233327753	0.930519217	0.369296481	0.391716785	0.040966149	2.258255874	0.011291156	0.343109939	0.126056618	0.135539945	0.510862445	0.153491342	0.652445614	0.080824801	0.490308959	0.85147037	0.422874779	0.294707315	0.182414368	0.208462601	0.05578781	0.065288469	0.008549201	0.250985655	0.198287912	0.248678673	0.066378081	0.220335945	0.636991273	0.180511395	0.341726134	0.065290062	0.389403273	0.160838476	0.590166946	0.57814087	0.020311248	0.649301339	0.360839144
E07000122	2016	0.164819193	0.976306287	0.91441669	0.172030425	0.578681414	0.328374848	0.938363836	0.782616266	0.233432725	0.239787612	0.898356121	0.339440621	0.35343542	0.039281961	2.073820735	0.010658692	0.334860338	0.118735173	0.121310631	0.473582945	0.164579126	0.605984679	0.098963874	0.460365408	0.791060853	0.397924355	0.283211862	0.167978994	0.193881079	0.058459832	0.068359022	0.00753478	0.238714172	0.192772745	0.237748162	0.062027792	0.208113763	0.590711184	0.175866743	0.330106728	0.059104212	0.370478351	0.152059504	0.565527097	0.552994177	0.028046286	0.620486854	0.334404401
E07000123	2016	0.186712101	0.914784121	0.872494624	0.175059439	0.553050106	0.298444981	0.901503238	0.696958775	0.218925947	0.281930719	0.870090548	0.298310336	0.305236481	0.039485987	1.851187789	0.010600695	0.35973105	0.117562217	0.10768761	0.430254376	0.18574467	0.545209857	0.113448527	0.444364878	0.708792343	0.378685083	0.281070676	0.159537469	0.181008367	0.065682048	0.072369535	0.006264737	0.245430758	0.19335093	0.223510172	0.057010452	0.21359386	0.546238941	0.195366677	0.329581389	0.054060998	0.359499162	0.141891391	0.560926095	0.540537385	0.045257942	0.569260744	0.299025866
E07000124	2016	0.156627709	1.099100988	1.042135761	0.179946075	0.666272615	0.369378136	1.033482025	0.925982363	0.268332368	0.255808654	0.990082252	0.394480009	0.421337873	0.043133127	2.398847172	0.011197026	0.373314922	0.138009424	0.148794155	0.541889486	0.158046128	0.700840447	0.074658399	0.520259275	0.925209031	0.45156034	0.3123279	0.202732262	0.222545298	0.056929988	0.06713581	0.009840177	0.265846653	0.20901669	0.264916962	0.071458444	0.227530287	0.69800741	0.191719184	0.380040407	0.071079725	0.411674147	0.17501571	0.630790924	0.613879503	0.020122922	0.69305873	0.390351713
E07000125	2016	0.148189618	1.049612276	0.983966579	0.186232352	0.609974069	0.367639743	0.988766003	0.867463845	0.252573901	0.22911885	0.938028523	0.375945114	0.402359007	0.037305487	2.281618678	0.010496185	0.326875154	0.117815487	0.12529241	0.491459704	0.163500687	0.651812189	0.086884188	0.48174256	0.869144105	0.42540121	0.288999801	0.178719427	0.20846721	0.051781569	0.065437234	0.008365207	0.241376396	0.200332459	0.248455184	0.064910916	0.202778918	0.637854203	0.173579245	0.345710141	0.061281309	0.373933701	0.160506557	0.573837165	0.571785192	0.01864514	0.656514928	0.370520124
E07000126	2016	0.159624715	1.052923095	0.982293637	0.179910645	0.62505009	0.365663898	1.004306719	0.870452183	0.251798366	0.228627113	0.93931117	0.372549852	0.400296186	0.039482117	2.332938406	0.009988818	0.330790541	0.12691969	0.135695829	0.52412817	0.140570088	0.670938822	0.076613596	0.504201001	0.880507575	0.428304106	0.295343988	0.182843445	0.208690133	0.053426115	0.060900211	0.007835342	0.248696256	0.194164892	0.258819828	0.067505892	0.224597003	0.655052206	0.181911235	0.339925838	0.064918387	0.409219875	0.163777754	0.610656352	0.589892084	0.0193068	0.677403149	0.366540331
E07000127	2016	0.150090737	1.069366655	1.002412489	0.178587337	0.634732347	0.36365589	1.00646177	0.901609653	0.259197611	0.238452232	0.960302986	0.386417267	0.410878876	0.040266523	2.331338384	0.010644597	0.35007841	0.128694265	0.139727281	0.519160795	0.152944119	0.680163665	0.070591571	0.501321372	0.898500453	0.435135751	0.300050278	0.193613883	0.214745058	0.053927682	0.066010108	0.009447496	0.250533247	0.20168789	0.253462787	0.068470032	0.217920064	0.66822729	0.180636906	0.361678288	0.066908498	0.398837608	0.168157277	0.602500908	0.591291146	0.017991331	0.678736892	0.38117507
E07000128	2016	0.152553045	1.106224844	1.028727792	0.176054661	0.677689802	0.361119443	1.020562189	0.923666832	0.272704104	0.250303749	0.959374691	0.390349472	0.430995911	0.043769051	2.447063181	0.011497949	0.372025134	0.130105895	0.146168726	0.549050823	0.161950392	0.717980564	0.075901777	0.51518331	0.897694206	0.4487725	0.311463246	0.204779471	0.228212153	0.05555274	0.07123303	0.010247491	0.258541133	0.208297808	0.255149537	0.071224792	0.222480776	0.670917902	0.182031628	0.362835845	0.073349672	0.389112118	0.175765356	0.606119507	0.607003378	0.018463241	0.677687979	0.402085141
E07000129	2016	0.173202297	1.050633583	0.993090155	0.181866942	0.634625425	0.356189808	1.018725108	0.878233428	0.252725689	0.259986762	0.983662732	0.375712703	0.387662399	0.043433285	2.253939043	0.011316469	0.373867901	0.139663175	0.144361239	0.524828009	0.157317195	0.660432255	0.097731112	0.51374759	0.887206544	0.43743399	0.309476529	0.190138662	0.209007034	0.064740632	0.069262579	0.008112892	0.265681741	0.207877079	0.262245861	0.069151935	0.240560517	0.67674525	0.193870601	0.376743747	0.06697501	0.42554714	0.168377885	0.64007057	0.610604798	0.026995952	0.686948718	0.361735587
E07000130	2016	0.164885179	1.026283387	0.957209019	0.178161347	0.610311881	0.347483192	0.975305752	0.837341029	0.243927888	0.244773068	0.932387296	0.358868766	0.380023345	0.040369121	2.195850676	0.011955903	0.347896037	0.123869893	0.129711259	0.492437962	0.161981578	0.637867775	0.08945381	0.479569472	0.834684512	0.417440821	0.294399262	0.179582585	0.206395394	0.057807235	0.068204894	0.008155066	0.248899829	0.198178987	0.242165662	0.064261174	0.215278669	0.623505086	0.18516095	0.343677448	0.062744799	0.3840887	0.158070322	0.587903323	0.575130572	0.024424687	0.641288396	0.352724603
E07000131	2016	0.158324835	1.092177873	1.025083216	0.181996036	0.654335577	0.379268255	1.039986459	0.913791849	0.260173723	0.240989088	0.979915435	0.390801966	0.423660641	0.041131078	2.411233176	0.011606277	0.357929129	0.132295709	0.14735197	0.538686224	0.148435981	0.699566905	0.086100001	0.516043919	0.924940725	0.448614129	0.307847011	0.194161496	0.219101734	0.055987513	0.064812383	0.008874972	0.260785588	0.202810295	0.266190789	0.069512888	0.230833166	0.693635677	0.189419171	0.362228824	0.06852722	0.414664413	0.170529411	0.629166562	0.60955427	0.016999613	0.701899538	0.383500531
E07000132	2016	0.162609222	1.070142711	1.006815846	0.180358281	0.638798667	0.360499909	1.0181931	0.896487295	0.259067174	0.253147245	0.987704756	0.386585325	0.404050951	0.042992809	2.324912068	0.010398734	0.366144853	0.137186926	0.143769563	0.532183701	0.151501332	0.678586732	0.080195991	0.512473345	0.906427432	0.440297294	0.309366195	0.195758556	0.21270056	0.059166671	0.066913442	0.008890921	0.259010416	0.205656125	0.260938014	0.069292001	0.234338304	0.681197707	0.191339264	0.373204887	0.068311505	0.42157111	0.170679995	0.633194355	0.606291898	0.023344653	0.7008919	0.375224466
E07000133	2016	0.152678046	1.09534891	1.023440852	0.180672274	0.649321225	0.370003452	1.02628724	0.915689449	0.263440519	0.233564025	0.967140239	0.394470111	0.419659622	0.039581748	2.404488968	0.010287392	0.348169816	0.12604506	0.138479266	0.534969452	0.154847369	0.693707322	0.079951659	0.50413459	0.909079518	0.443365433	0.30400788	0.194064349	0.220970013	0.056004277	0.067853375	0.009115409	0.253525308	0.203715255	0.255869663	0.068073573	0.217770236	0.669719947	0.181381562	0.364349688	0.06702735	0.395179439	0.172792217	0.610340751	0.598861596	0.018608046	0.694405234	0.388520424
E07000134	2016	0.15856175	1.074937306	1.000525819	0.181282221	0.638550863	0.370437228	1.013606447	0.878866694	0.255413817	0.235821489	0.951504847	0.379058693	0.410601813	0.040743269	2.361077892	0.012099768	0.341512817	0.125212098	0.133583313	0.521611917	0.157797661	0.679375521	0.084857856	0.501875363	0.879737113	0.433202183	0.29949749	0.184777789	0.215374032	0.056553646	0.067209626	0.008506098	0.254454069	0.202262695	0.256329505	0.068452435	0.216435256	0.654565617	0.182736293	0.346427289	0.065540527	0.392186074	0.164743126	0.597740975	0.589207493	0.019171819	0.672446105	0.375991147
E07000135	2016	0.197375575	1.015630644	0.973114885	0.177076587	0.626789837	0.326880222	0.993521562	0.811383535	0.249796888	0.283916085	0.930802227	0.339755756	0.352480086	0.047552231	2.106677359	0.012053966	0.393166766	0.135298003	0.132500685	0.505087407	0.173578163	0.634218385	0.105751671	0.500172914	0.806169497	0.420340744	0.302521606	0.180076998	0.206240934	0.065253814	0.078299914	0.007423082	0.27295681	0.211076513	0.247348119	0.067926404	0.234149048	0.619300598	0.201410416	0.359405693	0.065459387	0.395222534	0.161270397	0.621707635	0.600581317	0.037099028	0.632915329	0.344609737
E07000136	2016	0.147291818	1.053555343	0.977572483	0.1830453	0.631857988	0.360057621	0.98761526	0.874605773	0.260202929	0.225541724	0.912868108	0.377315092	0.406206009	0.039159197	2.337269988	0.010824122	0.327965344	0.118446597	0.126992411	0.51529838	0.164264977	0.667205154	0.077417039	0.4881859	0.85162717	0.428530735	0.289440988	0.18484061	0.212600035	0.049692457	0.066689482	0.009160102	0.241341266	0.196753012	0.242842339	0.066640764	0.204536482	0.626152167	0.175793441	0.330964733	0.064001137	0.368539397	0.161565949	0.570804732	0.572193656	0.01907035	0.642274489	0.376034804
E07000137	2016	0.156571276	1.128567585	1.05779066	0.176238862	0.692245643	0.359585989	1.035425005	0.958263517	0.284408328	0.272268768	0.990926362	0.399084039	0.443199441	0.046440556	2.481223726	0.011512784	0.39319695	0.138009816	0.150444736	0.562394878	0.163273898	0.740744484	0.065813042	0.530897975	0.926577879	0.456664153	0.322566656	0.214732542	0.233483921	0.056937665	0.072412758	0.010734678	0.267881107	0.215999204	0.263647286	0.075825573	0.23072916	0.703345028	0.189789092	0.380391455	0.075776623	0.404093101	0.185891957	0.637301373	0.632462438	0.02179802	0.704605492	0.422662267
E07000138	2016	0.150795543	1.004520382	0.925174425	0.184347058	0.588075049	0.352874996	0.939052038	0.810817461	0.237289659	0.204378981	0.876203535	0.354909452	0.374345603	0.035364562	2.201074271	0.010324806	0.29742573	0.105406719	0.111853974	0.468990463	0.163550047	0.611302677	0.083837352	0.453819175	0.799093603	0.406932832	0.273704747	0.166382804	0.201067034	0.048293844	0.064795186	0.00756223	0.22809837	0.187137502	0.226009485	0.058599979	0.195410153	0.573535793	0.168977068	0.306005967	0.057234293	0.34991752	0.144605398	0.534801865	0.536845515	0.018997757	0.608803102	0.344543447
E07000139	2016	0.155621464	1.097374592	1.032431811	0.18092776	0.663809441	0.372571002	1.031566108	0.918199669	0.268628734	0.246281682	0.97431812	0.389296534	0.426845891	0.042774138	2.423515557	0.012203289	0.363021555	0.132659607	0.143372345	0.541023291	0.156780339	0.706573355	0.072270184	0.516416633	0.908507019	0.44449554	0.307152339	0.198791251	0.224339644	0.053940263	0.067658708	0.009756443	0.26075137	0.205136972	0.25949073	0.071336412	0.22203041	0.679897797	0.188875665	0.363143882	0.070577681	0.403023326	0.172333957	0.61577633	0.608317891	0.019040678	0.682105943	0.391652399
E07000140	2016	0.150744422	1.08710471	1.013656638	0.180209214	0.654191875	0.367527512	1.011769921	0.917597143	0.271216832	0.237030214	0.949480774	0.389945486	0.426643175	0.041229421	2.424374164	0.011735866	0.35302277	0.12779063	0.139604944	0.537368703	0.159026668	0.701138336	0.069366957	0.509940164	0.896751937	0.44338352	0.303033031	0.195198104	0.224056516	0.050633337	0.066242557	0.010022176	0.252820851	0.202694003	0.251940599	0.071173709	0.216245081	0.663663873	0.181845275	0.34809124	0.069121914	0.39031915	0.169875704	0.598660305	0.597375891	0.017075929	0.673993429	0.393620198
E07000141	2016	0.158755318	1.097280961	1.0270993	0.183396121	0.657897145	0.368024218	1.029727504	0.898153178	0.263359998	0.245054576	0.957685663	0.38310563	0.425478593	0.041574002	2.410690646	0.011855502	0.353262885	0.125009911	0.13483117	0.530887723	0.16332499	0.696447148	0.080531741	0.506485836	0.885041897	0.442775967	0.304112928	0.192187524	0.222322036	0.053685499	0.068368443	0.008884348	0.25530589	0.206459956	0.255982167	0.069285411	0.216504346	0.663740271	0.187537699	0.348332734	0.067377997	0.388580226	0.168808832	0.60449223	0.597778136	0.021268577	0.675250159	0.392706074
E07000142	2016	0.148155102	1.119234118	1.044204206	0.180545895	0.669766107	0.374813755	1.029872589	0.940844725	0.272306421	0.245135956	0.970430929	0.395683536	0.441958038	0.041878114	2.485373125	0.012344335	0.356111514	0.128945617	0.142293355	0.542519592	0.162125223	0.719735295	0.066676846	0.514550224	0.913270012	0.450942584	0.308160207	0.200873654	0.227961938	0.051780612	0.066333601	0.009838163	0.255924862	0.206769367	0.258938415	0.070873299	0.217313149	0.680543032	0.184896158	0.358183995	0.07062203	0.393449632	0.175401838	0.610433535	0.608161773	0.0173285	0.690631609	0.407856914
E07000143	2016	0.150842743	1.079896303	1.005077046	0.176141009	0.65266574	0.361402333	1.007041096	0.89154389	0.26130325	0.236686347	0.932877465	0.380662904	0.417422748	0.040910616	2.395129903	0.010531691	0.344261382	0.123145542	0.13478721	0.532804799	0.154778981	0.697538665	0.074218883	0.499310118	0.874615265	0.435608727	0.297420177	0.19178609	0.218848804	0.050490398	0.065369188	0.009212144	0.248835985	0.200222535	0.252726486	0.069644284	0.214508647	0.652930923	0.180611294	0.338854606	0.068201539	0.382065983	0.168464134	0.594378043	0.587105313	0.018830794	0.660981898	0.387859734
E07000144	2016	0.156464534	1.120205772	1.049254188	0.179204401	0.678947737	0.373749849	1.045182851	0.943942322	0.272499198	0.262129353	0.994180831	0.39859985	0.434491711	0.044535607	2.465232992	0.011646354	0.375237942	0.136019091	0.148490027	0.556642402	0.160811628	0.72165735	0.07727913	0.526057912	0.927764913	0.458721868	0.317019192	0.206976308	0.226581849	0.058064466	0.068751148	0.00995759	0.26270341	0.211433499	0.264149084	0.072678597	0.233170038	0.699259824	0.1908812	0.377600568	0.072612303	0.411613268	0.179829165	0.634046669	0.622211942	0.021744926	0.704499718	0.402273751
E07000145	2016	0.156840933	1.06573478	0.994617576	0.175580129	0.642277888	0.349418488	0.993472311	0.870753339	0.256710961	0.251312589	0.932325929	0.36969463	0.407462567	0.042802878	2.319016672	0.011635375	0.354515667	0.122038609	0.132579136	0.517225246	0.168367705	0.678848058	0.08057861	0.490300071	0.853516276	0.42753368	0.299627149	0.190522759	0.215590903	0.055475889	0.07043309	0.009356949	0.250488108	0.204763483	0.247692657	0.06768714	0.213299177	0.638608222	0.180659667	0.346744048	0.067040877	0.373362566	0.16656241	0.585918458	0.584104264	0.023440833	0.649991551	0.382166865
E07000146	2016	0.157215526	1.082572463	1.009338669	0.174238018	0.660930779	0.35583141	1.005957826	0.901469261	0.266669258	0.252935166	0.947199821	0.379285802	0.420849699	0.044003777	2.387831552	0.012438691	0.364282534	0.129736257	0.14120879	0.542241695	0.161585302	0.701084153	0.078261366	0.509353225	0.876578548	0.439621319	0.306796886	0.197269979	0.222010946	0.053821304	0.069391637	0.00964422	0.257282953	0.205618029	0.254176032	0.071709117	0.222092336	0.661887937	0.18595176	0.35261272	0.071035254	0.390301046	0.171652099	0.605943247	0.603669131	0.020763574	0.666379754	0.391361444
E07000147	2016	0.14704662	1.15262538	1.079490432	0.171450128	0.719915523	0.360543199	1.037668777	0.972580593	0.291444302	0.269810287	0.990623344	0.406084245	0.461120571	0.04804077	2.55430133	0.012625757	0.39894495	0.138111366	0.155138656	0.580421122	0.169980996	0.763886625	0.06196957	0.534172933	0.935602749	0.465996086	0.327513151	0.222946668	0.243137007	0.055143079	0.073083104	0.011879537	0.268689835	0.217968246	0.266900049	0.078163999	0.231298545	0.712020734	0.187646367	0.383810763	0.080472921	0.397279877	0.192605879	0.633705245	0.638209007	0.019221402	0.70592968	0.434867018
E07000148	2016	0.166525739	0.963414595	0.880902278	0.179647954	0.566544427	0.332334003	0.915974486	0.768777245	0.222891843	0.219145363	0.887958678	0.340508019	0.341802883	0.038973081	2.055123044	0.010640765	0.320439061	0.114382497	0.117513485	0.469982988	0.157072995	0.578874487	0.094251333	0.45493142	0.780479998	0.392567496	0.276458521	0.161745477	0.191955825	0.056848326	0.064842684	0.007066443	0.236426152	0.187080079	0.226427619	0.058956527	0.213741131	0.570417974	0.174355477	0.321882073	0.057635613	0.370117941	0.144494137	0.551279042	0.540777909	0.02442119	0.607739701	0.315969695
E07000149	2016	0.160907903	1.090909418	1.021680399	0.178329897	0.661886884	0.36421388	1.031859753	0.922009018	0.266044178	0.257465199	0.989791886	0.394718189	0.414699536	0.044162414	2.394158307	0.010272651	0.37400795	0.138545415	0.150190781	0.551311976	0.151596367	0.701798553	0.081763935	0.522729106	0.918202089	0.449781197	0.313919304	0.202325975	0.218558173	0.059794609	0.068527153	0.009381913	0.262969086	0.207458024	0.26617736	0.071930861	0.238769255	0.693256666	0.189824545	0.374784161	0.07195314	0.421618128	0.1767457	0.638402362	0.618142151	0.021568438	0.703481007	0.387239608
E07000150	2016	0.146086443	0.99759146	0.923458386	0.18563897	0.582179619	0.360210139	0.962770183	0.823113371	0.238812777	0.201645618	0.891255709	0.364311873	0.375900701	0.034577063	2.204158072	0.009410309	0.297369958	0.110205754	0.116908852	0.470890692	0.155817504	0.612241781	0.088179523	0.465086173	0.82109898	0.408214828	0.271274503	0.167228804	0.195676265	0.048727089	0.062097011	0.00801504	0.22799232	0.18611393	0.23240376	0.060492122	0.193539708	0.590670868	0.17015275	0.309003373	0.056373504	0.362469065	0.145569543	0.540637704	0.537251637	0.017280382	0.610646427	0.341702225
E07000151	2016	0.155533876	1.085979282	1.021778656	0.183482551	0.644062252	0.37502816	1.032747559	0.920267759	0.264427041	0.240385124	0.98613634	0.39549229	0.417519102	0.040588235	2.378215441	0.011194878	0.355708114	0.135693525	0.145772338	0.534037998	0.150050889	0.688147589	0.076568529	0.516542269	0.930971231	0.446850212	0.306680284	0.196877912	0.216320125	0.056314594	0.064092152	0.0090152	0.258502682	0.204683403	0.264638389	0.069558641	0.227610637	0.69664991	0.188245616	0.372206578	0.067699783	0.421005802	0.171572849	0.635195077	0.609122953	0.019399939	0.710120299	0.386028104
E07000152	2016	0.158661411	1.08367187	1.017871647	0.182805148	0.639554435	0.374778612	1.028060484	0.907149353	0.258552383	0.249323909	0.983800229	0.388299381	0.415914259	0.041274696	2.371603402	0.011717683	0.352237072	0.133458974	0.140949294	0.526041221	0.160659369	0.680189737	0.088476076	0.510258584	0.913037942	0.445327708	0.307937791	0.191421787	0.215985296	0.056973142	0.065977909	0.008813657	0.256005583	0.204153289	0.261175809	0.067858283	0.225364738	0.676151361	0.18770045	0.366481535	0.066506932	0.411203536	0.168645466	0.621669316	0.604439902	0.020953953	0.703000098	0.378923661
E07000153	2016	0.161431696	1.029795612	0.963661766	0.178823488	0.606237358	0.356160515	0.990509945	0.847624181	0.244392531	0.233323219	0.948792016	0.371265547	0.384534379	0.039937637	2.237102559	0.010101021	0.336575095	0.124739954	0.131416903	0.505198817	0.154902	0.64045745	0.096028108	0.486682414	0.8603358	0.421799027	0.293143056	0.179420906	0.203616722	0.057783327	0.067170862	0.00806663	0.247547075	0.196805034	0.251235407	0.064427196	0.219714972	0.635506071	0.181642463	0.347083925	0.063094803	0.394302842	0.160578628	0.594581283	0.576787476	0.021169997	0.665989786	0.352843207
E07000154	2016	0.16821944	0.965589734	0.894778252	0.175557818	0.561386692	0.338182032	0.934910362	0.780132652	0.224787803	0.224393521	0.906355971	0.343253559	0.344486328	0.038986167	2.044125416	0.011185858	0.318416473	0.118799145	0.120991932	0.46739184	0.153697745	0.587805092	0.103942303	0.458594494	0.79908177	0.393162812	0.278388959	0.162709578	0.188894144	0.058735515	0.064797498	0.006958137	0.237665929	0.189780069	0.233844688	0.06025387	0.211749643	0.593392581	0.175538628	0.327657232	0.057085518	0.379369672	0.145439492	0.565542758	0.546137876	0.023161195	0.621247202	0.319616001
E07000155	2016	0.155492349	1.101429359	1.035091792	0.181846749	0.650657609	0.380438381	1.042580466	0.933737587	0.260897977	0.251740462	1.005434537	0.399499902	0.425127104	0.041835532	2.3858731	0.012451571	0.360255401	0.135318803	0.147617317	0.52897382	0.160564252	0.694180067	0.086785331	0.514074762	0.93867177	0.45143828	0.313020495	0.199375149	0.217632034	0.058957622	0.06650221	0.009299013	0.257954953	0.207696424	0.264211549	0.069006578	0.230513073	0.701219191	0.188818652	0.378671102	0.067919816	0.419594216	0.173060561	0.630874996	0.611760047	0.019604618	0.711207481	0.386491665
E07000156	2016	0.157879614	1.044596796	0.982269621	0.182610455	0.615283996	0.356464897	0.988337476	0.854600488	0.249408892	0.236892384	0.929463721	0.367265696	0.397547615	0.039430638	2.271689736	0.01161391	0.334188234	0.117946455	0.124722257	0.497625323	0.170059682	0.651133872	0.091773773	0.482157466	0.846620191	0.425720713	0.293175316	0.18026644	0.210400561	0.054206176	0.069248186	0.00841408	0.244133339	0.199822214	0.243896706	0.064698085	0.205934899	0.625417379	0.181050163	0.338412945	0.061578419	0.371739287	0.158807996	0.578183009	0.574054667	0.02331185	0.647721683	0.369044468
E07000163	2016	0.149295278	1.11318693	1.046459942	0.177025477	0.686227602	0.367973077	1.027027802	0.917400735	0.267631787	0.25092386	0.950617429	0.388397199	0.435356064	0.042545346	2.484275649	0.011313039	0.360624939	0.126461229	0.141338504	0.550046515	0.153488334	0.726835999	0.0642142	0.517601245	0.902985197	0.447732001	0.304825125	0.200892958	0.228997107	0.050957677	0.066809843	0.009712738	0.259298752	0.206856012	0.260069693	0.072497789	0.221392045	0.681807258	0.184234887	0.356460354	0.072943431	0.389048359	0.176107462	0.609918482	0.603973942	0.018762016	0.682738224	0.407892583
E07000164	2016	0.149730196	1.103974145	1.034006879	0.177616432	0.668790652	0.368163889	1.029808428	0.92623458	0.266543821	0.248552578	0.968006629	0.396420168	0.428929257	0.042253527	2.450663956	0.010480199	0.359973425	0.130901346	0.146843908	0.548206427	0.151005835	0.716700025	0.068303545	0.51985633	0.920196921	0.448485367	0.309384021	0.203301502	0.223980991	0.054242396	0.064979244	0.009862372	0.256439501	0.20629989	0.264497695	0.071984309	0.227970831	0.690605829	0.184788456	0.365580216	0.07148296	0.406504432	0.17592326	0.622138901	0.606746965	0.018094831	0.696308866	0.398113074
E07000165	2016	0.153153117	1.072193643	1.010032506	0.178537119	0.64348463	0.364490529	1.014577434	0.908405245	0.257901781	0.246316271	0.977084678	0.393661076	0.40431664	0.042293566	2.342557634	0.00986181	0.357906302	0.133319292	0.145541136	0.532503175	0.155317476	0.681226633	0.078403549	0.513938866	0.917141752	0.444983856	0.306284281	0.199209972	0.214466133	0.057321798	0.064971305	0.009369367	0.253519457	0.204536025	0.259276037	0.069067159	0.232447047	0.685421101	0.185689585	0.374403563	0.06937696	0.412994106	0.170665566	0.620930423	0.598776781	0.019409952	0.69321937	0.376395253
E07000166	2016	0.1501831	1.055217675	0.978329162	0.17530119	0.633203583	0.356562135	0.98538131	0.876750478	0.256328109	0.236225625	0.931899575	0.372162832	0.405390941	0.039835706	2.320063063	0.011590391	0.338610841	0.124376617	0.133389892	0.514967782	0.153027261	0.671349474	0.072789328	0.488675519	0.863186696	0.424907839	0.291967501	0.187036469	0.211553382	0.052173966	0.065843008	0.009128591	0.244877097	0.196407269	0.25038121	0.067615511	0.210550259	0.640291646	0.179177324	0.340027397	0.065311201	0.381896015	0.164307955	0.58777724	0.578311335	0.018948997	0.654957196	0.373030747
E07000167	2016	0.150886039	1.110138183	1.045138313	0.175343019	0.680028541	0.362876163	1.026156645	0.933300431	0.273029731	0.25675065	0.968751756	0.394070298	0.431318286	0.044209365	2.462714829	0.010317574	0.370515479	0.134491629	0.1470885	0.558246835	0.157264522	0.724671897	0.066181894	0.525307661	0.917451841	0.453944811	0.312177359	0.206362022	0.227055102	0.053938486	0.066802494	0.009967257	0.259787874	0.20855336	0.261206836	0.073921009	0.227291106	0.692267962	0.185640483	0.368458579	0.07362468	0.402549717	0.179743582	0.62298803	0.61438068	0.020129655	0.694744125	0.404679767
E07000168	2016	0.156882708	1.076457542	1.009942337	0.173439639	0.660267761	0.346693021	0.994521048	0.901544516	0.26518652	0.262098998	0.957416025	0.387215413	0.407112384	0.045041691	2.353374423	0.009494701	0.366623186	0.131963664	0.142514721	0.538942383	0.159774719	0.695297924	0.070150124	0.5102169	0.883239485	0.439650983	0.310047428	0.201093673	0.220617045	0.058772963	0.069715339	0.009628389	0.253269564	0.209100475	0.260017923	0.070722588	0.229822471	0.664968414	0.181748258	0.366398697	0.070615783	0.3999836	0.176160771	0.616186337	0.603060113	0.022886749	0.680937908	0.390010458
E07000169	2016	0.149164952	1.062010505	0.993470746	0.177164654	0.6282266	0.372356298	1.002451496	0.885776901	0.252844007	0.22807258	0.943748475	0.379194468	0.414897772	0.038804623	2.361164002	0.011012635	0.330711106	0.124602688	0.136089809	0.518238257	0.145716771	0.675309217	0.076863432	0.496417077	0.886162582	0.431332537	0.294116346	0.185505601	0.213144753	0.051422925	0.061216801	0.0084481	0.245252147	0.195209997	0.253179491	0.06680316	0.213467715	0.656392608	0.180183657	0.34090699	0.064684045	0.395755175	0.162934723	0.595869808	0.582485046	0.016586417	0.674212669	0.373605209
E07000170	2016	0.147257207	1.069350402	0.991370752	0.186888393	0.622558192	0.372211741	1.002802066	0.889218288	0.259571006	0.222122328	0.935749093	0.387170825	0.411639571	0.037835127	2.36751155	0.011103766	0.325314432	0.120514397	0.1283148	0.510160874	0.163407602	0.668044605	0.075447155	0.490770155	0.877563892	0.432758513	0.291161126	0.183459707	0.215334749	0.050161503	0.065527296	0.009213318	0.240728644	0.196893213	0.244385891	0.065333975	0.203086868	0.634442425	0.175834405	0.335589745	0.062504612	0.3779892	0.159432307	0.572881604	0.573875702	0.016598325	0.656866233	0.377337732
E07000171	2016	0.157046595	1.088422771	1.012491759	0.182984982	0.646387243	0.367575936	1.016830955	0.901355086	0.265301313	0.23791109	0.957006805	0.386713968	0.42341858	0.042058143	2.390498005	0.012264484	0.346170416	0.129431643	0.137519902	0.529537711	0.158698291	0.690266572	0.078561932	0.50371948	0.891936592	0.440373301	0.302832871	0.191943922	0.219683376	0.053996242	0.068791827	0.009223516	0.254402776	0.205232649	0.254217096	0.069340704	0.214897708	0.667790676	0.183897054	0.350503512	0.066915931	0.393370597	0.167166412	0.605318161	0.597210306	0.018504772	0.677352951	0.388006433
E07000172	2016	0.159486743	1.06338967	0.991343162	0.180279187	0.631624492	0.368380756	1.00933907	0.887532405	0.253325411	0.238508367	0.970143912	0.379622178	0.406952177	0.040846957	2.339547438	0.011460581	0.35134975	0.133118173	0.142672422	0.530087605	0.146237875	0.673283828	0.080057127	0.509583798	0.902058455	0.434944708	0.305049395	0.189541976	0.213517115	0.056909244	0.062932104	0.008419187	0.255885264	0.199585934	0.259910504	0.067552823	0.233066014	0.669819362	0.18637291	0.363299803	0.06726085	0.42077352	0.166719499	0.62422081	0.601032917	0.019642996	0.69584476	0.369869557
E07000173	2016	0.169963381	1.061267382	0.987469029	0.180505794	0.635147974	0.358908864	1.007322201	0.867459071	0.252183045	0.249988026	0.960951545	0.369703661	0.397509697	0.044105814	2.284892172	0.012511346	0.35704963	0.130375007	0.13750411	0.52331817	0.159211544	0.670922219	0.088381394	0.502565373	0.864908849	0.425943472	0.303041331	0.186031038	0.213398437	0.059684253	0.069876349	0.008608819	0.258259213	0.205343063	0.254628171	0.067994227	0.225393755	0.651303499	0.186037971	0.356600992	0.066783417	0.400144197	0.165082887	0.608307841	0.595588237	0.023479262	0.665342808	0.36786476
E07000174	2016	0.150195824	1.058208696	0.978161701	0.185082012	0.623797425	0.365782995	0.992133597	0.866467782	0.25319302	0.213077325	0.909224012	0.376293606	0.405631658	0.038178571	2.354529111	0.01080463	0.31124273	0.115187671	0.123458729	0.512281749	0.158520204	0.665349737	0.075555506	0.483104561	0.848945166	0.423500344	0.283434121	0.177912	0.212221415	0.047933593	0.064964608	0.008620753	0.23845322	0.195842139	0.243229151	0.065412416	0.200785027	0.618559846	0.174613531	0.321715721	0.062267471	0.367734724	0.156665992	0.562526195	0.564628592	0.016864756	0.640745493	0.372213686
E07000175	2016	0.162289072	1.06860354	0.997777599	0.177808245	0.645845848	0.35728762	1.007735726	0.878815997	0.254554857	0.247879162	0.946701832	0.375749833	0.402841134	0.04214919	2.330078022	0.010932607	0.355688862	0.126474663	0.136182016	0.528235358	0.155037166	0.684864836	0.079248383	0.500356385	0.8722719	0.430674777	0.30042084	0.191029822	0.215433302	0.055475872	0.069036372	0.008645903	0.255993069	0.204062626	0.254693473	0.06817875	0.22400245	0.654278659	0.188007643	0.353634748	0.067385295	0.394527782	0.166811276	0.6065045	0.59390051	0.022179765	0.667717394	0.378070644
E07000176	2016	0.157176577	1.058466416	0.999834633	0.179775154	0.641558741	0.370187129	1.01193208	0.915082389	0.258902343	0.243075572	0.997704933	0.386904545	0.410842501	0.041965406	2.301494373	0.012355878	0.368058488	0.141977489	0.153712273	0.529041031	0.145907722	0.671457674	0.082001842	0.515704336	0.931150879	0.440650363	0.305654528	0.199041757	0.209167579	0.059360599	0.064619516	0.009282786	0.261217906	0.201032191	0.25939758	0.0693832	0.244944517	0.719479757	0.189432116	0.387236394	0.069701139	0.430736577	0.171143167	0.643888891	0.607564642	0.019201533	0.698765849	0.368378451
E07000177	2016	0.164678382	1.048670247	0.98269149	0.183820998	0.620309243	0.372595179	1.011923311	0.875126328	0.248058663	0.236834611	0.978274781	0.377965688	0.394142422	0.039939068	2.278589658	0.01129745	0.3473865	0.129977065	0.139017686	0.514199306	0.154510714	0.655451086	0.102059421	0.502820818	0.890432768	0.432825046	0.300497841	0.184509229	0.206852318	0.058788129	0.065328432	0.008251566	0.253211675	0.199390769	0.255650191	0.066043256	0.228302651	0.665765301	0.187949316	0.357224566	0.064003357	0.416429293	0.161953564	0.616935456	0.595124223	0.021193178	0.681889416	0.357673816
E07000178	2016	0.179630803	0.930700827	0.877297477	0.181234602	0.547144013	0.320606608	0.911675543	0.735051015	0.209073061	0.252126272	0.921032185	0.323466725	0.311208549	0.038654631	1.901506644	0.011852821	0.35915369	0.128532052	0.120368244	0.438748659	0.169908186	0.540119287	0.113044688	0.462562468	0.773952651	0.391875118	0.291197528	0.158660582	0.180482917	0.068984589	0.066133033	0.006153597	0.249356162	0.192614104	0.226322028	0.05697432	0.231294963	0.583725673	0.19476114	0.341949773	0.055784213	0.401289451	0.143908449	0.592435795	0.555055918	0.034377716	0.61469841	0.290018794
E07000179	2016	0.160910595	1.089402989	1.02854107	0.184222842	0.654058575	0.38239498	1.042003152	0.935202745	0.260978027	0.25469821	1.027650457	0.399763288	0.416489562	0.042927654	2.36049704	0.011651481	0.381741806	0.146872996	0.157668782	0.541264553	0.157539225	0.689444958	0.094124647	0.528935364	0.958900885	0.455413416	0.318519116	0.204153084	0.216842422	0.061990471	0.06648853	0.009492736	0.268906607	0.209210939	0.267369994	0.071045708	0.247326648	0.721514234	0.194901083	0.39643212	0.070666503	0.443170534	0.174014432	0.654275942	0.627037243	0.019949758	0.718847732	0.378448946
E07000180	2016	0.168212657	1.070367591	1.002033343	0.181337021	0.643286097	0.367469648	1.024666031	0.908375848	0.256036235	0.256044261	1.011930907	0.388403853	0.401875765	0.044154817	2.308585761	0.012890338	0.375525089	0.144634214	0.154351325	0.539082452	0.1544065	0.674273931	0.096081802	0.523848015	0.92358326	0.444741785	0.313857352	0.195770984	0.211347912	0.063507716	0.067290762	0.00886077	0.268728983	0.20744399	0.264938756	0.070873115	0.248737585	0.705144858	0.193258031	0.386416424	0.069979993	0.438500192	0.170509722	0.649724652	0.621278781	0.021580951	0.704045709	0.367254987
E07000181	2016	0.159244394	1.090903402	1.027342054	0.184302093	0.650775461	0.377333719	1.040528292	0.92795654	0.260551354	0.253124523	1.014487425	0.399709245	0.412300428	0.042921972	2.363095584	0.010472556	0.372074639	0.139321188	0.150432978	0.539198082	0.158377829	0.68706489	0.089301637	0.524857351	0.94460816	0.45400805	0.315374573	0.202003022	0.216435202	0.061233937	0.06643803	0.009333985	0.261544605	0.209193724	0.265901736	0.070188452	0.241552678	0.706902673	0.190823712	0.391299623	0.07020584	0.432497241	0.175064911	0.644672687	0.618266254	0.021150341	0.716096332	0.3808613
E07000187	2016	0.161839031	1.129249804	1.059305036	0.186501262	0.679258746	0.376223148	1.060095057	0.927412082	0.269480207	0.257673463	1.005665819	0.401197361	0.432381223	0.043767353	2.455717033	0.011554236	0.374431379	0.13183686	0.144550088	0.550746277	0.167244805	0.715716353	0.089692068	0.523935051	0.930321438	0.458082877	0.317602297	0.204206657	0.226810618	0.059734196	0.072421303	0.009572488	0.266718408	0.214777627	0.266695806	0.071020042	0.231437129	0.695575931	0.192210091	0.379075598	0.071838506	0.407784633	0.178536921	0.632128502	0.622127644	0.021787902	0.713188779	0.402289862
E07000188	2016	0.150359978	1.118888443	1.047942261	0.184682437	0.676094833	0.376388479	1.041670746	0.930618452	0.271135746	0.239911213	0.971187688	0.396358528	0.439575124	0.041760941	2.495682666	0.0115783	0.355243333	0.127184852	0.140806176	0.547183955	0.160970237	0.718102646	0.073760569	0.518978864	0.913034144	0.451884977	0.307369787	0.200247561	0.226799927	0.051773439	0.065969914	0.009645858	0.257803544	0.208000975	0.261508398	0.07164201	0.220248161	0.681970742	0.186014599	0.355190143	0.070448812	0.393733905	0.173840341	0.613395476	0.6065303	0.018050968	0.688880122	0.404000615
E07000189	2016	0.152828733	1.124173754	1.051265416	0.18190799	0.680805202	0.373734842	1.042427177	0.931748453	0.27396955	0.249743538	0.975775363	0.398743381	0.438059786	0.043133365	2.495301487	0.011233163	0.362100352	0.129350506	0.143543709	0.554473367	0.160691634	0.72692419	0.072247322	0.520360335	0.918790911	0.45589238	0.312224563	0.203083997	0.229605125	0.053222306	0.067681023	0.009858717	0.259065434	0.209031512	0.263807411	0.072606087	0.223465631	0.686499829	0.1886226	0.360669575	0.072373504	0.400044637	0.177364671	0.620998046	0.61405885	0.019016405	0.697391721	0.407297697
E07000190	2016	0.16105541	1.104583662	1.038617703	0.186471199	0.663798106	0.374061464	1.046676246	0.919815911	0.269691735	0.24671135	0.990232475	0.396292287	0.421239637	0.043009745	2.422928187	0.010909916	0.361431929	0.134203698	0.145398945	0.547704106	0.161069974	0.704674567	0.080414194	0.527214925	0.925131495	0.455045985	0.314682672	0.199161561	0.222775192	0.05753314	0.066617295	0.009214287	0.261534843	0.209962225	0.266614825	0.071288861	0.234929458	0.693361133	0.190038494	0.36741343	0.070171007	0.417915924	0.174833949	0.635864357	0.61788987	0.020481664	0.708920088	0.391251776
E07000191	2016	0.153210597	1.184860945	1.116400396	0.17319257	0.745408578	0.366355508	1.071789017	1.006485065	0.289201832	0.289202657	1.03481409	0.422863006	0.463995011	0.050627963	2.653014455	0.010167676	0.41155167	0.150106579	0.167041369	0.618149303	0.162699402	0.795700247	0.066204503	0.56558141	0.987957239	0.485149761	0.344238273	0.235414448	0.247576191	0.062533071	0.074010147	0.011287243	0.276532339	0.226866062	0.290444074	0.081142725	0.261476274	0.756548817	0.188976679	0.417788764	0.084507872	0.441485024	0.2031463	0.686270684	0.663896191	0.021797994	0.759694705	0.440288212
E07000192	2016	0.15290452	1.048445437	0.97581511	0.180775568	0.609521464	0.371901628	0.993560602	0.87924217	0.254109025	0.219505479	0.929298556	0.379351232	0.4012097	0.03750531	2.325133467	0.010408489	0.320468727	0.121282685	0.13101915	0.505174328	0.146979195	0.660675436	0.075355569	0.490128382	0.873652017	0.429829757	0.288036757	0.180717815	0.209004641	0.049996542	0.061593205	0.008319952	0.240086198	0.193229846	0.246856896	0.064292784	0.211264199	0.640548051	0.180740212	0.328577143	0.062032784	0.390740138	0.156451415	0.585565628	0.57134821	0.016375822	0.659045575	0.365287625
E07000193	2016	0.163631959	1.007696066	0.940228154	0.175947798	0.601332036	0.344184079	0.964825474	0.816906028	0.239341031	0.236562243	0.907307537	0.352159035	0.370731557	0.039714318	2.171855517	0.01043183	0.336382072	0.12179464	0.12594924	0.49304652	0.154070364	0.63008826	0.090666613	0.479234205	0.819189133	0.409539776	0.286231308	0.174365927	0.201120678	0.05702468	0.065539979	0.007628497	0.244599876	0.194462364	0.243492056	0.063788426	0.215016632	0.615422814	0.180378062	0.334834513	0.060995725	0.381986748	0.155970818	0.581406554	0.563720065	0.025019096	0.63188542	0.344901646
E07000194	2016	0.152538144	1.090943594	1.020069921	0.178190828	0.657377514	0.377559169	1.016825935	0.930025604	0.263404799	0.242784835	0.974601777	0.385580316	0.428201575	0.041358246	2.413231353	0.012466548	0.357438405	0.135131335	0.145240552	0.54127821	0.152215081	0.695696113	0.075502651	0.51455856	0.912849947	0.444852331	0.30347015	0.195813613	0.219296857	0.053868468	0.064710004	0.00956565	0.258902389	0.200358743	0.258049884	0.07016554	0.225946309	0.67899808	0.186904154	0.3642169	0.069005496	0.408675675	0.171159257	0.614373165	0.608644524	0.017230837	0.685638603	0.384653347
E07000195	2016	0.158254307	1.069590494	0.99118519	0.181137489	0.634081355	0.363167764	1.002661872	0.885395486	0.259548216	0.238357996	0.945054129	0.379346695	0.40885657	0.040808353	2.33633312	0.010328214	0.339984194	0.12506329	0.1340587	0.519890512	0.157264304	0.673063167	0.075992024	0.49706089	0.873736771	0.43317803	0.300574878	0.186394136	0.215208113	0.054982567	0.065451482	0.008806726	0.247166932	0.200303947	0.250640609	0.066222863	0.216686589	0.643444751	0.18163466	0.344836777	0.064827249	0.391148239	0.165165697	0.596898424	0.586996384	0.020974722	0.669885554	0.375210003
E07000196	2016	0.163194712	1.101550303	1.028141607	0.1800546	0.660423156	0.366847873	1.029888173	0.93127917	0.267862036	0.263246015	0.987535482	0.389557414	0.425522745	0.043617629	2.396526575	0.012862265	0.377784257	0.139121266	0.147990375	0.541266465	0.160189422	0.702083378	0.073587182	0.521484482	0.911395478	0.447172766	0.314735789	0.200024246	0.224353286	0.058921242	0.068567509	0.009460556	0.264890801	0.21020482	0.262260912	0.070650722	0.23126091	0.682233214	0.189788895	0.37671343	0.070028656	0.41472157	0.17421303	0.630588383	0.617847885	0.021827079	0.69388657	0.391152393
E07000197	2016	0.155928654	1.068726524	1.001454043	0.179459679	0.641884546	0.361065975	1.000946236	0.894088988	0.256387311	0.247835243	0.96218164	0.380535988	0.408858185	0.041806038	2.327410332	0.011677395	0.35980256	0.130704249	0.140261404	0.521871372	0.160389916	0.675525639	0.079797923	0.50193273	0.888453074	0.434722329	0.303595719	0.193973146	0.214806603	0.056132293	0.067049599	0.00923123	0.255156249	0.202960937	0.251582025	0.068000456	0.223686666	0.662944701	0.185379707	0.363629399	0.067727092	0.396990832	0.166492434	0.604856189	0.594160818	0.020607247	0.672893137	0.376636241
E07000198	2016	0.153377061	1.098664874	1.024804672	0.177388976	0.658324533	0.366271889	1.019390076	0.91842619	0.267557012	0.248052286	0.964372614	0.389378776	0.427396378	0.042344094	2.416308918	0.011513562	0.358693633	0.130775393	0.143427854	0.539498422	0.152334056	0.708165448	0.069516915	0.510485791	0.90499249	0.442779095	0.307505506	0.199039477	0.222032848	0.054585402	0.066759158	0.009677417	0.25620543	0.204613953	0.259810148	0.070501232	0.224627556	0.678879494	0.185900328	0.361876348	0.070086815	0.402618746	0.174006874	0.618329912	0.604870904	0.019521268	0.690892255	0.394517922
E07000199	2016	0.153771105	1.029891692	0.963503018	0.180270363	0.597921558	0.362919918	0.983418158	0.860687109	0.248263246	0.222884165	0.938654866	0.37238607	0.392970958	0.037344818	2.256494445	0.010522693	0.320821013	0.121949164	0.128627	0.496001278	0.146844821	0.642070638	0.079395512	0.48394696	0.866720275	0.420532426	0.2876614	0.177324429	0.203307729	0.052234476	0.06228557	0.007971974	0.24067028	0.191654696	0.247986364	0.06402153	0.21178653	0.636759165	0.179262337	0.338284379	0.060885721	0.393681658	0.157712581	0.587624145	0.571100791	0.018855549	0.666312589	0.356604904
E07000200	2016	0.151817735	1.112876899	1.050783032	0.178342034	0.67608732	0.372840294	1.040655926	0.93181238	0.269978725	0.254458882	0.995689247	0.396375451	0.436333162	0.043718182	2.447909654	0.011758065	0.375147507	0.137008564	0.149610244	0.550491897	0.156422871	0.718549936	0.073910183	0.523425053	0.934229157	0.453732349	0.316034828	0.205946232	0.225660819	0.056959323	0.068665705	0.009929696	0.265625727	0.210617636	0.266845013	0.07279546	0.232032894	0.706944146	0.188579784	0.381183175	0.073273995	0.413664442	0.179177347	0.634825997	0.620316527	0.019576616	0.709245412	0.403452439
E07000201	2016	0.143835564	1.00786647	0.933086195	0.173487213	0.597153834	0.351828977	0.94982823	0.825139914	0.233246012	0.206525741	0.896978196	0.365375726	0.381349248	0.035357141	2.233738392	0.009503096	0.306697395	0.114489067	0.124624031	0.492523685	0.144522137	0.627509126	0.084231223	0.46829657	0.837134836	0.413736807	0.276965529	0.172650588	0.198825983	0.049570458	0.059215292	0.007830079	0.230057931	0.185009817	0.240123259	0.062924183	0.206263622	0.610861372	0.170134506	0.3186846	0.061274414	0.376912345	0.152155582	0.564087487	0.547754289	0.016584715	0.636450778	0.346876448
E07000202	2016	0.164724389	0.987856932	0.904996994	0.175669534	0.581046594	0.344082402	0.94736875	0.795258892	0.230966571	0.217301213	0.901765087	0.350955049	0.356972333	0.03910939	2.125086354	0.010928176	0.31396684	0.115353843	0.121444633	0.482422491	0.156342977	0.606122055	0.10507249	0.460026655	0.802844061	0.401498319	0.278075127	0.166111035	0.194674636	0.056926386	0.067812872	0.00732947	0.237555014	0.190316889	0.23195909	0.060451506	0.208383678	0.58982388	0.17380283	0.322915914	0.059223965	0.368421981	0.147134619	0.557056738	0.545943417	0.020628637	0.618031971	0.329244737
E07000203	2016	0.15538953	1.111335303	1.037872769	0.180291939	0.665363908	0.372739957	1.036389397	0.933489443	0.270278637	0.247527649	0.975824424	0.39705319	0.431433552	0.042241714	2.462292688	0.011862627	0.361930864	0.130766346	0.143742199	0.544360473	0.160083086	0.713549884	0.079199291	0.517228719	0.916426886	0.452031458	0.310815374	0.199859293	0.226072071	0.054277093	0.068546394	0.00952085	0.258542544	0.207190041	0.262363931	0.071094621	0.221256913	0.682316944	0.188385065	0.359060994	0.069728797	0.400241961	0.174467695	0.615958194	0.610780188	0.017927689	0.694030153	0.397994041
E07000204	2016	0.154137769	1.071177567	0.995358818	0.180068704	0.638096758	0.369484856	1.007382741	0.899946213	0.257410272	0.235052939	0.954561012	0.38276736	0.413646808	0.040192199	2.352456974	0.01165645	0.345354794	0.127957424	0.139474362	0.522690634	0.15689864	0.677952272	0.084062912	0.503634999	0.893320082	0.439078948	0.301625238	0.18944599	0.214904982	0.053958853	0.06346979	0.008945195	0.25107339	0.200299713	0.253866235	0.067791793	0.221728537	0.661389904	0.182604466	0.349601741	0.066395847	0.399912329	0.1656844	0.605556647	0.593412317	0.01831689	0.674762211	0.377101166
E07000205	2016	0.159301829	1.121443182	1.05953364	0.178568494	0.690458103	0.369939708	1.045511843	0.934223137	0.272658677	0.269365687	1.003968637	0.393358061	0.439280281	0.04586135	2.454887164	0.012952031	0.389891154	0.142030636	0.154406251	0.561840182	0.165163754	0.727546388	0.079459787	0.531221303	0.93258216	0.458979925	0.323937804	0.209106435	0.229672226	0.059041301	0.070276702	0.010039549	0.272282363	0.214870094	0.26967511	0.074306369	0.239391369	0.711925732	0.193583583	0.386828886	0.075343361	0.419461885	0.182005617	0.644386509	0.633290014	0.021500608	0.712517817	0.405100781
E07000206	2016	0.144717929	1.096226929	1.025548165	0.176526786	0.671236329	0.36188278	1.011462072	0.90805605	0.269494797	0.24199242	0.937461026	0.384492291	0.431071926	0.042520043	2.440486842	0.010988356	0.35386774	0.123665833	0.13954403	0.538588553	0.162916156	0.712331211	0.070978805	0.506380716	0.886820904	0.443490433	0.303739079	0.198469133	0.22519267	0.050692678	0.067000692	0.010106615	0.25343491	0.207015377	0.253190713	0.072170822	0.214686806	0.665863565	0.180929205	0.346897154	0.071196839	0.376683546	0.173698999	0.592587398	0.596311048	0.017467188	0.663875408	0.402849445
E07000207	2016	0.169044058	1.039956123	0.997725483	0.182113676	0.632890697	0.361946054	1.013312547	0.862475297	0.240166328	0.272024438	0.992050029	0.36952914	0.37515529	0.043750314	2.185167111	0.012314194	0.37914129	0.135233036	0.144097362	0.502231684	0.175814439	0.645377879	0.113363451	0.508206539	0.891017183	0.43493316	0.306897943	0.191488665	0.206194669	0.066299146	0.070348697	0.008670911	0.266336283	0.207483136	0.255791753	0.067546797	0.239598395	0.682648602	0.196956488	0.384465244	0.067919789	0.417731596	0.163867584	0.628912515	0.605589425	0.027259918	0.667220235	0.35162529
E07000208	2016	0.168085018	1.036352553	0.977707988	0.178720769	0.622275473	0.361244455	1.002561629	0.862850112	0.242543237	0.258721114	0.979681858	0.364554563	0.378275579	0.043130673	2.181631174	0.013726717	0.372639271	0.140085662	0.149146883	0.508720133	0.155560605	0.646264533	0.102258972	0.509066337	0.885503052	0.433069808	0.30755768	0.187744318	0.201055518	0.065453664	0.066540723	0.008085414	0.266094006	0.202752339	0.258268374	0.066487117	0.245414174	0.677553584	0.195712333	0.377139744	0.067668296	0.432697855	0.164462223	0.64033562	0.607437621	0.024884839	0.676321619	0.34709024
E07000209	2016	0.163490313	1.056163928	0.991381093	0.186999147	0.633251577	0.370634782	1.004734316	0.882424209	0.245878026	0.243823446	0.976980389	0.378349583	0.396480281	0.041531911	2.290131817	0.013686899	0.360296047	0.133100812	0.141796995	0.511725753	0.16550699	0.64909692	0.100509022	0.508938568	0.894084405	0.439794498	0.30624122	0.188189505	0.208901404	0.061208904	0.067198359	0.008565839	0.260303459	0.200598961	0.252570331	0.066022587	0.235725356	0.668367451	0.190634682	0.364891963	0.066047478	0.413330508	0.161742113	0.619523119	0.603347328	0.021308929	0.680430449	0.357328395
E07000210	2016	0.169818639	1.094250125	1.034724299	0.181349704	0.6783608	0.366957592	1.044865466	0.919663199	0.262263353	0.272322636	1.012300657	0.388572633	0.41152614	0.046042386	2.352905872	0.013000377	0.398342263	0.148357149	0.1581331	0.550372902	0.159813979	0.697944486	0.087642737	0.532580066	0.929284539	0.453434809	0.319795521	0.204543806	0.218638512	0.064347153	0.069540096	0.009342577	0.278082967	0.213602144	0.271350473	0.072994587	0.251426708	0.714105609	0.19858447	0.394953959	0.073833843	0.439934072	0.177805721	0.663669625	0.634498823	0.025677599	0.704360443	0.379399427
E07000211	2016	0.17002168	1.042457439	0.98542677	0.18254575	0.625955241	0.362866678	1.005772189	0.884590237	0.246699908	0.261201978	1.000309295	0.377140103	0.382986981	0.043377357	2.212959729	0.012340103	0.37442425	0.141152156	0.149895708	0.515803071	0.164422364	0.643717221	0.109390667	0.513805882	0.900450136	0.438799353	0.310307333	0.189370217	0.204720683	0.066337624	0.067779803	0.008382357	0.266006233	0.206024486	0.258514289	0.066317982	0.247162954	0.683998788	0.196122602	0.384466495	0.066702976	0.436074971	0.165564576	0.644873583	0.614912015	0.025796069	0.688223435	0.35035785
E07000212	2016	0.16401769	1.065441409	0.992389393	0.183670455	0.638863375	0.374531828	1.017465041	0.888784715	0.248593047	0.237592439	0.978955041	0.382375502	0.40242768	0.041894911	2.318030197	0.012857151	0.35338311	0.132936593	0.144436959	0.525320138	0.156834102	0.661108381	0.099174191	0.510786511	0.899775515	0.443659614	0.305862074	0.188336148	0.210377691	0.05950655	0.065146295	0.008533025	0.258567518	0.201545652	0.256129591	0.067356174	0.237758992	0.678735945	0.190196533	0.35814817	0.066416408	0.420056119	0.164037938	0.626225493	0.605250788	0.020106226	0.686766443	0.360233405
E07000213	2016	0.178383183	1.027194512	0.964527858	0.182945828	0.625352043	0.351521189	1.001795255	0.84403029	0.241552176	0.254286604	0.991903867	0.364289902	0.373301314	0.04288294	2.184218017	0.013424934	0.388196369	0.144879095	0.147900767	0.518939157	0.156343116	0.633894819	0.113278223	0.513970622	0.871909058	0.428867347	0.308208717	0.183802758	0.201353989	0.067776747	0.070822209	0.007912829	0.275251206	0.203420259	0.254487694	0.067003345	0.247466816	0.664407478	0.198832989	0.380815446	0.067638527	0.43334827	0.162209343	0.641841687	0.611275471	0.02614679	0.676360502	0.34118592
E07000214	2016	0.168733043	1.07484927	1.015059693	0.185506527	0.647917028	0.376133401	1.036116005	0.897257386	0.250296517	0.257973704	1.003867798	0.381051005	0.400416342	0.043065444	2.312543074	0.01313837	0.377563323	0.144115183	0.148647601	0.527725873	0.160515716	0.668944495	0.09909081	0.524268035	0.918468915	0.446871633	0.310862436	0.192701549	0.212848387	0.062229065	0.067926618	0.008450183	0.270687261	0.206089086	0.263452488	0.06882621	0.242591187	0.692677482	0.197400192	0.381610484	0.069206591	0.43130271	0.167010925	0.642234253	0.615400728	0.022010127	0.695106454	0.364512799
E07000215	2016	0.160143026	1.088987891	1.019355514	0.182813162	0.65090208	0.378862062	1.042427785	0.921833895	0.255037999	0.246629471	1.008379478	0.398537792	0.413210428	0.042415624	2.376651553	0.011161571	0.372120546	0.13863465	0.153165478	0.541319427	0.152817707	0.691475133	0.096942972	0.523555986	0.943291391	0.45206998	0.313647172	0.201302372	0.214420441	0.061053098	0.068502102	0.008885525	0.266280531	0.206067419	0.266066029	0.068938086	0.243642624	0.706554752	0.192487578	0.386874587	0.070749389	0.431532524	0.172246652	0.643123173	0.618867408	0.018444267	0.716391457	0.377226328
E07000216	2016	0.160240971	1.085071378	1.027267453	0.183350227	0.666378003	0.371695508	1.030591321	0.954911944	0.262952112	0.258665882	1.028844954	0.402268915	0.41883613	0.045061582	2.321652525	0.013254082	0.386987367	0.145814283	0.160292082	0.539744475	0.167807224	0.685578356	0.101785627	0.527935588	0.954500845	0.458933234	0.320354076	0.208247607	0.216087261	0.06573706	0.070982255	0.010190979	0.272063587	0.210910563	0.265060108	0.070731042	0.255527995	0.734605752	0.194362636	0.412067563	0.071953347	0.435147771	0.176950565	0.660141561	0.63489766	0.022077262	0.711542848	0.378761812
E07000217	2016	0.174020945	1.001572293	0.948862012	0.180044911	0.600222719	0.35409365	0.981154268	0.841301923	0.232124995	0.253168235	0.973159593	0.359797148	0.359193431	0.042544872	2.116799545	0.012425433	0.363267184	0.135662094	0.142712757	0.493830046	0.161634206	0.611053679	0.117944262	0.500912297	0.862892115	0.422301981	0.299440345	0.180257102	0.191979078	0.066493145	0.068412258	0.007766327	0.25873534	0.198825738	0.249676482	0.063149335	0.245142488	0.666013216	0.195618517	0.371877548	0.063306468	0.423716103	0.157884105	0.628211796	0.596723826	0.027060469	0.668098029	0.329354362
E07000218	2016	0.158865406	1.074810058	1.005209389	0.179155057	0.635333743	0.366895983	1.016686576	0.909589581	0.260317496	0.249539196	0.984422667	0.388923569	0.409347926	0.041192682	2.346225988	0.011225569	0.358173565	0.135800223	0.14501695	0.530209996	0.151977607	0.681725918	0.077196805	0.509421375	0.906896056	0.439451648	0.306800071	0.19520922	0.214493547	0.057624114	0.065027408	0.009074586	0.254489668	0.203380298	0.258751805	0.068274801	0.228936975	0.677077694	0.18572802	0.370021346	0.066786233	0.417485735	0.169762172	0.623105045	0.602888141	0.021137737	0.697234595	0.378112028
E07000219	2016	0.162470393	1.027268423	0.962817246	0.179765402	0.608375078	0.348196539	0.969159168	0.82754964	0.247085389	0.235657116	0.903876504	0.352356237	0.38776232	0.03887389	2.240891387	0.012441326	0.331927581	0.116924304	0.120292227	0.489288501	0.171106883	0.640320229	0.091923677	0.474869287	0.81244012	0.416227707	0.287766826	0.175499538	0.207745393	0.05378341	0.070405788	0.008086793	0.243629487	0.195921469	0.237010738	0.063742008	0.201003221	0.602905059	0.181199878	0.327758669	0.060176153	0.362534915	0.153376475	0.565066272	0.563550491	0.024991315	0.623102716	0.35782698
E07000220	2016	0.167008505	1.010247669	0.94206149	0.178386221	0.601204714	0.352280064	0.97363342	0.832874755	0.241266846	0.239847932	0.943263795	0.360132354	0.372224924	0.040552187	2.17656138	0.011745407	0.352803065	0.129087171	0.134698432	0.501584205	0.154008884	0.633267743	0.0983798	0.488389689	0.843121065	0.414805602	0.294794497	0.177305593	0.201903822	0.060248951	0.068231947	0.007989314	0.25275319	0.195674322	0.24515677	0.064516154	0.225062514	0.633095756	0.184942246	0.349549153	0.063023875	0.399074614	0.15604968	0.59472765	0.57738855	0.022472252	0.648597017	0.342339617
E07000221	2016	0.160750226	1.092629053	1.032304813	0.176759138	0.672195486	0.363879207	1.025199747	0.938788413	0.269277627	0.26255909	1.000152504	0.396830535	0.421759024	0.0452665	2.379115971	0.01228428	0.384000426	0.143247212	0.15724268	0.553026372	0.153192929	0.702910627	0.076264221	0.527627608	0.928182997	0.453860088	0.317384025	0.206737395	0.219597381	0.061374893	0.068201671	0.009840767	0.270591019	0.209537314	0.267706076	0.072699278	0.245201088	0.715461075	0.194341885	0.393689368	0.073991707	0.428484637	0.179385157	0.655505094	0.631227871	0.023071367	0.707619203	0.388610664
E07000222	2016	0.177537004	0.976774589	0.932514889	0.17571293	0.597858623	0.328707231	0.950512079	0.790233297	0.22962042	0.271980968	0.953864832	0.336777441	0.344530808	0.041748184	2.01883231	0.01221276	0.387816032	0.138598127	0.137102837	0.477385974	0.160666911	0.596786749	0.09770622	0.484952118	0.815127166	0.408021091	0.301070723	0.178835965	0.191561981	0.06910521	0.072095114	0.007422639	0.266856335	0.198898475	0.24252357	0.062210655	0.238982688	0.631969515	0.199049658	0.376854195	0.064597472	0.415637501	0.159582847	0.623767782	0.592488665	0.033707638	0.644634817	0.323526314
E07000223	2016	0.154198907	1.093530599	1.023918884	0.185407261	0.662835201	0.371893373	1.029608539	0.919211925	0.268495505	0.243639493	0.973808535	0.39675478	0.418052753	0.043187503	2.434814536	0.009422462	0.356303249	0.13127981	0.145939607	0.553144096	0.155575477	0.704405879	0.077423218	0.526820631	0.916578045	0.450397848	0.30869994	0.197938219	0.222988336	0.055422479	0.063985077	0.009578567	0.258484089	0.205960028	0.261776218	0.071868478	0.232495004	0.682277252	0.186885993	0.364319411	0.070797659	0.412423755	0.1738101	0.625445064	0.610769739	0.019080838	0.691761301	0.387726171
E07000224	2016	0.158932635	1.123710291	1.057735287	0.179977897	0.702047097	0.364158979	1.043625609	0.929314206	0.279462821	0.261280801	0.97897834	0.391313663	0.43940289	0.046824287	2.497719779	0.011678769	0.384867332	0.137086715	0.150964318	0.573330617	0.164164484	0.735013491	0.074336614	0.537780242	0.91547738	0.460847213	0.319838515	0.207664135	0.233931921	0.056224308	0.069756515	0.010457583	0.272054234	0.214103128	0.267865406	0.076783684	0.236122288	0.699097288	0.192346494	0.370132019	0.076777825	0.406808784	0.182350216	0.634810974	0.630396802	0.021530767	0.69510981	0.409537711
E07000225	2016	0.155128037	1.130916597	1.065954818	0.180351597	0.699454299	0.368417223	1.046064069	0.95795423	0.275844586	0.269571477	1.008310054	0.404405632	0.436370785	0.047189869	2.466531649	0.011999652	0.39661684	0.142342416	0.156939364	0.564412237	0.173459667	0.729686666	0.078267609	0.5378457	0.948155474	0.467382673	0.326839909	0.215926696	0.233662721	0.059183513	0.071849078	0.010993697	0.272626096	0.218975609	0.265714416	0.075505277	0.242026012	0.71715952	0.193113379	0.3969991	0.077548103	0.414862419	0.18359984	0.642737129	0.636395318	0.020514842	0.709424555	0.411231563
E07000226	2016	0.168091162	0.98070094	0.913115008	0.181359164	0.568344738	0.354706469	0.964220965	0.800665944	0.228697107	0.220047843	0.929875687	0.351411255	0.35041199	0.037700575	2.109139156	0.010293203	0.321131179	0.123424977	0.12472271	0.479870607	0.153675931	0.595834633	0.107156144	0.476679328	0.830164485	0.407243126	0.28312498	0.164398969	0.18961013	0.058866964	0.062332089	0.00682958	0.23943798	0.188541042	0.240162613	0.060395075	0.21871423	0.60969192	0.180516743	0.331405394	0.057911594	0.400690794	0.147682606	0.582869872	0.55895585	0.02290066	0.646877235	0.321409375
E07000227	2016	0.166092202	1.11686456	1.057410403	0.186278952	0.678981692	0.378922493	1.058831839	0.937255915	0.265800341	0.268381563	1.022616262	0.397418604	0.426542282	0.045335506	2.419813674	0.013169914	0.386752534	0.142570599	0.154071082	0.552046616	0.167228888	0.708601193	0.092099813	0.536810788	0.942398968	0.461921702	0.322406453	0.205012675	0.225105098	0.062724832	0.070626883	0.009457982	0.275050276	0.21572617	0.271141324	0.072269536	0.24500262	0.717458141	0.197787806	0.394351024	0.072613924	0.432397106	0.177636118	0.656201169	0.636090563	0.023523979	0.717539604	0.391917778
E07000228	2016	0.16192191	1.085060022	1.025127719	0.185673668	0.654067255	0.376567607	1.037846881	0.914861429	0.256575332	0.251596036	0.996957152	0.393320097	0.408510554	0.042334685	2.348191694	0.011740614	0.369718442	0.136400872	0.147961184	0.531927655	0.16233692	0.680268184	0.098808322	0.519128115	0.929966547	0.452568405	0.311364942	0.19636797	0.215971263	0.060873417	0.067841472	0.009086356	0.265849234	0.208279042	0.262851848	0.069688865	0.239366309	0.697623575	0.193508792	0.382007086	0.068800599	0.422286452	0.1703875	0.635797222	0.615122118	0.021019193	0.70438697	0.377348119
E07000229	2016	0.161369063	1.083284418	1.020103259	0.184264132	0.656520758	0.366649164	1.027641303	0.888173613	0.259786919	0.255762766	0.981064701	0.384212111	0.406406677	0.044510518	2.357262539	0.010490664	0.365097247	0.131013877	0.142258901	0.536761858	0.168588895	0.685547977	0.088409663	0.517255127	0.900661287	0.445454279	0.310927393	0.196645829	0.218735132	0.059371053	0.069025532	0.009184327	0.260048742	0.209016276	0.259476706	0.069738318	0.23324862	0.675452149	0.189835249	0.370175948	0.069769005	0.40870445	0.171190241	0.621856425	0.606583862	0.023740593	0.687792928	0.378818798
E07000234	2016	0.159163144	1.070981494	1.003797827	0.175758646	0.647021912	0.363212382	1.011067431	0.916806471	0.257944149	0.251204961	0.979873514	0.38621264	0.409389241	0.043493421	2.319965808	0.012727536	0.363436375	0.137058988	0.151801425	0.534804506	0.151379934	0.685740436	0.079765076	0.510649223	0.907743573	0.438582449	0.307967833	0.198096923	0.215280315	0.058988002	0.06594522	0.009436327	0.259723225	0.205128351	0.260334028	0.070266217	0.237715079	0.691970298	0.185315855	0.375838971	0.070036398	0.41782538	0.170704556	0.630074252	0.609834861	0.019725739	0.687944953	0.376756029
E07000235	2016	0.153108796	1.128383275	1.059200938	0.179271032	0.696811037	0.368396115	1.042710299	0.937681661	0.272124253	0.256386298	0.97700241	0.396333747	0.444305465	0.045214064	2.508324196	0.012239224	0.3756222	0.131856737	0.147131513	0.560560179	0.164216022	0.731497601	0.074012783	0.524435451	0.916099806	0.458889283	0.314125769	0.20765118	0.232345319	0.054832587	0.070774171	0.010409945	0.264639435	0.211402454	0.261604844	0.073820713	0.22461399	0.68685386	0.188392426	0.36403248	0.074594531	0.390354659	0.178827816	0.616680885	0.615710855	0.01868157	0.692887563	0.411144427
E07000236	2016	0.165506439	0.998257838	0.937232878	0.176279981	0.585712027	0.341552548	0.959325516	0.800738194	0.239932957	0.231171179	0.904722008	0.347769759	0.365139038	0.038430432	2.140738704	0.010351168	0.330037787	0.117339561	0.118230913	0.480562973	0.154831388	0.613973309	0.088988416	0.465389371	0.810151799	0.404364234	0.282144052	0.168635827	0.196502006	0.055241344	0.064852725	0.007017656	0.240643735	0.190774525	0.241144014	0.061985042	0.206864365	0.59839909	0.180703322	0.326797687	0.057906864	0.376652554	0.153074359	0.577793431	0.559562831	0.026871134	0.632540035	0.342489792
E07000237	2016	0.155555614	1.010725192	0.941867965	0.181728946	0.592171563	0.358189677	0.966929956	0.827423565	0.236080924	0.220880544	0.92486943	0.361225358	0.376109339	0.037723214	2.200986058	0.010809356	0.324974247	0.118953977	0.126400976	0.487773781	0.152549056	0.623258031	0.088859253	0.47872685	0.841877605	0.414549907	0.285033794	0.171749129	0.200158565	0.055365248	0.062196741	0.007661663	0.240989267	0.191693382	0.242318345	0.062473921	0.214160576	0.616984072	0.177180811	0.334570176	0.060668643	0.386511512	0.153141317	0.576523589	0.561192774	0.020269127	0.644191677	0.34165093
E07000238	2016	0.153386497	1.102200246	1.028117741	0.179170119	0.659976572	0.367563244	1.028824612	0.926358017	0.26703279	0.250616085	0.980302548	0.39670944	0.427007416	0.042086139	2.417535171	0.011710185	0.36589007	0.130988461	0.145769652	0.542172195	0.160433454	0.707104115	0.076386784	0.515473226	0.916363088	0.447815368	0.312053149	0.200732115	0.224460564	0.056487503	0.068237124	0.00974615	0.257010581	0.208778276	0.260730566	0.070676355	0.2259871	0.684362187	0.18461377	0.369083241	0.070240425	0.402506037	0.175065421	0.617177553	0.606880559	0.018996807	0.696181823	0.396260179
E07000239	2016	0.148507739	1.084112244	1.014132473	0.177424276	0.648261516	0.363616153	1.002780862	0.905389669	0.262111006	0.242513725	0.952396874	0.384806411	0.422950835	0.04168273	2.386663216	0.011489457	0.352040247	0.12546616	0.137528507	0.527630151	0.16081777	0.692347182	0.073013849	0.499610631	0.891600871	0.438178791	0.302382283	0.195611839	0.219740684	0.053296418	0.065984194	0.00976329	0.250867154	0.203048586	0.25127788	0.069040198	0.21742206	0.661943795	0.180825778	0.35659234	0.068100588	0.384655096	0.170967867	0.596391086	0.59260733	0.019156382	0.676066267	0.392235839
E07000240	2016	0.162756941	1.004264146	0.958719262	0.17859111	0.618817776	0.355341014	0.973095951	0.844955205	0.234451693	0.244234383	0.959023523	0.354836938	0.374560271	0.040552142	2.129435035	0.014130181	0.357548105	0.133786442	0.139553651	0.485914277	0.160727161	0.622318552	0.112120363	0.491241341	0.860708896	0.420817787	0.291371868	0.18224095	0.197135018	0.06282958	0.066864186	0.00856817	0.258652371	0.192271227	0.243891652	0.064173287	0.233252195	0.668007544	0.189762862	0.369552863	0.063874414	0.403387025	0.157990182	0.61279627	0.588662559	0.024486672	0.641690846	0.335105193
E07000241	2016	0.17258628	0.969817605	0.906344861	0.176598559	0.583519323	0.333197671	0.94652134	0.784136603	0.225144016	0.244818669	0.926341017	0.340147469	0.335457653	0.041250774	2.015863703	0.011766497	0.353319327	0.130536192	0.132702137	0.475545149	0.15622327	0.588174806	0.103997726	0.476009006	0.805623196	0.402582975	0.289908713	0.170980205	0.189949238	0.063293591	0.067900155	0.007141249	0.253721857	0.196839354	0.238060422	0.061644533	0.231999242	0.616388869	0.189014948	0.348340232	0.061403073	0.401211711	0.15031438	0.594091465	0.566494404	0.025815696	0.621119416	0.314042573
E07000242	2016	0.161824674	1.054877074	0.993954223	0.181408521	0.629668369	0.374479768	1.012237378	0.892801624	0.247579798	0.244113472	0.993104294	0.382135372	0.39591479	0.04163034	2.275403927	0.012396618	0.357365211	0.136176779	0.148254769	0.516796639	0.153632441	0.657537438	0.092916346	0.508431581	0.911660287	0.435997493	0.303570876	0.191058956	0.206231471	0.060445709	0.064768281	0.008581013	0.257679806	0.200565603	0.257684966	0.066015541	0.238556041	0.690018159	0.189318189	0.375278893	0.066602353	0.425732002	0.163999944	0.63000296	0.603491998	0.020294333	0.689443507	0.357970441
E07000243	2016	0.180038848	0.983185045	0.912238798	0.17868291	0.583816298	0.335921028	0.957870608	0.788160513	0.231669661	0.240060063	0.927997898	0.34619042	0.344169271	0.042208645	2.056974797	0.011688999	0.33899397	0.126501034	0.128579426	0.485617078	0.158984678	0.599063112	0.10805676	0.475626963	0.802060837	0.399574375	0.28699161	0.166341982	0.193527401	0.063974792	0.068649028	0.007010179	0.251116324	0.200963408	0.240481522	0.063072846	0.220761493	0.608036844	0.181908638	0.341670655	0.059551765	0.392358673	0.148353976	0.587138451	0.561747357	0.026714972	0.620532999	0.321987145
E08000001	2016	0.175297603	0.970350631	0.920115373	0.175835927	0.578554713	0.321650348	0.942117638	0.762463324	0.234479744	0.259301591	0.895257218	0.327554701	0.344799861	0.040998367	2.022529284	0.010778627	0.343718551	0.117824475	0.116721059	0.462243968	0.174095423	0.595998484	0.098727049	0.459431173	0.767787191	0.394556478	0.284382079	0.168571515	0.193034456	0.060181962	0.069917819	0.007300605	0.242645112	0.195908879	0.232329668	0.060939763	0.208117521	0.584245713	0.185897651	0.329869576	0.057548403	0.365755473	0.147794531	0.565911496	0.55289756	0.033630925	0.597655489	0.329816197
E08000002	2016	0.168421452	1.002312563	0.950271612	0.178136754	0.595950535	0.340499028	0.966965983	0.815452806	0.241327624	0.250332015	0.927752679	0.348087366	0.366489909	0.040338203	2.133373479	0.011297044	0.348543786	0.125749381	0.126524688	0.483302711	0.166008465	0.619632886	0.095472621	0.480505178	0.822020165	0.412468364	0.29173258	0.17600999	0.200193163	0.059199927	0.068206587	0.007873853	0.249960836	0.197977203	0.241172379	0.063232289	0.215366728	0.617740441	0.187449379	0.345418879	0.061482786	0.385583627	0.154450336	0.587663359	0.571939748	0.027866209	0.634721014	0.34338521
E08000003	2016	0.192781437	0.835773123	0.776142639	0.167517533	0.484178131	0.280032936	0.8271772	0.614584594	0.187537929	0.262579891	0.833549427	0.269170059	0.252621113	0.037777742	1.626362174	0.010530269	0.330039495	0.10705526	0.093458721	0.387373035	0.179828873	0.481953205	0.127029904	0.395819759	0.63555396	0.340242823	0.260707919	0.138123171	0.158834951	0.065032445	0.070963758	0.004958629	0.227182178	0.181653274	0.199161046	0.050002019	0.199233419	0.484091103	0.180247175	0.302539783	0.046404008	0.333586847	0.121665991	0.516625491	0.496386285	0.04373967	0.513919485	0.253384153
E08000004	2016	0.177467349	0.9351829	0.900800882	0.173873248	0.563769008	0.309234741	0.921468854	0.723368968	0.229283355	0.269501814	0.867694514	0.306089918	0.323352266	0.039054855	1.927273204	0.010230972	0.347839286	0.113495135	0.108460102	0.438861391	0.184096105	0.569898221	0.108484149	0.448941033	0.726378143	0.387080202	0.276996517	0.163371622	0.184777084	0.059337368	0.07144858	0.006807309	0.240315378	0.192837553	0.224512883	0.058644307	0.202935437	0.555098452	0.188641619	0.324808622	0.054368355	0.348416856	0.142434329	0.551334345	0.539127242	0.040394792	0.566040584	0.315272022
E08000005	2016	0.181742029	0.948006588	0.913161206	0.175500253	0.5721792	0.310894024	0.929265244	0.724376536	0.229373797	0.280993468	0.887912997	0.304783591	0.328944832	0.039806345	1.936937952	0.011058892	0.355760147	0.117745734	0.110179163	0.442572342	0.188131551	0.576948192	0.10422213	0.454285438	0.732519714	0.389585838	0.282563897	0.165800953	0.187273871	0.061269994	0.072481845	0.007032648	0.245461532	0.196184233	0.228840847	0.05950837	0.205496093	0.563222251	0.19380764	0.336039394	0.055775012	0.356023056	0.145091	0.563796324	0.548743622	0.044659053	0.576815036	0.319819356
E08000006	2016	0.162740789	0.96026551	0.878687923	0.179424604	0.558387707	0.333372766	0.911446257	0.771051763	0.227513509	0.207434923	0.873862169	0.340559946	0.34580489	0.038006818	2.067441672	0.01089434	0.299793334	0.111313857	0.113492125	0.464509768	0.156659005	0.586928866	0.092834954	0.448336798	0.772580994	0.385815747	0.27136959	0.159409091	0.190450688	0.054580664	0.06445302	0.007213715	0.229441109	0.184985798	0.223670163	0.058303768	0.198469209	0.563171272	0.168195582	0.308015432	0.055613656	0.355500449	0.139102477	0.534427941	0.528375673	0.020528665	0.592203607	0.320050211
E08000007	2016	0.159843741	1.028722291	0.974809715	0.179335567	0.620187173	0.352989283	0.986509587	0.849134897	0.246754415	0.246447138	0.943522074	0.363736543	0.382081077	0.041013136	2.225013928	0.010538019	0.354838202	0.130316639	0.136226611	0.50461963	0.158335743	0.645191246	0.086184773	0.498085774	0.86115616	0.425364718	0.296106915	0.18454828	0.204580964	0.057745582	0.064932717	0.00841487	0.254289096	0.198585961	0.249391124	0.065661337	0.22585563	0.645569569	0.186905434	0.35587519	0.065606756	0.400878728	0.160969431	0.603702974	0.584928475	0.024106494	0.655374112	0.354622827
E08000008	2016	0.162279149	1.007419791	0.945925661	0.182071334	0.592875328	0.343325872	0.961739958	0.810533368	0.244269171	0.235472068	0.905680218	0.351359435	0.372310743	0.038926598	2.169089356	0.010234444	0.328805302	0.116283832	0.119021908	0.478293209	0.167180735	0.624738088	0.087359063	0.470463266	0.809179911	0.407200478	0.284160599	0.172145822	0.201670894	0.054788253	0.067518995	0.007835068	0.240814154	0.195318497	0.23609004	0.062322999	0.202464994	0.598907634	0.179291793	0.327473371	0.058655223	0.365943666	0.151035532	0.564710153	0.557416761	0.025914172	0.621419072	0.349491655
E08000009	2016	0.17710459	0.980736513	0.934196581	0.175303175	0.594245767	0.33370416	0.959880414	0.793219094	0.230926582	0.264405087	0.941206848	0.338984586	0.343848542	0.043014602	2.041457281	0.012393082	0.365538426	0.134062573	0.134905154	0.481082973	0.163516129	0.602282164	0.103770839	0.486454022	0.816428194	0.407132297	0.294013803	0.174866186	0.193380263	0.066166445	0.06840733	0.007522102	0.259751046	0.199578503	0.242737814	0.063349714	0.232277808	0.628932435	0.193142855	0.358536873	0.063060892	0.404317615	0.1535689	0.607508087	0.578491819	0.030496741	0.630656261	0.324297431
E08000010	2016	0.151316828	1.051341533	0.976420342	0.182469487	0.613339821	0.370363795	0.988138426	0.87025645	0.251178435	0.220345008	0.926776553	0.373858824	0.402768203	0.037726083	2.318579841	0.01111264	0.318679053	0.11797056	0.127027497	0.501800546	0.155526414	0.658732876	0.078969324	0.484666976	0.860865047	0.423613863	0.287501645	0.178546347	0.209233608	0.050863554	0.064081397	0.008444928	0.239905974	0.193847984	0.24538744	0.063885308	0.205210527	0.627377793	0.176495132	0.329677845	0.061251743	0.378798542	0.157288131	0.574048987	0.568907652	0.017321692	0.652694188	0.36740679
E08000011	2016	0.146475517	1.036678424	0.971477694	0.183850661	0.613032971	0.363251911	0.983380488	0.853463145	0.250556522	0.207794228	0.911442604	0.371601603	0.401700723	0.036796861	2.317240218	0.010803727	0.311277872	0.117358742	0.124556504	0.498016917	0.155502354	0.649591984	0.073811102	0.484383888	0.850906884	0.421165276	0.282456916	0.176815154	0.208762676	0.047339428	0.063217651	0.008449008	0.238827755	0.192455095	0.240589911	0.063925341	0.200618356	0.619495291	0.174120771	0.318537764	0.061415382	0.372603318	0.153456737	0.561864018	0.560750945	0.01554645	0.641136666	0.362781531
E08000012	2016	0.163606769	0.969931857	0.898574794	0.179427818	0.570014175	0.334374741	0.918674314	0.771969708	0.228447577	0.228734225	0.887196982	0.332834942	0.348237899	0.037371843	2.077874027	0.01118382	0.321323581	0.113232039	0.113948628	0.458119154	0.163662737	0.58893505	0.083389715	0.450951403	0.76933116	0.390266065	0.277026946	0.163494925	0.192259793	0.055060482	0.066618844	0.007355743	0.236400071	0.187922697	0.2233171	0.058442068	0.202478056	0.564127535	0.176543758	0.318671902	0.05713116	0.359934062	0.142451879	0.544978233	0.539175025	0.026341477	0.596952512	0.323426868
E08000013	2016	0.151489813	1.060525952	0.990221842	0.18052932	0.627604899	0.365156264	0.994836114	0.881434203	0.25642613	0.224408972	0.93225546	0.376528338	0.412973821	0.039397991	2.350971291	0.011532627	0.330896178	0.123112228	0.131887993	0.513728705	0.154957224	0.670894184	0.072695022	0.492718343	0.870594801	0.429273158	0.293287416	0.184031581	0.214441791	0.050515494	0.064441046	0.008965361	0.246385055	0.196412532	0.248607688	0.065941138	0.209788786	0.639570177	0.178599613	0.336486072	0.06404086	0.384758126	0.161765099	0.585641503	0.580714784	0.017427988	0.660052951	0.374877073
E08000014	2016	0.150193988	1.073651293	1.006272782	0.180085663	0.652129198	0.361278145	1.002460174	0.885813248	0.260395881	0.235114232	0.937203078	0.378175838	0.415930532	0.041432539	2.387387594	0.011363262	0.344955686	0.124676014	0.136346989	0.524323491	0.159000835	0.687951743	0.070402446	0.502855948	0.872569182	0.43463983	0.298071435	0.191127982	0.219674152	0.050975667	0.065600256	0.00948737	0.252379648	0.201401873	0.250152998	0.06911741	0.214017252	0.652606819	0.182297977	0.340269745	0.068589793	0.381919353	0.165589123	0.586158803	0.586354662	0.017666689	0.654450123	0.383366688
E08000015	2016	0.152058985	1.055818681	0.991837498	0.179196618	0.636401339	0.358008274	0.993133016	0.860003643	0.252520387	0.230427501	0.930564164	0.369647342	0.408175526	0.040617988	2.336798415	0.011233845	0.338315969	0.123453376	0.133031278	0.515869272	0.155448072	0.670029696	0.07430044	0.495489842	0.861216133	0.426821272	0.294590245	0.18616021	0.213074097	0.052827069	0.06498	0.008859814	0.249862012	0.197496003	0.250185613	0.066816659	0.215431114	0.641761158	0.179921223	0.337597772	0.066298274	0.383451454	0.163389482	0.587857391	0.579552778	0.019395757	0.659748021	0.372860356
E08000016	2016	0.148314223	1.045224419	0.972235899	0.181256502	0.616436823	0.362070868	0.977200064	0.866721247	0.255008442	0.22035935	0.913805814	0.371642502	0.402557054	0.038294247	2.317430658	0.010782129	0.320003549	0.11863321	0.126104545	0.503564528	0.158764667	0.657289319	0.073704602	0.482593151	0.850615682	0.4206344	0.285743649	0.179801938	0.211115945	0.049741426	0.065146635	0.008807628	0.239456716	0.193535191	0.240782445	0.064490479	0.201212924	0.619197057	0.174390588	0.32956333	0.06219801	0.370756068	0.157323681	0.566061733	0.566421814	0.017503359	0.64157525	0.368319285
E08000017	2016	0.149987027	1.018909546	0.947169038	0.176702611	0.605705856	0.352039877	0.959181038	0.837499531	0.244891529	0.222036083	0.899668632	0.360015592	0.388493969	0.038013276	2.241032166	0.011013382	0.320565644	0.116631828	0.124125827	0.492906068	0.158328073	0.638932929	0.081805303	0.472571463	0.828301058	0.412289095	0.282088282	0.175716646	0.204950584	0.050909319	0.065628151	0.00843398	0.236862102	0.191481664	0.23703387	0.063279397	0.202356056	0.606715649	0.172257846	0.32643627	0.061161477	0.366452687	0.154064018	0.558981811	0.556183557	0.019337194	0.627740193	0.35737458
E08000018	2016	0.156090252	1.021146246	0.959624056	0.177130893	0.609814877	0.34434078	0.963006369	0.826008011	0.246916334	0.239471186	0.901702834	0.352529635	0.385571759	0.038934676	2.222295842	0.011510751	0.336638383	0.117984254	0.12220567	0.488286308	0.171467109	0.638070105	0.085503566	0.472712791	0.815329722	0.414639688	0.286021527	0.178469545	0.207099549	0.053154736	0.069116006	0.008514663	0.242668354	0.195135061	0.23628698	0.063475063	0.201464851	0.602984699	0.180417075	0.333337653	0.061343578	0.362307173	0.154426696	0.560942847	0.560506308	0.025179087	0.620030081	0.358450047
E08000019	2016	0.169670077	0.945360154	0.876760814	0.171202282	0.559889549	0.31874727	0.906445267	0.750391021	0.223186106	0.240974745	0.874058579	0.322911657	0.330627902	0.039320148	1.976061114	0.010907463	0.329814479	0.11461774	0.116439021	0.452444828	0.163115733	0.577206895	0.095690703	0.445997831	0.751626873	0.383665852	0.276046958	0.163652434	0.18867551	0.057899482	0.068323849	0.007259381	0.236864374	0.188445548	0.222490727	0.058797206	0.2063762	0.563988161	0.178581224	0.321434183	0.057066195	0.359619651	0.142193221	0.547127575	0.536369756	0.028286207	0.579164004	0.313021523
E08000021	2016	0.162921835	0.934753576	0.872559819	0.174363834	0.552314525	0.318492678	0.893321575	0.733906593	0.218733332	0.241332423	0.865843413	0.31668705	0.327507639	0.036704201	1.952282413	0.010671869	0.321027478	0.110974066	0.111141395	0.434137942	0.166352524	0.5614665	0.088534305	0.437904063	0.740865409	0.382585994	0.273311404	0.160155783	0.185290849	0.055441821	0.065177892	0.006882232	0.231286602	0.185818848	0.218632756	0.056354621	0.202815075	0.551457138	0.178666804	0.316615576	0.054467543	0.35437011	0.13944506	0.540850218	0.52790899	0.030526358	0.574471167	0.308170274
E08000022	2016	0.156118937	1.056660033	0.98884148	0.183143909	0.629171918	0.367505592	1.002015115	0.86580185	0.253184439	0.229016395	0.942860375	0.375224979	0.401688464	0.040145732	2.331747458	0.010155865	0.3335301	0.122832751	0.133121481	0.51856696	0.151755642	0.668665193	0.077325812	0.499063403	0.872625448	0.427832527	0.294094183	0.184444487	0.210825954	0.053117752	0.064340521	0.00854831	0.248693048	0.196760483	0.252428393	0.065810845	0.218210575	0.642295764	0.181451542	0.341630839	0.065392042	0.395741269	0.16221408	0.596034041	0.582411627	0.019958966	0.66566381	0.367603422
E08000023	2016	0.153919021	1.053010615	0.985173055	0.183929912	0.632680752	0.357757815	0.990578343	0.85799704	0.254938208	0.223983594	0.931474933	0.37191024	0.405196144	0.040575696	2.325885284	0.011048494	0.332766487	0.122672461	0.131116826	0.516544643	0.153759382	0.665938293	0.072257232	0.49206131	0.859218408	0.422636992	0.290894065	0.183675003	0.212361981	0.052137916	0.065543873	0.008773319	0.249735141	0.197811584	0.246863602	0.066309633	0.210855705	0.633798189	0.178419754	0.337805555	0.065398569	0.382070741	0.160412749	0.585188759	0.578146757	0.019403685	0.651783715	0.371192005
E08000024	2016	0.150991175	1.056039007	0.983937667	0.183618171	0.625802739	0.363200157	0.990402705	0.857625473	0.256226885	0.220663896	0.924045148	0.371393878	0.410909651	0.038684605	2.337662741	0.010973217	0.325220432	0.117512751	0.126444067	0.50605494	0.15578523	0.666266209	0.070405963	0.485843015	0.852653789	0.422406977	0.289341767	0.181287527	0.213278444	0.049469357	0.065497771	0.008627029	0.243461307	0.195377816	0.243021864	0.064714368	0.202707646	0.624851627	0.177474789	0.326122077	0.062899309	0.374872139	0.158285414	0.573518626	0.57120111	0.019075026	0.649148055	0.37406517
E08000025	2016	0.214837457	0.829688407	0.804622848	0.165051973	0.505937305	0.255695142	0.853200497	0.587312545	0.199006748	0.308019313	0.843087232	0.247720975	0.240686181	0.043217788	1.536714513	0.011244064	0.375083749	0.118247415	0.099067238	0.394304532	0.19383522	0.493415666	0.137977414	0.417568241	0.612760161	0.343392784	0.274098101	0.143302603	0.160602593	0.072191546	0.07869342	0.004896996	0.248405569	0.194606308	0.210827841	0.054535159	0.211326825	0.502828731	0.19697219	0.325245204	0.050030675	0.342720758	0.12910438	0.550378897	0.522396346	0.056527855	0.508423562	0.255920155
E08000026	2016	0.186172459	0.905199129	0.862867621	0.171871569	0.547937277	0.301934967	0.898113584	0.6902311	0.21628075	0.26955512	0.872014222	0.292129843	0.298195621	0.040067396	1.831292207	0.011703854	0.355111723	0.12250569	0.111445921	0.434092475	0.174006181	0.5451231	0.109121623	0.445604218	0.705558138	0.374478282	0.278165212	0.157084369	0.177958887	0.063491086	0.07030428	0.006305464	0.245072722	0.190790056	0.219505065	0.05783837	0.213048088	0.54856706	0.189822122	0.327849181	0.055038116	0.361614683	0.139486576	0.557483459	0.538331594	0.040201065	0.56132243	0.290307223
E08000027	2016	0.163794536	1.013914199	0.954920983	0.17549751	0.61053875	0.339920348	0.964515239	0.823510218	0.24767258	0.250177685	0.911668238	0.347238184	0.376851831	0.04114275	2.185104669	0.011835851	0.348585553	0.12335881	0.126714808	0.491221473	0.169507328	0.637213272	0.086388603	0.481799593	0.81235509	0.414457566	0.290458561	0.179778199	0.204951654	0.055325842	0.068073391	0.00853315	0.247866629	0.196734019	0.238854895	0.064762628	0.210358369	0.610721263	0.185631966	0.336472779	0.063001066	0.37221692	0.155250231	0.574944277	0.567724464	0.026938164	0.616256667	0.352077127
E08000028	2016	0.194728368	0.891767802	0.846921324	0.169142634	0.539018951	0.286904063	0.887106499	0.663179379	0.219846221	0.271773655	0.849407997	0.28035917	0.288170029	0.042247325	1.776327132	0.011017948	0.345869837	0.1143486	0.103144412	0.427400343	0.181968034	0.545911321	0.118623753	0.431540917	0.674088203	0.36174453	0.271964727	0.154130156	0.175745762	0.062762929	0.072956866	0.006255301	0.240698845	0.190262259	0.215401548	0.058023391	0.201672771	0.527409467	0.187387303	0.317420638	0.053064331	0.339083779	0.133174589	0.539590032	0.528336665	0.043616676	0.532505226	0.289496884
E08000029	2016	0.163611373	1.028689903	0.9777229	0.175079662	0.628204684	0.345996664	0.98274754	0.841364622	0.246777391	0.257040594	0.941258797	0.354285378	0.383881555	0.042468153	2.202724817	0.012853836	0.365544893	0.132901542	0.138257687	0.504795926	0.159762429	0.648317312	0.086285983	0.493950896	0.848664723	0.423461336	0.298958143	0.186047823	0.207182286	0.059256481	0.067905857	0.00850171	0.259606485	0.201492005	0.248253476	0.066683261	0.226307948	0.649662627	0.190071613	0.360593913	0.067129249	0.395786456	0.162051935	0.606225334	0.587266711	0.025462805	0.644850337	0.356135828
E08000030	2016	0.184425457	0.941081843	0.893959554	0.171146214	0.574098994	0.303945836	0.919214268	0.729296462	0.230532319	0.274891583	0.868559164	0.305030151	0.323744759	0.041720434	1.930106654	0.010992872	0.358356149	0.117733388	0.112480547	0.451596345	0.182151524	0.580761881	0.102466246	0.454153585	0.724047438	0.384501164	0.28080608	0.166680053	0.188608857	0.060395415	0.072362446	0.007300385	0.246084765	0.19474634	0.225784051	0.061117723	0.20782692	0.560297129	0.191275711	0.327646734	0.057360055	0.353098797	0.144133413	0.556328443	0.547011676	0.04106065	0.562511565	0.317549646
E08000031	2016	0.195237872	0.924909486	0.868779022	0.171035076	0.558517203	0.291700904	0.90383276	0.703396097	0.224969673	0.273952295	0.866756285	0.297705383	0.30750073	0.043235502	1.863745141	0.011414298	0.354428609	0.116459537	0.1089285	0.447679723	0.182617439	0.567125316	0.113461335	0.441960936	0.70141335	0.373468259	0.281199143	0.16080201	0.18416267	0.064980939	0.076587329	0.006729935	0.246656898	0.19653495	0.221827548	0.060085533	0.207390899	0.545190063	0.188772591	0.327241456	0.055811518	0.349072556	0.138785919	0.55263771	0.54257482	0.04167154	0.555069557	0.3038749
E08000032	2016	0.174684947	0.893767374	0.872468719	0.170088006	0.542766857	0.296332764	0.892549311	0.683205124	0.2163606	0.273186381	0.850789795	0.292975987	0.303160084	0.036661672	1.816574637	0.009938072	0.346282172	0.110676806	0.104080396	0.414726743	0.191318905	0.536322393	0.11767147	0.434054477	0.698031953	0.375939499	0.271345853	0.157093938	0.175184639	0.060936561	0.069694634	0.006435236	0.234361587	0.187326118	0.218799438	0.056468121	0.201279122	0.535543897	0.187576863	0.31945767	0.052440793	0.342622009	0.137083235	0.540996701	0.522231323	0.04452286	0.547375198	0.297431671
E08000033	2016	0.155386131	1.019595075	0.962775681	0.177791288	0.602892204	0.351036402	0.968232448	0.828609743	0.24392708	0.239306274	0.915607469	0.356510478	0.383478146	0.038451321	2.206519691	0.010812646	0.331806988	0.117989401	0.124943124	0.482959357	0.164320295	0.636274779	0.084548619	0.474492264	0.829006199	0.415303584	0.287861928	0.177983681	0.202793747	0.053986875	0.065648914	0.008258742	0.240134714	0.194490288	0.241148965	0.062494727	0.206717393	0.615830216	0.181004082	0.334999257	0.060750797	0.373786265	0.155322132	0.572638547	0.562548939	0.024303764	0.637551876	0.355446729
E08000034	2016	0.1781184	0.957872536	0.916330776	0.173814083	0.57544617	0.316229535	0.932011974	0.751423229	0.231147116	0.271188574	0.889214124	0.319491065	0.337120863	0.039960365	1.979616087	0.01105867	0.354616398	0.117651341	0.114851437	0.451592611	0.180492404	0.584966288	0.105079463	0.456920377	0.753316756	0.394561141	0.284932772	0.168612484	0.190624167	0.061903332	0.071774698	0.007168439	0.245100996	0.195640439	0.230923853	0.060108475	0.208952993	0.574171208	0.191611201	0.335723776	0.05706097	0.362027834	0.147567197	0.566781666	0.55243283	0.039079987	0.591605328	0.324054714
E08000035	2016	0.168871319	0.942947639	0.87871582	0.172149892	0.556344096	0.325845222	0.914537913	0.753155431	0.220441175	0.229575732	0.889271734	0.327991891	0.334224099	0.039128076	1.989781646	0.01100032	0.328155314	0.119253535	0.119978877	0.458434909	0.150651902	0.575338835	0.093164323	0.452030343	0.772092191	0.383752047	0.276122114	0.16157089	0.18644928	0.058189109	0.06475995	0.006866272	0.237937135	0.185880301	0.227064548	0.058621012	0.211934327	0.57713957	0.176588	0.323626814	0.057389953	0.37553498	0.14352148	0.559500255	0.540777728	0.025121215	0.60273037	0.310589383
E08000036	2016	0.155086799	1.030853542	0.961811586	0.178673883	0.609935735	0.353492989	0.971298447	0.840862376	0.249475211	0.228897654	0.908261439	0.362154694	0.391141762	0.038750287	2.261215964	0.010801174	0.325801171	0.117430238	0.123927205	0.496076041	0.160028709	0.646197528	0.079137589	0.477976254	0.831367877	0.415707323	0.286310347	0.176358411	0.207547976	0.052067292	0.066100241	0.008329502	0.240195919	0.194116105	0.239893284	0.063565261	0.203865419	0.611213135	0.177254098	0.327490416	0.060929251	0.370412721	0.15571446	0.567972993	0.564293168	0.021677017	0.634993957	0.360994151
E08000037	2016	0.155063655	1.046022351	0.970267589	0.184133511	0.617871626	0.361149758	0.982562181	0.859709566	0.252789125	0.221168446	0.927336714	0.373391875	0.398086386	0.039308271	2.315961434	0.010976171	0.327142928	0.119400659	0.128537274	0.509419171	0.156886712	0.656769411	0.077278889	0.489097678	0.852315471	0.423481949	0.289906713	0.180279132	0.209722884	0.051679168	0.064051836	0.008592729	0.242781166	0.194870782	0.241795513	0.064624386	0.209455672	0.620214229	0.178429624	0.329265285	0.063384606	0.379952967	0.156124095	0.575317223	0.570264742	0.018840123	0.644947066	0.364132298
E09000001	2016	0.196091462	1.023765635	0.897916077	0.183526192	0.595123872	0.335849571	0.92738159	0.76430105	0.221824064	0.28110002	0.970618924	0.341692672	0.33624314	0.045806618	2.097086663	0.013582843	0.389434892	0.141727791	0.130021838	0.487960489	0.16895608	0.607300503	0.075459338	0.476001589	0.790755046	0.398366127	0.30244467	0.174295231	0.192173362	0.07814707	0.071517815	0.005078519	0.263564879	0.204468809	0.247603564	0.05974775	0.244108191	0.608410349	0.191320255	0.372177451	0.063952792	0.411789131	0.152705647	0.620528113	0.585176114	0.040066799	0.671766252	0.324475865
E09000002	2016	0.226828304	0.844606549	0.792100965	0.161932539	0.494566506	0.273282539	0.870519068	0.601987675	0.197761658	0.288678166	0.863577395	0.257452071	0.233519813	0.050912893	1.518959181	0.014398866	0.346197134	0.121729112	0.108674514	0.415615074	0.191792221	0.499618596	0.175369942	0.424674522	0.622747424	0.340680263	0.280091651	0.137535131	0.166905011	0.08061445	0.085173338	0.004491089	0.24776548	0.202390952	0.213941643	0.055027067	0.215434285	0.522244893	0.187000699	0.319921059	0.050172638	0.358082626	0.125177766	0.560577217	0.524416474	0.048914584	0.51303684	0.248747064
E09000003	2016	0.21461584	0.919616289	0.907037727	0.178199096	0.561830842	0.2969559	0.934088381	0.695460624	0.209650641	0.339916841	0.956581723	0.291386432	0.279530891	0.046413942	1.731813885	0.013065311	0.428346086	0.139795249	0.120105512	0.427789287	0.206003629	0.540398854	0.141443174	0.46895937	0.72389507	0.387583057	0.305963124	0.165308239	0.178263123	0.084992952	0.08028223	0.006008961	0.280416481	0.20996378	0.233700488	0.059751399	0.240245874	0.589370833	0.220359783	0.380117427	0.060379474	0.40567983	0.146379516	0.621299686	0.586912955	0.056027947	0.583281991	0.288400338
E09000004	2016	0.196472034	1.008134438	0.938375891	0.17833368	0.60087694	0.339217067	0.986136829	0.817011788	0.233794449	0.270029659	0.975303686	0.344379425	0.344032036	0.049505501	2.058159874	0.016094537	0.366435777	0.141755552	0.14445758	0.508804031	0.166359725	0.618894902	0.117239584	0.500372814	0.826667637	0.409261898	0.303770847	0.17393888	0.200082542	0.070763522	0.075513085	0.007448178	0.271758251	0.213661256	0.250432163	0.067757097	0.24530517	0.649724679	0.19563866	0.367158967	0.064090217	0.421121876	0.154305976	0.626957867	0.597374149	0.028520124	0.638412242	0.326351944
E09000005	2016	0.273862472	0.832747544	0.808506274	0.172853628	0.493709576	0.239373986	0.869830228	0.558257778	0.183860638	0.373216876	0.924184777	0.23464495	0.198875841	0.052158504	1.364025672	0.016260241	0.451475881	0.145369716	0.111804784	0.390107076	0.222408902	0.479419591	0.17371909	0.44600274	0.602080373	0.341474612	0.308234528	0.139809306	0.157222136	0.099052943	0.091598228	0.003616182	0.298324231	0.225391921	0.222818866	0.057820012	0.246086632	0.531621933	0.237525829	0.374699068	0.054282431	0.402615713	0.132399817	0.63157612	0.577694476	0.073543174	0.531019673	0.234701993
E09000006	2016	0.184338835	1.034779123	0.97182589	0.18047398	0.626272429	0.353331924	1.001592959	0.858162025	0.242420662	0.275896564	1.018507255	0.362766149	0.366504245	0.048106162	2.134072522	0.014680842	0.386310867	0.146364085	0.152343524	0.517871441	0.169207582	0.63604423	0.11405498	0.517886271	0.879070241	0.42630443	0.31433869	0.186573124	0.203845571	0.072614689	0.073306121	0.00841952	0.276776756	0.212768758	0.256543496	0.068029496	0.254842078	0.685432519	0.201844968	0.392071764	0.068169728	0.43797861	0.163754256	0.650090667	0.618649422	0.02902291	0.673325991	0.341927415
E09000007	2016	0.212508849	0.911874315	0.849627902	0.173658778	0.540804135	0.29320703	0.892234944	0.697077739	0.197180852	0.298809493	1.007779013	0.301272927	0.269386809	0.048271223	1.708561718	0.016000149	0.408410648	0.145300322	0.130065887	0.436369764	0.190537439	0.523940247	0.153442662	0.488825337	0.747645986	0.370688439	0.315887596	0.160325595	0.169295961	0.089881879	0.076579833	0.006189837	0.289937414	0.203553064	0.228184296	0.058147023	0.271713664	0.620770942	0.228179267	0.388313382	0.057598935	0.442891445	0.143845948	0.642778155	0.604931286	0.048323985	0.607489972	0.268886843
E09000008	2016	0.242885314	0.91616928	0.861630784	0.175691981	0.541019646	0.28855736	0.925848501	0.680124115	0.204868451	0.313761795	0.964347607	0.290906848	0.263381861	0.05236619	1.676779963	0.018442962	0.395574064	0.144915627	0.13206314	0.451443058	0.190694389	0.53917245	0.155296925	0.476698156	0.705542124	0.368089332	0.308019693	0.152406735	0.18009028	0.091514631	0.088292712	0.005115556	0.285188983	0.225075029	0.237152525	0.061110034	0.249200706	0.590892702	0.211543082	0.372786033	0.058658919	0.421646313	0.143028362	0.635451562	0.586840572	0.048518993	0.588987933	0.274703517
E09000009	2016	0.244304618	0.856323523	0.861940479	0.177774857	0.524572343	0.261554109	0.90016667	0.60619554	0.193308536	0.36964237	0.949559082	0.261325248	0.224843757	0.049469793	1.493654243	0.0133229	0.450802084	0.143553994	0.114905796	0.392686853	0.221462939	0.482088873	0.162397397	0.45691539	0.655250663	0.357709265	0.313039427	0.15144291	0.16193585	0.100964029	0.085585301	0.004341816	0.296766326	0.218489488	0.227610938	0.056859634	0.249185546	0.560291708	0.240775517	0.381287087	0.058052593	0.420134353	0.140105422	0.635275868	0.591359689	0.06858602	0.563524809	0.252368785
E09000010	2016	0.22989781	0.924079502	0.858161736	0.17118845	0.542350804	0.294929265	0.927447452	0.698080744	0.207416021	0.297879843	0.93441562	0.298449786	0.273104758	0.050745168	1.721251801	0.016873034	0.36872382	0.134640599	0.125198539	0.453567488	0.187505589	0.551704315	0.15587602	0.464667737	0.711467454	0.370188197	0.298027237	0.15435919	0.180368456	0.082943077	0.086336107	0.005653354	0.271205039	0.216982665	0.230855143	0.060194298	0.23626037	0.577818393	0.200248135	0.359140847	0.058264366	0.395522276	0.138185902	0.604682869	0.569479482	0.043210397	0.572229801	0.279677195
E09000011	2016	0.225950526	0.903749029	0.819144322	0.171471697	0.51754059	0.290448615	0.900584359	0.670982465	0.199010802	0.28122818	0.961182533	0.295117237	0.257582182	0.05070192	1.659581182	0.019321848	0.365052786	0.140100816	0.123976078	0.450738792	0.182650695	0.526448871	0.173749302	0.460591663	0.703052912	0.355900171	0.29724957	0.145225358	0.1738904	0.089989117	0.085206214	0.005040488	0.271527058	0.20686887	0.228054495	0.058370534	0.243698037	0.571020761	0.196805017	0.354360982	0.054281198	0.407631644	0.134680306	0.605858055	0.565197235	0.0412125	0.579711921	0.26185505
E09000012	2016	0.222939282	0.857677925	0.780717892	0.169804668	0.472553424	0.281960781	0.849233305	0.610996287	0.180098659	0.287277038	0.954739725	0.273725797	0.229082812	0.046333576	1.527090841	0.019897009	0.375339799	0.14675853	0.112519691	0.407030025	0.183873247	0.475873385	0.155584363	0.442972466	0.672027815	0.337771987	0.289769688	0.133398136	0.160218803	0.090228584	0.076343892	0.004368767	0.268707628	0.195331235	0.209249604	0.051443994	0.236506316	0.525925267	0.199459911	0.344560619	0.051251936	0.40287409	0.126717873	0.595863813	0.548014068	0.046946	0.552175634	0.236918917
E09000013	2016	0.216489762	0.932309306	0.838784707	0.179389468	0.524111285	0.310611095	0.895053739	0.734188155	0.196597652	0.264885257	1.077506516	0.319858333	0.28211543	0.047492278	1.743089037	0.01962242	0.383394355	0.167663615	0.143337697	0.463813505	0.171473686	0.520456713	0.140367606	0.520552734	0.797296207	0.370737444	0.312379178	0.153016746	0.175062678	0.09156892	0.069347506	0.006072309	0.291961983	0.198073402	0.235621157	0.057896051	0.282184535	0.640181753	0.205274115	0.394629983	0.056434202	0.478507692	0.14815482	0.677649931	0.60742237	0.036759977	0.638773848	0.266437478
E09000014	2016	0.227818306	0.909305388	0.828190476	0.17875364	0.513665846	0.298181539	0.902554658	0.677336435	0.198019429	0.284107059	0.969597179	0.304302673	0.261838412	0.046747215	1.68833939	0.015322627	0.374513363	0.137907437	0.118370153	0.4333562	0.188376761	0.516821384	0.143595705	0.457924754	0.723410581	0.359895941	0.297256907	0.147401094	0.173214627	0.088677395	0.077928495	0.00515348	0.271126037	0.207591952	0.227692574	0.05625369	0.240757539	0.556920968	0.204339671	0.357168022	0.054982963	0.407948791	0.134867111	0.601896365	0.56562526	0.04299852	0.594181702	0.264982521
E09000015	2016	0.251113631	0.872011995	0.912263493	0.186175293	0.554517224	0.260121192	0.926569064	0.60406087	0.200719633	0.410146644	0.942459334	0.241826574	0.23071278	0.047987958	1.502870567	0.015247604	0.498121641	0.160370852	0.116163745	0.394239256	0.23477453	0.499801189	0.149688051	0.478797552	0.651048608	0.379571848	0.321378212	0.159441271	0.172279701	0.096259298	0.087932953	0.004799291	0.314270173	0.22237329	0.238022703	0.060347932	0.253646359	0.575702622	0.253401218	0.410684789	0.060796819	0.423518446	0.14666027	0.658853859	0.603666239	0.078068	0.557793095	0.264579704
E09000016	2016	0.175737428	1.040341068	0.972418844	0.179997938	0.625920819	0.352913785	0.998508386	0.86127444	0.248089649	0.261393154	0.985305148	0.367957114	0.378581201	0.045062305	2.194708645	0.013996525	0.371844433	0.143049836	0.147348905	0.521069582	0.163568274	0.64639481	0.101958778	0.51027611	0.874669602	0.430298386	0.310346221	0.187314865	0.207089034	0.065962974	0.072171149	0.00855063	0.269067437	0.210737563	0.254065798	0.068584793	0.243898116	0.671466023	0.194690282	0.374991877	0.067062373	0.42545454	0.161875736	0.632947947	0.605967835	0.024619437	0.66898388	0.350849788
E09000017	2016	0.211821711	0.897118425	0.893379559	0.178442922	0.55278279	0.293072002	0.922215357	0.679064732	0.214085588	0.311756945	0.92306523	0.285399781	0.272130165	0.043695926	1.721805606	0.014700948	0.40118065	0.140361032	0.119518801	0.429093505	0.190589767	0.52751779	0.13797133	0.471357633	0.709450859	0.379506694	0.298129154	0.158352249	0.174618961	0.082076053	0.078435403	0.005564016	0.276240752	0.205190734	0.230689562	0.059028592	0.24024144	0.582202351	0.215024252	0.368756986	0.057547435	0.404615944	0.145388284	0.615871695	0.579426908	0.051330928	0.582803926	0.277272396
E09000018	2016	0.240529483	0.840670142	0.876520126	0.179160151	0.526431728	0.260225413	0.899996618	0.584171798	0.200844497	0.374819202	0.918084569	0.244405585	0.221982332	0.045501135	1.471612535	0.012797928	0.45826357	0.142158086	0.106817838	0.383039205	0.226477729	0.472231716	0.164873486	0.452325888	0.640581446	0.364408699	0.309121359	0.14995102	0.159266357	0.096872966	0.08198591	0.004343243	0.290522942	0.213046347	0.223681658	0.055491696	0.244313625	0.550105809	0.245199648	0.376213204	0.055255231	0.406308681	0.140726681	0.635393097	0.586173205	0.079813404	0.552371447	0.24901443
E09000019	2016	0.217344752	0.927903906	0.841940075	0.180571582	0.526706079	0.301997958	0.888178941	0.717563227	0.19520352	0.284913059	1.041508241	0.313606336	0.273795574	0.047444645	1.758761055	0.018089005	0.402361717	0.159639814	0.132981369	0.455718246	0.181399481	0.524453604	0.151512579	0.50444784	0.759772446	0.372241283	0.320575839	0.153717998	0.17670417	0.092879536	0.077844591	0.00587214	0.290552265	0.199244128	0.227547149	0.056806077	0.27302913	0.613266023	0.218601418	0.387003423	0.05575911	0.461036033	0.144610921	0.666019656	0.605356992	0.046111354	0.618083528	0.265885262
E09000020	2016	0.214882146	0.971728844	0.900999688	0.181638016	0.578868571	0.30714844	0.935423305	0.761997235	0.209015735	0.321541022	1.055819006	0.32868942	0.304639677	0.052841217	1.859835103	0.015240904	0.427477594	0.148243899	0.136258261	0.46266612	0.203959537	0.569514634	0.147999056	0.510556357	0.802003387	0.396937843	0.331978542	0.175800239	0.184439443	0.09256655	0.081108576	0.006981092	0.29775234	0.212713402	0.238162695	0.06071239	0.273509574	0.649877379	0.238234921	0.415226145	0.061974093	0.448520893	0.152887599	0.666166379	0.628726283	0.052703035	0.648820798	0.301388609
E09000021	2016	0.190616944	0.961655995	0.93229663	0.183015499	0.581123968	0.328181883	0.959203682	0.761352333	0.219062925	0.29648153	0.973580244	0.323638057	0.318011028	0.042278744	1.901718969	0.013056892	0.405278304	0.138154172	0.130301903	0.450397832	0.184830209	0.564769587	0.126924486	0.483828418	0.803258722	0.407721691	0.305757677	0.170462933	0.185963375	0.078154586	0.073099292	0.006712154	0.275008525	0.204726894	0.241559842	0.060658052	0.245706962	0.627436114	0.212490355	0.380771288	0.061775899	0.422867841	0.153255498	0.634268559	0.595305484	0.043819066	0.629644502	0.304883138
E09000022	2016	0.23020226	0.936384432	0.794432511	0.179886792	0.496434431	0.312706701	0.897681253	0.712676009	0.194004228	0.246858906	1.063699197	0.330186224	0.265079248	0.04725274	1.725447296	0.025163968	0.345016729	0.160629741	0.140951563	0.481278188	0.163321894	0.517224859	0.139466316	0.501182316	0.775742663	0.352238229	0.303932925	0.138414436	0.177886134	0.096471033	0.072364433	0.005055873	0.282101251	0.206379769	0.236524758	0.057307914	0.266433459	0.586537249	0.19020348	0.377383462	0.05580779	0.45889449	0.140230564	0.642845807	0.579879913	0.030021658	0.627641034	0.255471166
E09000023	2016	0.224712269	0.939431856	0.821647267	0.175701768	0.518950265	0.31196174	0.917455025	0.713655016	0.201720003	0.267744923	1.00349844	0.31928636	0.274563023	0.051768831	1.751134682	0.021745318	0.349630176	0.14438604	0.136456656	0.472679195	0.175275009	0.539997951	0.161960741	0.481888029	0.751934311	0.362204807	0.298839768	0.145303635	0.181451992	0.086826624	0.080217885	0.005412603	0.271850615	0.208791543	0.233300715	0.058126026	0.251649718	0.583681606	0.189261444	0.355581561	0.055485794	0.425075998	0.137703742	0.61647044	0.571672907	0.03330813	0.603678544	0.269277068
E09000024	2016	0.214811307	0.925495428	0.888788149	0.177928504	0.554002026	0.307089021	0.931172802	0.716894746	0.208964907	0.303232136	0.994547343	0.303187756	0.282440892	0.047223672	1.754907033	0.015855579	0.409328329	0.15074417	0.131786282	0.446484342	0.188277574	0.534084226	0.160753687	0.490217068	0.763240154	0.385338819	0.308265645	0.158283026	0.175792082	0.088813603	0.077086427	0.005983341	0.286357585	0.206702691	0.234950961	0.06006794	0.258917117	0.626373706	0.220066273	0.385161531	0.059700438	0.435053008	0.146945372	0.649167543	0.59618514	0.048545539	0.612217501	0.277298133
E09000025	2016	0.254750075	0.766911516	0.767403455	0.169725831	0.451060628	0.237721163	0.827442835	0.494514707	0.175135516	0.353335768	0.870030114	0.215628619	0.176384864	0.045924508	1.231702058	0.012073525	0.425999019	0.128154303	0.098024386	0.3462263	0.232637963	0.417787017	0.177520704	0.400743847	0.548037493	0.323373074	0.290389703	0.124515582	0.14389404	0.096547985	0.085631412	0.002963577	0.266258525	0.206931504	0.203940669	0.049514773	0.224327074	0.484018899	0.215369508	0.329522028	0.045905032	0.369940853	0.123454866	0.584306883	0.531644316	0.074003206	0.487958702	0.210228327
E09000026	2016	0.243460263	0.828840991	0.872714671	0.176846102	0.53017368	0.248968895	0.89815849	0.57720401	0.194982001	0.382245935	0.913656979	0.236483295	0.213171268	0.047620018	1.425677171	0.015041799	0.458484337	0.142166594	0.112143583	0.382380324	0.223959445	0.47373124	0.168907942	0.453928993	0.626434128	0.355961124	0.310292982	0.149084065	0.160147107	0.097402902	0.085777856	0.00428848	0.300609261	0.215132594	0.230321333	0.057428575	0.248953283	0.565920713	0.241747077	0.386031416	0.056523589	0.408649629	0.139842144	0.628027125	0.586063859	0.072145833	0.53929218	0.244841447
E09000027	2016	0.175066967	1.025987459	0.981328075	0.187540585	0.617980354	0.363155113	1.004884696	0.877213201	0.236972504	0.263661164	1.058049389	0.379578166	0.371437561	0.044137365	2.117900527	0.01208903	0.392672721	0.14806737	0.153737693	0.503596046	0.171269118	0.617285341	0.124247954	0.525202516	0.929677784	0.437429274	0.317304954	0.191389384	0.196508116	0.073802898	0.069707471	0.008483788	0.275927887	0.206000053	0.260623359	0.065070033	0.266698767	0.719073967	0.205418689	0.415143994	0.06632273	0.461026197	0.167777935	0.674186909	0.63317564	0.028923372	0.711140872	0.337244548
E09000028	2016	0.240897046	0.909689169	0.789561161	0.174674688	0.497845056	0.285368984	0.884806476	0.668586734	0.189902604	0.272508934	1.008038751	0.303888069	0.243697987	0.050314321	1.601335081	0.02525825	0.36100986	0.147734188	0.135417287	0.453724991	0.183068205	0.5060465	0.166104006	0.489728576	0.718962358	0.346693295	0.307060185	0.139158343	0.168343454	0.099231709	0.081065903	0.004788704	0.288591236	0.209931275	0.22928453	0.056055806	0.267141664	0.581235298	0.204425462	0.380389499	0.054309122	0.444731565	0.133673236	0.636258979	0.581472725	0.042202834	0.595318126	0.248313381
E09000029	2016	0.201134834	0.982089654	0.948461183	0.183414013	0.59413526	0.330909679	0.984021349	0.774256387	0.228775012	0.294931413	0.988264426	0.331492034	0.324257231	0.047024698	1.966126436	0.014014073	0.398524236	0.145794535	0.13722589	0.478488198	0.180975434	0.588035981	0.124799756	0.501270341	0.809467168	0.409109295	0.310534801	0.172734859	0.192232423	0.079922622	0.075516185	0.006636869	0.279425521	0.212332267	0.249042103	0.063435011	0.250151967	0.636791357	0.208899715	0.380590538	0.063721596	0.432014739	0.155955198	0.640601878	0.603250304	0.039824352	0.643851532	0.314293417
E09000030	2016	0.218558097	0.774191642	0.774766262	0.167231407	0.44477963	0.257210983	0.801007836	0.51887365	0.172238547	0.298042014	0.877235853	0.222026502	0.186129571	0.037961424	1.337997906	0.012335426	0.424896244	0.133758461	0.097328229	0.347025253	0.198210287	0.403180812	0.190954115	0.415943403	0.608469628	0.330987595	0.286831621	0.123736706	0.134003357	0.084795829	0.069898706	0.003459231	0.277838123	0.190421763	0.192237585	0.049618127	0.23707795	0.524635898	0.221710116	0.332216858	0.045932601	0.387556792	0.121436945	0.592034942	0.531520783	0.066313124	0.512483359	0.206029502
E09000031	2016	0.224869873	0.887119198	0.831191033	0.172631406	0.512465152	0.292883251	0.898675669	0.667386764	0.200938566	0.295887091	0.941170578	0.28795815	0.256252649	0.048195604	1.640677456	0.014575643	0.375904744	0.135475589	0.120093179	0.427059246	0.19383842	0.513443215	0.157662525	0.45267449	0.697400112	0.358072038	0.294217254	0.146541937	0.170983795	0.086473269	0.079108167	0.005106222	0.265691864	0.208272763	0.2246696	0.056883026	0.236721553	0.55897088	0.201333198	0.349012704	0.054201544	0.400711527	0.134827686	0.595891097	0.562622699	0.046380382	0.572013109	0.262658788
E09000032	2016	0.204694491	0.937092219	0.860950379	0.186352075	0.544041084	0.326002636	0.911709971	0.758968547	0.201404194	0.250445659	1.060359056	0.336454581	0.299740922	0.044091041	1.833673843	0.015690476	0.417147818	0.164192417	0.135493997	0.468620974	0.167677221	0.514676191	0.168037514	0.542465862	0.842802839	0.397384507	0.313883215	0.157478287	0.174978812	0.086040763	0.070784663	0.006842527	0.296361328	0.194507029	0.235830137	0.060527316	0.282089887	0.691193752	0.222346922	0.395402354	0.05799953	0.488749735	0.152876747	0.705046897	0.621501804	0.038130141	0.673332114	0.272358997
E09000033	2016	0.216617108	0.909112195	0.869330849	0.174847205	0.54572034	0.297985374	0.893944362	0.679517696	0.199300722	0.33786624	0.994121136	0.284124162	0.266462989	0.047073983	1.712540201	0.014872706	0.456515315	0.149288369	0.125540245	0.420619536	0.20405884	0.510348841	0.152875612	0.478974782	0.734265453	0.379042448	0.323100423	0.160904075	0.167098081	0.093414948	0.075403371	0.005931197	0.304632806	0.205721726	0.222192285	0.05759778	0.267491162	0.611669856	0.246864499	0.389314571	0.059664974	0.443725395	0.143222773	0.650620448	0.607961529	0.064364189	0.598846214	0.266106448
S12000005	2016	0.155284459	1.079595376	1.003106189	0.185135875	0.660573659	0.364746314	1.008690536	0.904434577	0.273036773	0.240637042	0.949739193	0.381170786	0.420866119	0.043547155	2.402879044	0.012281623	0.36049639	0.132709535	0.140959033	0.540853126	0.159180136	0.696237806	0.0702371	0.522872334	0.880783381	0.438572491	0.301490484	0.192883011	0.220617877	0.0510194	0.066950697	0.009896309	0.259219941	0.20162022	0.248098708	0.071429534	0.220891043	0.654106922	0.18403563	0.34706387	0.070469854	0.392425029	0.167150707	0.595050317	0.60181573	0.019240229	0.656883485	0.384651751
S12000006	2016	0.145302785	1.063437997	0.996815622	0.180959582	0.625772162	0.358686034	0.981665565	0.859524424	0.246994845	0.218068244	0.946576254	0.38148915	0.417481755	0.038277573	2.334560356	0.010257272	0.321395983	0.115883369	0.126213949	0.502702396	0.157946822	0.663615738	0.069705692	0.481593635	0.872796024	0.429493153	0.295832998	0.184199981	0.217111487	0.051995812	0.065960066	0.008635677	0.240146089	0.199131136	0.248567757	0.063936125	0.205733616	0.638830559	0.171366388	0.343636684	0.063317939	0.376671676	0.163573506	0.582940698	0.574924238	0.017558253	0.677032648	0.380962094
S12000008	2016	0.151213438	1.099642282	1.029775923	0.183807552	0.659718397	0.374082213	1.030309513	0.911748221	0.266057141	0.240884947	0.955628739	0.385953127	0.428795212	0.04198389	2.443069227	0.012879937	0.350968583	0.129465956	0.138589689	0.52984368	0.163906384	0.701755904	0.072803584	0.513339313	0.8946981	0.444858808	0.302738894	0.195551349	0.224423972	0.051813049	0.065637676	0.00963879	0.257594662	0.204500471	0.254740788	0.069880379	0.216947429	0.666822397	0.186439939	0.347935326	0.068560005	0.390316611	0.168390781	0.597393185	0.59705602	0.017530558	0.663518414	0.391309589
S12000010	2016	0.153601872	1.092477011	1.033759928	0.184737061	0.653207043	0.374449957	1.039353759	0.898999434	0.258836077	0.240121494	0.963182984	0.386199649	0.418950159	0.041911212	2.410155327	0.01156774	0.344704551	0.127952289	0.138335419	0.5262938	0.160833814	0.694999788	0.079735519	0.514270297	0.903416045	0.446533395	0.301365449	0.194071381	0.220752383	0.052667792	0.06358422	0.008922663	0.256975305	0.205362398	0.259605895	0.068616954	0.22088431	0.676511166	0.188366011	0.350584124	0.067695818	0.397255895	0.166743062	0.606763469	0.594802902	0.017679707	0.67647455	0.382820314
S12000011	2016	0.160153505	0.965485901	0.916884293	0.175547897	0.577548553	0.335826175	0.921785617	0.783021788	0.221270464	0.232379194	0.940769859	0.344820732	0.358680556	0.037845328	2.053140525	0.01098351	0.353746925	0.130610156	0.130031338	0.465640492	0.150826258	0.58471245	0.086863987	0.471624993	0.824869569	0.401817761	0.289468175	0.172338623	0.191164711	0.059861193	0.062697629	0.007417579	0.249908202	0.190459304	0.232226236	0.061341281	0.223264298	0.620496806	0.181512468	0.350475102	0.06064987	0.400941365	0.152589621	0.596357105	0.568859361	0.025773102	0.642360437	0.325111721
S12000013	2016	0.15497861	1.119681226	1.055914849	0.18607853	0.673147698	0.379837179	1.043917127	0.923394931	0.276111628	0.244166216	0.96733287	0.400076485	0.432552339	0.0438219	2.494997434	0.01015363	0.357432129	0.130633855	0.141317255	0.55896867	0.165921528	0.720805753	0.06689411	0.535569414	0.917380539	0.454446282	0.309402007	0.201693555	0.227088901	0.054419395	0.065649338	0.009827879	0.257680277	0.206298827	0.261181596	0.073663789	0.22392414	0.685148597	0.185807015	0.359214101	0.071917883	0.399446162	0.176050492	0.618231662	0.611054591	0.019575563	0.706965644	0.402230618
S12000014	2016	0.156805205	1.083145878	1.009868666	0.189693245	0.636910279	0.382763597	1.027250314	0.897228173	0.258386856	0.227759364	0.973591803	0.387633504	0.421168131	0.040006999	2.402427547	0.011327964	0.338464582	0.127244064	0.135356737	0.523581807	0.157188156	0.678471296	0.08268151	0.510931801	0.903374614	0.441417354	0.301683109	0.186776494	0.21742529	0.053866643	0.064990056	0.008755323	0.2526007	0.200782028	0.255217539	0.06667479	0.218420875	0.662120104	0.183667238	0.348370094	0.065372371	0.404194919	0.163358902	0.604239406	0.594667672	0.018085341	0.68967603	0.377323721
S12000015	2016	0.16134311	1.07333211	1.008251599	0.185176118	0.641842637	0.364231303	1.013557467	0.87805309	0.258552328	0.248645011	0.965926203	0.37637335	0.413376487	0.041199385	2.34316747	0.011774018	0.355367138	0.129992902	0.134395399	0.518111215	0.165102185	0.674046822	0.081084485	0.506326238	0.877230422	0.436981895	0.304801415	0.189162995	0.2164303	0.05610115	0.068252413	0.008820139	0.25622503	0.20351419	0.25411419	0.067340678	0.220537261	0.652753898	0.188300333	0.35423459	0.065802097	0.398654746	0.16591274	0.607318181	0.59755167	0.024261825	0.677214102	0.377589514
S12000017	2016	0.156816327	1.103052457	1.030094339	0.184985333	0.658003407	0.374270051	1.030053583	0.918179811	0.266919033	0.243581212	0.978941949	0.393850124	0.427296045	0.041827902	2.431995834	0.011572366	0.35294579	0.129918556	0.139764409	0.537444361	0.162342927	0.701724205	0.076735832	0.517213987	0.910278119	0.448237762	0.308767503	0.19651748	0.222529425	0.054960605	0.067719652	0.009382053	0.255924647	0.206525015	0.260195081	0.069866403	0.221913868	0.67401661	0.186497698	0.360943746	0.068172998	0.403748844	0.171585377	0.615444178	0.608323289	0.019919015	0.697304672	0.393483565
S12000018	2016	0.153236945	1.109517736	1.037885365	0.188792916	0.660959988	0.380032011	1.030230148	0.910631662	0.265742012	0.226895058	0.965315476	0.388995638	0.439403373	0.040737886	2.479008426	0.012052913	0.334608165	0.123804803	0.134603827	0.534108641	0.161987	0.705569346	0.066740842	0.512519041	0.897551937	0.441903295	0.303219973	0.192130125	0.225504157	0.050906952	0.067005172	0.009341637	0.253837834	0.204915024	0.257278702	0.068109181	0.212711497	0.660588935	0.184472264	0.34516542	0.067236494	0.391169893	0.166500573	0.598918405	0.59938486	0.017803885	0.6833574	0.395693322
S12000019	2016	0.156121206	1.067851455	1.001541598	0.186412432	0.629247506	0.370783203	1.015747003	0.892729794	0.259172203	0.232223322	0.958294912	0.384499535	0.413268194	0.039673557	2.357218679	0.01116371	0.338286806	0.126845706	0.133105482	0.518206137	0.157195673	0.672588574	0.078698264	0.505092025	0.88783918	0.436236854	0.29814817	0.186317005	0.214973939	0.053614331	0.066388425	0.008768402	0.250193331	0.201187871	0.256268711	0.067541737	0.21601635	0.657620802	0.18306813	0.34774359	0.064067455	0.397869442	0.164251486	0.600238109	0.592620246	0.019205506	0.67714949	0.377362723
S12000020	2016	0.148998661	1.103163593	1.026368344	0.186549691	0.661084627	0.378384165	1.026474115	0.917235484	0.26420704	0.233337551	0.96305417	0.394285402	0.431059754	0.040459922	2.45956044	0.011374972	0.342221784	0.125367787	0.135983461	0.536506294	0.162640114	0.699151322	0.076898761	0.51068403	0.901099967	0.445864255	0.302038093	0.194128886	0.221421885	0.052315408	0.066194804	0.009582432	0.251504404	0.203715039	0.254185043	0.069050399	0.21569545	0.66373371	0.182571945	0.350991397	0.067420555	0.389440206	0.169136404	0.595675445	0.595270792	0.017756948	0.67715393	0.391687311
S12000021	2016	0.150507681	1.111112585	1.041910143	0.187164112	0.662269571	0.378823996	1.033004194	0.917723571	0.269884526	0.234597705	0.971542947	0.392566222	0.442369628	0.041246885	2.476731594	0.012462526	0.346815986	0.126663039	0.136849441	0.532412549	0.166733508	0.707428575	0.070108209	0.51416303	0.905672505	0.445992848	0.306584467	0.195489754	0.227101227	0.050988479	0.069376581	0.009842814	0.25603099	0.206737967	0.257614119	0.069495169	0.213219738	0.66998941	0.183740793	0.34952389	0.067828086	0.391447648	0.169871639	0.600204217	0.602845417	0.017357319	0.687431566	0.402543613
S12000023	2016	0.155259984	1.101857278	1.019983276	0.185412933	0.650005382	0.371876345	1.028942767	0.927867286	0.264711643	0.248708231	0.981041602	0.395973884	0.422403023	0.042019602	2.441542625	0.009892977	0.350008748	0.13379404	0.141103684	0.545013428	0.152401561	0.702695748	0.068380885	0.52284808	0.91781061	0.450577653	0.310261731	0.199452772	0.223036629	0.056347872	0.06337402	0.00911075	0.256159802	0.203883134	0.266352275	0.070499025	0.231452226	0.673195371	0.184365417	0.370339231	0.069952979	0.414528434	0.175235233	0.622411319	0.60698448	0.01897441	0.697936907	0.38848881
S12000024	2016	0.155632862	1.11030317	1.038469525	0.185488486	0.669951796	0.374124848	1.038003421	0.928332119	0.271791736	0.247064852	0.990194039	0.39919533	0.43109456	0.043143441	2.454333955	0.011145818	0.363475685	0.134788026	0.145245736	0.548878069	0.159460346	0.71150445	0.071830601	0.527004662	0.925187772	0.453128288	0.313093685	0.201221208	0.225331468	0.055061271	0.06700339	0.00979404	0.261661157	0.208120527	0.263584757	0.071733856	0.228921204	0.688736067	0.188717325	0.368223442	0.071362585	0.412167945	0.174500956	0.624851437	0.61470178	0.018587214	0.701573672	0.396081671
S12000026	2016	0.151482335	1.123972332	1.054975513	0.184807238	0.678621172	0.373520035	1.04216776	0.939917717	0.2727865	0.249065588	0.988218305	0.404195145	0.441275549	0.043282834	2.489131453	0.011723048	0.365020216	0.131590459	0.145386837	0.548911462	0.161588782	0.725977045	0.070311659	0.526560852	0.931788105	0.455778317	0.315311719	0.205312543	0.230780776	0.055245	0.067777921	0.010039972	0.261443619	0.211562323	0.264810391	0.072224485	0.224889216	0.698057831	0.187498574	0.372000717	0.07140639	0.404573397	0.177676488	0.624345648	0.616617353	0.018666609	0.706503731	0.409863142
S12000027	2016	0.154780461	1.063198595	0.985745555	0.182360977	0.628704817	0.371048741	0.999289958	0.89954874	0.25295567	0.225407291	0.965703765	0.383348085	0.415199027	0.039735048	2.341667266	0.012306778	0.332487291	0.129536137	0.140600652	0.525117087	0.143670817	0.669764383	0.076956027	0.499680284	0.89727297	0.429324224	0.298167777	0.183475455	0.208990267	0.055124253	0.062076186	0.00859341	0.247478975	0.195776704	0.259373806	0.066627598	0.223077506	0.666658009	0.181149801	0.353280975	0.066822865	0.41074201	0.165459813	0.61024058	0.591232789	0.016699635	0.682959068	0.366015858
S12000028	2016	0.15341553	1.126993295	1.060668808	0.184654422	0.686023326	0.377129821	1.046385823	0.936444281	0.274827143	0.248097869	0.98680206	0.399104269	0.447358389	0.044107675	2.517864151	0.012102778	0.366300106	0.134974939	0.145777193	0.558326995	0.161005152	0.725828321	0.068307342	0.529826292	0.928331757	0.457347053	0.313440192	0.204318373	0.230780892	0.05311623	0.068098549	0.010107083	0.264937806	0.209539506	0.263876131	0.072758706	0.226831542	0.693024717	0.189068831	0.364911275	0.072994917	0.406053079	0.176425471	0.623386601	0.620690649	0.017907195	0.703774676	0.407389524
S12000029	2016	0.157057694	1.089003769	1.015220167	0.189107947	0.642634186	0.377062961	1.027160355	0.904894892	0.262844383	0.233567989	0.973685972	0.39132734	0.421059067	0.040582995	2.410948435	0.011540782	0.343335432	0.130394222	0.13633808	0.526989713	0.160512504	0.68353149	0.076133211	0.514166473	0.902926683	0.44483737	0.303270351	0.189833963	0.218846995	0.053490129	0.065507725	0.009179628	0.253746909	0.20230611	0.256798785	0.067816947	0.219006549	0.661213935	0.185721298	0.35074023	0.06600938	0.404489255	0.164924503	0.604819587	0.597172635	0.018397691	0.685546346	0.380581786
S12000030	2016	0.155365995	1.087974042	1.017336084	0.187528552	0.65144773	0.378288282	1.025860939	0.911700052	0.260386501	0.23998622	0.977960307	0.3915679	0.41918283	0.041523841	2.391942239	0.012346589	0.35740164	0.133355773	0.142347102	0.527386813	0.158764264	0.685598965	0.078125223	0.516456578	0.914320445	0.445687048	0.305718719	0.194862618	0.219747307	0.055720541	0.067283597	0.009350523	0.260672985	0.203874202	0.256946468	0.06873883	0.227145513	0.677509269	0.187138434	0.364250166	0.06876094	0.408521952	0.166484545	0.613160578	0.603947771	0.017758904	0.68559761	0.380766233
S12000033	2016	0.167223013	1.007711084	0.931098779	0.184150607	0.589767521	0.355956494	0.956714719	0.815262803	0.233447672	0.22735955	0.942338607	0.354629493	0.366547469	0.038879226	2.165843197	0.011449249	0.337371712	0.122950978	0.126006248	0.485462833	0.15471881	0.613872236	0.082218033	0.475851299	0.829756819	0.406283962	0.289343359	0.172813522	0.198695719	0.057514124	0.066183679	0.007638733	0.247641375	0.190825007	0.237753092	0.060659337	0.218885257	0.602377263	0.182263956	0.339510542	0.061138487	0.395739238	0.150842385	0.58144959	0.567530304	0.022619557	0.642408958	0.333119616
S12000034	2016	0.15596205	1.083413106	1.00872256	0.184171193	0.636510886	0.379367544	1.024969092	0.899278353	0.254367895	0.236386754	0.969356822	0.386346794	0.416275463	0.040276355	2.378702911	0.011980476	0.338751872	0.12734444	0.136610704	0.522067171	0.159101418	0.678778545	0.087215007	0.50449606	0.900895547	0.439782581	0.300876371	0.187237206	0.214944426	0.054913614	0.065191553	0.008692759	0.250793554	0.201513191	0.256066409	0.066977626	0.219396624	0.663650488	0.183807235	0.352612833	0.065047842	0.400590092	0.164738882	0.603354487	0.59260643	0.018555579	0.685479706	0.376454661
S12000035	2016	0.15582724	1.133740834	1.061951865	0.185073782	0.690719367	0.372390404	1.04518451	0.944469498	0.279795583	0.25637156	0.994141711	0.403193065	0.441962598	0.044869339	2.512507674	0.010953086	0.373041864	0.135539567	0.148496065	0.563750037	0.160552383	0.731308551	0.065210039	0.532058071	0.930121124	0.459047993	0.318787786	0.208618045	0.230245667	0.056168333	0.068133632	0.010373845	0.265581933	0.211713495	0.265623146	0.073402651	0.230676397	0.698810595	0.191324408	0.374697716	0.07405732	0.410398512	0.181923677	0.633965488	0.626125632	0.020274434	0.710956494	0.410925696
S12000036	2016	0.171812108	1.076584145	1.003691563	0.192920733	0.642260066	0.379936974	1.028066811	0.902269512	0.265034788	0.255204329	0.997028466	0.381494746	0.402182645	0.042946365	2.348248272	0.012010445	0.368165044	0.139470354	0.140518651	0.530268733	0.164149413	0.670296454	0.082064051	0.521870576	0.893815991	0.438373582	0.307913305	0.19068688	0.213517827	0.060265078	0.070310104	0.009232305	0.266622823	0.203603466	0.255100051	0.067936881	0.232620276	0.655044648	0.198193534	0.36631041	0.067247877	0.421180654	0.164302886	0.618038726	0.612129606	0.024722454	0.682153099	0.364885273
S12000038	2016	0.162422619	1.078513326	1.006730073	0.188363725	0.641553285	0.372836269	1.018953401	0.889083673	0.258082917	0.231245102	0.971650108	0.382410272	0.414565802	0.041399021	2.379523378	0.011385443	0.343776637	0.130132134	0.136687465	0.527470933	0.15596611	0.676558566	0.076985268	0.514039084	0.890856122	0.438280214	0.302745805	0.187502122	0.217465096	0.055137622	0.065960189	0.008728072	0.257471058	0.202243175	0.254959179	0.067177349	0.221628142	0.656950594	0.186389321	0.350396491	0.066228388	0.404716007	0.162846279	0.607065131	0.598187193	0.019327112	0.681737371	0.37419124
S12000039	2016	0.151401856	1.075977755	1.00504935	0.187536283	0.639572421	0.371743753	1.009767567	0.875887591	0.256955929	0.216387759	0.946239881	0.381635362	0.422617068	0.038965674	2.401821023	0.01133003	0.325738373	0.123037707	0.130951768	0.519674086	0.152707737	0.678071231	0.070255164	0.50189113	0.877277269	0.432019638	0.294953262	0.185262258	0.215049704	0.050115807	0.063687072	0.008777874	0.249227918	0.197389192	0.251690778	0.066044314	0.211326277	0.644103685	0.180053439	0.332168128	0.064780189	0.390215648	0.161059289	0.587895583	0.583520936	0.016694263	0.670962835	0.377901112
S12000040	2016	0.156259774	1.054776656	0.98477306	0.189697867	0.610993772	0.374568089	1.009548936	0.862776921	0.251470871	0.216957473	0.94315637	0.379528902	0.403562277	0.037016052	2.329764739	0.010761124	0.319008667	0.11928691	0.125812327	0.501432933	0.1552402	0.65550586	0.084726521	0.491650115	0.869604288	0.42925025	0.288945433	0.17761655	0.20840395	0.051408383	0.063286325	0.008090361	0.243085159	0.195193515	0.249505388	0.063950084	0.206425425	0.636859163	0.182417276	0.329017815	0.059713721	0.389605539	0.155357666	0.582538508	0.571670035	0.018310968	0.662346139	0.362395516
S12000041	2016	0.155532902	1.101357971	1.031942154	0.184856821	0.661088682	0.369628182	1.032316571	0.916140658	0.269504357	0.245424031	0.978484359	0.394884686	0.430283996	0.042179886	2.422154453	0.011650881	0.357485233	0.131873961	0.142992058	0.542998517	0.157340721	0.704385337	0.075038236	0.514674836	0.912332984	0.447336117	0.309897952	0.197886981	0.223704036	0.054783051	0.067473875	0.00961638	0.258796646	0.207493995	0.261513003	0.070311459	0.224688907	0.681180931	0.18743532	0.362359929	0.068803595	0.406180785	0.172054034	0.620679102	0.608383676	0.019474748	0.69702431	0.395034396
S12000042	2016	0.159388325	1.096261121	1.021850568	0.191656892	0.652064192	0.374260107	1.027482541	0.902104834	0.270068824	0.235552768	0.960072439	0.386476848	0.423495223	0.040959486	2.429865446	0.011993489	0.34359629	0.125397757	0.132262439	0.527170997	0.16904393	0.688955781	0.07745086	0.509609482	0.88205205	0.442198809	0.30143768	0.189505622	0.221937026	0.052463372	0.069219215	0.00921045	0.25519174	0.20423298	0.251291182	0.067982042	0.211442017	0.648826245	0.186502206	0.342601585	0.065791271	0.388350603	0.164096494	0.593211873	0.595731333	0.020177542	0.668941844	0.387646019
S12000044	2016	0.158712306	1.051039396	0.982972688	0.188870207	0.616950942	0.371745061	1.003678866	0.869817451	0.254515245	0.220971055	0.946169212	0.377896822	0.398486943	0.03848177	2.316967133	0.010855793	0.325763152	0.123234198	0.129134568	0.505268194	0.154326431	0.65568122	0.08038912	0.496994937	0.869786654	0.429508833	0.290694347	0.179449084	0.208505109	0.051756883	0.064534969	0.00835992	0.247440221	0.195730296	0.248186788	0.064585197	0.211791966	0.636660054	0.183412603	0.33297967	0.062074887	0.393398409	0.156072429	0.587645681	0.578175728	0.018442704	0.659105199	0.361986157
S12000045	2016	0.161584277	1.100093528	1.039266331	0.184067674	0.665325455	0.374961679	1.039874747	0.907031436	0.261661357	0.251383894	0.9978667	0.389517551	0.427609844	0.043192126	2.39894288	0.012452935	0.365111293	0.13631059	0.146396898	0.533538136	0.16134641	0.696878652	0.086869205	0.521045423	0.919571198	0.450325545	0.313740477	0.197979417	0.222260959	0.057434576	0.069068294	0.00923747	0.265961276	0.209759365	0.263413376	0.07034233	0.228290441	0.695173281	0.192016995	0.370918886	0.069853905	0.414302387	0.171514676	0.631288623	0.615997133	0.020224647	0.69923987	0.38896451
S12000046	2016	0.167659124	0.989464587	0.923497171	0.188655118	0.585127887	0.347553217	0.945746811	0.787500808	0.233649389	0.237574112	0.929491499	0.342954327	0.355863309	0.038758267	2.134107921	0.010226852	0.336896713	0.120822125	0.118874035	0.471848254	0.167195493	0.59720134	0.081849279	0.474123314	0.799432972	0.40195885	0.286532947	0.168959235	0.19449342	0.058069208	0.066112052	0.00759843	0.246449503	0.191853796	0.229501631	0.059494074	0.214623249	0.582185712	0.184930938	0.331396861	0.059234477	0.382804501	0.145643816	0.567551714	0.558799883	0.029179808	0.621784833	0.32638067
W06000001	2016	0.15180646	1.088979194	1.016870144	0.176755309	0.655075958	0.35859705	1.008421971	0.907780671	0.27284993	0.241877624	0.945035056	0.388627738	0.425032962	0.042142336	2.409994749	0.011810443	0.353756246	0.126292621	0.139842244	0.530508437	0.161992035	0.703420609	0.066948223	0.503076194	0.893315238	0.442248353	0.305388101	0.197715705	0.225662618	0.051138399	0.066768168	0.010122774	0.251779435	0.204229111	0.252836041	0.07056807	0.214778014	0.665929624	0.183219241	0.349500041	0.069682226	0.386331169	0.172239643	0.600871499	0.597468631	0.017630671	0.676787955	0.401157669
W06000002	2016	0.151020338	1.067588108	0.997712724	0.179947315	0.643470785	0.353562448	0.994217749	0.882211666	0.258224351	0.24597294	0.94408532	0.378254042	0.407509896	0.042068497	2.324424409	0.010442501	0.353308888	0.124948043	0.136343129	0.519334234	0.167009431	0.679471437	0.077753866	0.497770809	0.876291084	0.435260961	0.302942078	0.194287157	0.218934676	0.055445189	0.067601674	0.009388518	0.249494088	0.20540181	0.249534947	0.068515911	0.219258444	0.655510157	0.179971459	0.358837317	0.067906814	0.382516997	0.168387148	0.5929713	0.588739961	0.020709734	0.66456361	0.382648115
W06000003	2016	0.153056058	1.118129062	1.045228669	0.177431187	0.68429904	0.366665156	1.028905523	0.925785148	0.273513079	0.251568346	0.967711409	0.390601082	0.436799781	0.044847384	2.482132641	0.011627995	0.367990216	0.130822399	0.146200793	0.556602406	0.164744278	0.727713695	0.068407245	0.523798989	0.910902995	0.451301781	0.314061415	0.205288476	0.230413061	0.053681473	0.068554809	0.01026821	0.260759245	0.209920398	0.260831687	0.072968041	0.227518176	0.685695872	0.186507171	0.361151411	0.073855761	0.396456844	0.17777354	0.616329535	0.613189002	0.019082802	0.691066461	0.407767303
W06000004	2016	0.150943593	1.090774	1.019943195	0.178486569	0.657382886	0.362740748	1.015504959	0.898255103	0.263882904	0.245456239	0.954678072	0.382707685	0.424890795	0.041924219	2.397737407	0.011131187	0.353252911	0.125430159	0.137631441	0.530638584	0.161353244	0.70008945	0.071994543	0.502101512	0.89030448	0.438867193	0.303989239	0.196892375	0.222083671	0.053806912	0.066807351	0.009691536	0.251125522	0.204949453	0.255348361	0.069460576	0.216926821	0.665261464	0.181638262	0.353912043	0.069364794	0.387148698	0.171898779	0.601170145	0.595363635	0.019913329	0.677797862	0.394392429
W06000005	2016	0.154476154	1.083333207	1.011511831	0.181590625	0.641910432	0.372829012	1.01856991	0.888759879	0.255462113	0.234239703	0.960895803	0.38156868	0.419163468	0.040416826	2.38839913	0.011978308	0.343918363	0.126225042	0.135816677	0.52317488	0.157121742	0.684936372	0.080523382	0.501886329	0.8919984	0.436806936	0.301596897	0.1893651	0.216929033	0.054092381	0.06606101	0.008944101	0.251392595	0.200760718	0.256281647	0.067472302	0.217896158	0.659949844	0.18305692	0.347870016	0.066393777	0.395359976	0.166832373	0.600910662	0.591282674	0.018715476	0.680946736	0.379958136
W06000006	2016	0.152391793	1.055480038	0.981596539	0.18172299	0.621638888	0.367994358	0.993877919	0.866007819	0.250756324	0.222641901	0.929220335	0.374364806	0.403855565	0.038149891	2.326070607	0.011373018	0.324355924	0.117668408	0.129157732	0.50749513	0.156853292	0.664038708	0.082453078	0.486736588	0.863186008	0.426287811	0.291432065	0.179522553	0.210615987	0.052161712	0.064543088	0.008457794	0.242987703	0.196124152	0.250443439	0.065256983	0.210027739	0.633154277	0.177681207	0.332428963	0.062382076	0.382451731	0.160097504	0.581085181	0.573714057	0.018012439	0.658037199	0.36787301
W06000008	2016	0.151109388	1.069306046	0.996457047	0.171788445	0.641796181	0.345725012	0.979564106	0.879854653	0.256650848	0.250241137	0.945587814	0.37486224	0.410128815	0.042649933	2.304043942	0.010718267	0.365606511	0.126858414	0.139229644	0.516752905	0.161648144	0.685092225	0.068237414	0.490547326	0.874676533	0.429000754	0.303886963	0.199677077	0.219819838	0.054812229	0.070130027	0.009800477	0.250366999	0.203253968	0.247625199	0.068477892	0.217257562	0.655295702	0.178748425	0.359936331	0.069835924	0.384443536	0.171089404	0.594888244	0.590794569	0.020640555	0.670279528	0.385307986
W06000009	2016	0.148133139	1.113552623	1.041903985	0.180904027	0.673795767	0.367900601	1.031447165	0.929038628	0.271974125	0.248820389	0.971713635	0.394795231	0.436165651	0.042737432	2.455084811	0.011441648	0.362378467	0.128525056	0.141738209	0.54399903	0.166398636	0.715219123	0.072073758	0.515156289	0.910446535	0.449894025	0.310316648	0.202597278	0.226165221	0.053719348	0.068654859	0.010239621	0.255896979	0.209558726	0.259519327	0.071842964	0.220346674	0.679243134	0.182447804	0.363785183	0.07107064	0.391054282	0.176990472	0.610221086	0.607310545	0.019297212	0.689184171	0.406664272
W06000010	2016	0.149344601	1.097381427	1.025761538	0.182757812	0.659604179	0.367278304	1.02212141	0.9132715	0.267799041	0.240300627	0.965870461	0.392304776	0.428035852	0.04145466	2.423762865	0.011742132	0.356089063	0.12952218	0.140955978	0.536708724	0.163912857	0.701289627	0.073804427	0.511851644	0.907348175	0.445384649	0.306736643	0.197545817	0.223744086	0.053636464	0.06838145	0.009846498	0.255634388	0.206363439	0.256775435	0.070193352	0.219596923	0.671936206	0.181622654	0.359874126	0.06980171	0.394194991	0.171971326	0.605534162	0.601149633	0.018143204	0.686432551	0.395790568
W06000011	2016	0.159824389	1.032533111	0.967067494	0.180683681	0.619489857	0.351006656	0.971955913	0.837082342	0.250095123	0.239901767	0.925451328	0.357775975	0.387116845	0.040111811	2.237547456	0.010966241	0.343596663	0.121800112	0.127143618	0.498882881	0.162332168	0.646490768	0.074369651	0.483638402	0.832387875	0.41814449	0.291787291	0.18153903	0.208305062	0.053539862	0.067249694	0.008578551	0.248055202	0.19630952	0.24187308	0.064959931	0.212664844	0.618965592	0.183659825	0.337683751	0.063854355	0.379640867	0.15888357	0.580528786	0.573628794	0.02415393	0.637110722	0.358249377
W06000012	2016	0.152197868	1.087856768	1.01398282	0.185827279	0.648506011	0.374385839	1.014886845	0.899063259	0.266261191	0.229412235	0.950694154	0.385120447	0.425946781	0.04041842	2.423821328	0.012060349	0.339111444	0.124869346	0.132708038	0.529556866	0.162320312	0.691134018	0.070597373	0.50289897	0.881917059	0.436057493	0.299377174	0.189602852	0.221578336	0.050437928	0.068998323	0.00947188	0.251360743	0.201057277	0.251664063	0.068499452	0.211672676	0.648197424	0.181839936	0.340717177	0.066422063	0.386408484	0.165434389	0.590717144	0.591177372	0.01811788	0.670357489	0.386909845
W06000013	2016	0.152427669	1.084411412	1.008748044	0.184934482	0.644258909	0.376666344	1.015880699	0.900615782	0.262819357	0.226975121	0.951443596	0.385669865	0.423485666	0.039905114	2.417445418	0.011872331	0.336611753	0.125387603	0.134553042	0.526838477	0.156489897	0.686708882	0.072393327	0.503453128	0.887688459	0.437963643	0.297568078	0.187851014	0.218501072	0.050957433	0.066615026	0.009319014	0.251424973	0.199381359	0.251876537	0.067676941	0.212577149	0.650744859	0.182342826	0.339924631	0.065911215	0.390944101	0.163863828	0.592945118	0.590470865	0.016993987	0.670120029	0.381282416
W06000014	2016	0.155303479	1.090872021	1.023176237	0.182912311	0.65312673	0.377276431	1.026521499	0.909991819	0.261347268	0.241642326	0.976543829	0.386818198	0.424247407	0.041914899	2.407395672	0.012305893	0.355630741	0.131507385	0.14281284	0.530582429	0.15899171	0.690591845	0.081989184	0.513138142	0.909523065	0.446417802	0.305949946	0.194833728	0.218224177	0.054374104	0.067159692	0.009401209	0.258702719	0.204159077	0.257676572	0.068796315	0.225432401	0.675087079	0.18830761	0.358651113	0.068942463	0.404570574	0.167951289	0.612526785	0.60417263	0.018271904	0.687433871	0.383780011
W06000015	2016	0.168844259	0.958451837	0.896172737	0.177749501	0.564679028	0.331541854	0.923488211	0.760180202	0.22103767	0.236750281	0.905252355	0.331282077	0.337710118	0.037701826	2.012814543	0.011398547	0.334857178	0.118235151	0.118012605	0.453778245	0.163129268	0.576907087	0.097609528	0.454832314	0.778720997	0.392754937	0.280896344	0.164065257	0.189237962	0.058630017	0.06622706	0.006968925	0.24062266	0.189136087	0.227489379	0.058805153	0.212370493	0.579449042	0.181210143	0.330231678	0.056856159	0.375813703	0.144055654	0.56522255	0.547165211	0.027960748	0.605076792	0.314189749
W06000016	2016	0.148895423	1.068364668	0.992562439	0.185570627	0.626681332	0.373219517	0.999158621	0.878603224	0.258856357	0.217086959	0.928609923	0.380327878	0.416782776	0.037849953	2.380889543	0.011821186	0.320026142	0.117276841	0.127817092	0.51051572	0.1594394	0.673059074	0.074103219	0.487647417	0.867119283	0.430507313	0.291356178	0.181455924	0.215317982	0.049062314	0.065837864	0.008843659	0.243558202	0.197045346	0.247125968	0.065229049	0.204007558	0.632547946	0.177592354	0.325699282	0.062788586	0.37732699	0.159210789	0.575502259	0.575018982	0.016167451	0.655467712	0.377010399
W06000018	2016	0.152789081	1.071937	0.999803499	0.186916294	0.629266897	0.373775608	1.008859916	0.882861258	0.2604144	0.223184232	0.942657725	0.382292938	0.415702693	0.0387421	2.374662365	0.011693938	0.328478122	0.121179807	0.12918953	0.513905752	0.161710543	0.672675546	0.079595591	0.492369009	0.875609867	0.434844497	0.293865602	0.183213858	0.214907281	0.050649087	0.067999958	0.008839773	0.246926537	0.198897448	0.249446493	0.065836693	0.207651687	0.640843596	0.18003382	0.334323562	0.063047134	0.382708911	0.160421573	0.584820927	0.581718999	0.017625499	0.664097492	0.377125896
W06000019	2016	0.146595186	1.08655386	1.00717702	0.187393811	0.637078311	0.373407047	1.00590243	0.88591141	0.263396348	0.21914045	0.920006421	0.380228419	0.424776078	0.038940149	2.423984423	0.011345395	0.325727938	0.118519898	0.124773955	0.51320585	0.168448621	0.681396618	0.070004692	0.488092505	0.862971384	0.429995894	0.290858684	0.185574919	0.220153487	0.046981831	0.068602426	0.009298153	0.246221819	0.198109954	0.244015244	0.065042892	0.198779527	0.626137663	0.179731717	0.324371915	0.063651196	0.367271453	0.158653328	0.564556708	0.571674152	0.016592864	0.646525042	0.384635994
W06000020	2016	0.156261184	1.067442025	0.99722772	0.184269047	0.632597015	0.366372851	1.009856285	0.877126066	0.260117901	0.229275442	0.9422615	0.378925571	0.412434628	0.039141751	2.358286339	0.011333265	0.334420802	0.123305237	0.132983027	0.517574915	0.155417293	0.677314891	0.078344638	0.497041401	0.874007404	0.431785806	0.29669552	0.185091928	0.215388544	0.052057586	0.066580936	0.008728646	0.249904605	0.200634631	0.25204006	0.066770758	0.214380955	0.648844122	0.183325524	0.33851635	0.06423056	0.388595394	0.162878409	0.594853312	0.584995922	0.019258462	0.666480381	0.376886291
W06000021	2016	0.153851266	1.127507011	1.064027191	0.182115297	0.689042974	0.380009096	1.050788542	0.958900812	0.273738954	0.257666385	1.017819832	0.405983935	0.441605353	0.04416012	2.475722491	0.012820902	0.385004816	0.145095044	0.159437171	0.560386989	0.159026313	0.724945861	0.075573917	0.53387641	0.963172825	0.464496459	0.321756228	0.211991219	0.227431901	0.058424589	0.068631113	0.010211725	0.271658667	0.2141029	0.270762606	0.0739335	0.241401621	0.729927153	0.192996227	0.398953073	0.074888452	0.429448258	0.182250698	0.653186338	0.634948621	0.019035395	0.727484185	0.404550822
W06000022	2016	0.156614272	1.020002727	0.952382516	0.182373473	0.604776474	0.353516261	0.969244723	0.830114332	0.246013417	0.221603661	0.903156606	0.356002194	0.378156119	0.038610648	2.226759952	0.01062225	0.321712003	0.116400196	0.12322929	0.491537608	0.162182823	0.634979666	0.086967419	0.476149493	0.823046252	0.414160463	0.281436267	0.173918446	0.203986463	0.051165782	0.066501031	0.008121279	0.241765023	0.192739042	0.236873233	0.063094549	0.203584581	0.605832423	0.17707584	0.324162339	0.060828772	0.367866267	0.151044857	0.562625251	0.55937086	0.020483969	0.620293589	0.350304995
W06000023	2016	0.153504893	1.128757695	1.057236677	0.181646309	0.682243806	0.369110266	1.043816088	0.956348772	0.276289464	0.262467542	0.998383656	0.404411314	0.437088475	0.044434376	2.468228032	0.01113699	0.378638138	0.135532363	0.149270832	0.554091975	0.165431883	0.73051104	0.07014721	0.528031892	0.938370154	0.458842574	0.320551209	0.211495535	0.230347799	0.057616672	0.070153213	0.010405793	0.261847162	0.215655108	0.26470865	0.073362934	0.230675238	0.704180328	0.187821762	0.385436635	0.073452426	0.40795247	0.182766876	0.633883039	0.624115945	0.020708278	0.714658888	0.413371858
W06000024	2016	0.150914735	1.060433399	0.984870866	0.18710939	0.61983584	0.370034748	0.994612771	0.877234284	0.258221054	0.219493574	0.92414836	0.378386483	0.408479189	0.038130344	2.351601027	0.011498266	0.319232199	0.118101034	0.126187037	0.502903463	0.163778184	0.663648067	0.073563732	0.485332728	0.85978754	0.42485329	0.287858425	0.179065627	0.214351699	0.048830726	0.067483945	0.008853084	0.242282936	0.196668781	0.243623398	0.064602948	0.199398568	0.618295938	0.175540321	0.324121437	0.062332302	0.372709076	0.157339913	0.568095068	0.572602884	0.016469815	0.647395148	0.373900444
[truncated: 31 more columns]
